# Supplementary material for: Identification of Zebrafish Calcium Toolkit Genes and Their Expression in the Brain
Source: MDPI journal article supplement (doi:10.3390/genes10030230), 2019-03-18
Supplement: s1 [file s1]

## Supplementary Materials

### Key-words used for identification of genes belonging to zebrafish CaTK:

calcium channels, receptors and proteins in ER, calcium ATPases in PM and ER, cytosolic calcium-binding proteins, calcium-dependent chaperones, calcium exchangers, transcription factors, mitochondria enzymes activated by calcium, calcium-sensing receptor, and calcium signaling regulatory proteins

**Table S1**

| Primer name | Primer sequence       | Slope   | Efficiency [%] |
|-------------|-----------------------|---------|----------------|
| eef1a1l1F   | AAAATCGGTGGTGCTGGCAA  | -3.2670 | 102            |
| eef1a1l1R   | GGAACGGTGTGATTGAGGGA  |         |                |
| stim1aF     | TGAATTCGGATTGCCAGTCGT | -3.2005 | 105            |
| stim1aR     | TTCAAGTCCCTCTGCGAACC  |         |                |
| stim1bF     | TGAGTTTTGAGGCCATCCGC  | -3.0570 | 112            |
| stim1bR     | AACCCATCCGTCTCTGTAC   |         |                |
| stim2aF     | ATTACGGAGGCGGATCGATT  | -3.0570 | 112            |
| stim2aR     | CCTCAATGCCTCCATCCTGA  |         |                |
| stim2bF     | CTGGTGGAGTGGACGATCTT  | -2.9835 | 116            |
| stim2bR     | CGTCAGAGGAGGTCGAATCA  |         |                |
| orai1aF     | GTGCATTTTTACCGCTCGCT  | -3.0041 | 115            |
| orai1aR     | TTGAAGAGGCATCTCCCTC   |         |                |
| orai1bF     | GCTGTAAGCAACGTGCACAA  | -3.0190 | 114            |
| orai1bR     | TCCCGATGACGGTGGAAAAG  |         |                |
| orai2F      | CGAGCTAGCCTGGGGTTTTT  | -3.0500 | 113            |
| orai2R      | AGTCAACCGGCAGGAACCTG  |         |                |

**Table S2 Zebrafish Calcium Toolkit**

| gene           | gene name                                                | gene ID   | chr | human orthologs | mouse orthologs |
|----------------|----------------------------------------------------------|-----------|-----|-----------------|-----------------|
| <i>aif1l</i>   | allograft inflammatory factor 1-like                     | 321033    | 5   | <i>AIF1L</i>    | <i>Aif1l</i>    |
| <i>akt1</i>    | v-akt murine thymoma viral oncogene homolog 1            | 101910198 | 17  | <i>AKT1</i>     | <i>Akt1</i>     |
| <i>akt2</i>    | v-akt murine thymoma viral oncogene homolog 2            | 378972    | 18  | <i>AKT2</i>     | <i>Akt2</i>     |
| <i>akt3b</i>   | v-akt murine thymoma viral oncogene homolog 3b           | 100149794 | 1   | <i>AKT3</i>     | <i>Akt3</i>     |
| <i>ano1</i>    | anoctamin 1, Ca <sup>2+</sup> activated chloride channel | 407698    | 7   | <i>ANO1</i>     | <i>Ano1</i>     |
| <i>anxa11a</i> | annexin A11a                                             | 368215    | 13  | <i>ANXA11</i>   | <i>Anxa11</i>   |
| <i>anxa11b</i> | annexin A11b                                             | 353365    | 12  | <i>ANXA11</i>   | <i>Anxa11</i>   |
| <i>anxa13</i>  | annexin A13                                              | 81880     | 24  | <i>ANXA13</i>   | <i>Anxa13-</i>  |
| <i>anxa13l</i> | annexin A13, like                                        | 554118    | 2   | <i>ANXA13</i>   | <i>Anxa13-</i>  |
| <i>anxa1a</i>  | annexin A1a                                              | 334724    | 5   | <i>ANXA1</i>    | <i>Anxa1</i>    |
| <i>anxa1b</i>  | annexin A1b                                              | 353358    | 5   | <i>ANXA1</i>    | <i>Anxa1</i>    |
| <i>anxa1c</i>  | annexin A1c                                              | 494158    | 5   | <i>ANXA1</i>    | <i>Anxa1</i>    |
| <i>anxa2a</i>  | annexin A2a                                              | 325557    | 25  | <i>ANXA2</i>    | <i>Anxa2</i>    |
| <i>anxa2b</i>  | annexin A2b                                              | 799806    | 7   | <i>ANXA2</i>    | <i>Anxa2</i>    |
| <i>anxa3a</i>  | annexin A3a                                              | 447893    | 6   | <i>ANXA3</i>    | <i>Anxa3</i>    |
| <i>anxa3b</i>  | annexin A3b                                              | 492336    | 10  | <i>ANXA3</i>    | <i>Anxa3</i>    |
| <i>anxa4</i>   | annexin A4                                               | 353362    | 10  | <i>ANXA4</i>    | <i>Anxa4</i>    |

|                  |                                                                                     |           |    |          |                 |
|------------------|-------------------------------------------------------------------------------------|-----------|----|----------|-----------------|
| <i>anxa5a</i>    | annexin A5a                                                                         | 557578    | 14 | ANXA5    | <i>Anxa5</i>    |
| <i>anxa5b</i>    | annexin A5b                                                                         | 337132    | 1  | ANXA5    | <i>Anxa5</i>    |
| <i>anxa6</i>     | annexin A6                                                                          | 353363    | 14 | ANXA6    | <i>Anxa6</i>    |
| <i>apba1a</i>    | amyloid beta (A4) precursor protein-binding, family A, member 1a                    | 100003938 | 5  | APBA1    | <i>Apba1</i>    |
| <i>apba1b</i>    | amyloid beta (A4) precursor protein-binding, family A, member 1b                    | 565507    | 10 | APBA1    | <i>Apba1</i>    |
| <i>apba2a</i>    | amyloid beta (A4) precursor protein-binding, family A, member 2a                    | 100330365 | 25 | APBA2    | <i>Apba2</i>    |
| <i>apba2b</i>    | amyloid beta (A4) precursor protein-binding, family A, member 2b                    | 327160    | 7  | APBA2    | <i>Apba2</i>    |
| <i>apbb1</i>     | amyloid beta (A4) precursor protein-binding, family B, member 1 (Fe65)              | 565164    | 10 | APBB1    | <i>Apbb1</i>    |
| <i>apbb1ip</i>   | amyloid beta (A4) precursor protein-binding, family B, member 1 interacting protein | 393607    | 24 | APBB1IP  | <i>Apbb1ip</i>  |
| <i>apbb2b</i>    | amyloid beta (A4) precursor protein-binding, family B, member 2b                    | 564990    | 1  | APBB2    | <i>Apbb2</i>    |
| <i>apbb3</i>     | amyloid beta (A4) precursor protein-binding, family B, member 3                     | 101883158 | 21 | APBB3    | <i>Apbb3</i>    |
| <i>atox1</i>     | antioxidant 1 copper chaperone                                                      | 558347    | 14 | ATOX1    | <i>Atox1</i>    |
| <i>atp2a1</i>    | ATPase sarcoplasmic/endoplasmic reticulum Ca <sup>2+</sup> transporting 1           | 260440    | 3  | ATP2A1   | <i>Atp2a1</i>   |
| <i>atp2a1l</i>   | ATPase sarcoplasmic/endoplasmic reticulum Ca <sup>2+</sup> transporting 1, like     | 494489    | 12 | ATP2A1   | <i>Atp2a1</i>   |
| <i>atp2a2a</i>   | ATPase sarcoplasmic/endoplasmic reticulum Ca <sup>2+</sup> transporting 2a          | 393940    | 8  | ATP2A2   | <i>Atp2a2</i>   |
| <i>atp2a2b</i>   | ATPase sarcoplasmic/endoplasmic reticulum Ca <sup>2+</sup> transporting 2b          | 568265    | 21 | ATP2A2   | <i>Atp2a2</i>   |
| <i>atp2a3</i>    | ATPase sarcoplasmic/endoplasmic reticulum Ca <sup>2+</sup> transporting 3           | 568671    | 5  | ATP2A3   | <i>Atp2a3</i>   |
| <i>atp2b1a</i>   | ATPase plasma membrane Ca <sup>2+</sup> transporting 1a                             | 378746    | 4  | ATP2B1   | <i>Atp2b1</i>   |
| <i>atp2b1b</i>   | ATPase plasma membrane Ca <sup>2+</sup> transporting 1b                             | 561190    | 25 | ATP2B4   | <i>Atp2b4</i>   |
| <i>atp2b2</i>    | ATPase plasma membrane Ca <sup>2+</sup> transporting 2                              | 557430    | 11 | ATP2B    | <i>Atp2b2</i>   |
| <i>atp2b3a</i>   | ATPase, Ca <sup>2+</sup> transporting, plasma membrane 3a                           | 436745    | 8  | ATP2B3   | <i>Atp2b3</i>   |
| <i>atp2b3b</i>   | ATPase plasma membrane Ca <sup>2+</sup> transporting 3b                             | 558525    | 23 | ATP2B3   | <i>Atp2b3</i>   |
| <i>atp2b4</i>    | ATPase plasma membrane Ca <sup>2+</sup> transporting 4                              | 768304    | 11 | ATP2B4   | <i>Atp2b4</i>   |
| <i>atp2c1</i>    | ATPase secretory pathway Ca <sup>2+</sup> transporting 1                            | 559574    | 16 | ATP2C1   | <i>Atp2c1</i>   |
| <i>atp6v0cb</i>  | ATPase H <sup>+</sup> transporting V0 subunit cb                                    | 325402    | 24 | ATP6VOC  | <i>Atp6v0c</i>  |
| <i>baxa</i>      | BCL2 associated X, apoptosis regulator a                                            | 58081     | 3  | BAX      | <i>Bax</i>      |
| <i>baxb</i>      | BCL2 associated X, apoptosis regulator b                                            | 503609    | 3  | BAX      | <i>Bax</i>      |
| <i>cab39</i>     | Ca <sup>2+</sup> binding protein 39                                                 | 415235    | 15 | CAB39    | <i>Cab39</i>    |
| <i>cab39l</i>    | Ca <sup>2+</sup> binding protein 39-like                                            | 492361    | 1  | CAB39L   | <i>Cab39l</i>   |
| <i>cabp1a</i>    | Ca <sup>2+</sup> binding protein 1a                                                 | 449789    | 8  | CABP1    | <i>Cabp1</i>    |
| <i>cabp1b</i>    | Ca <sup>2+</sup> binding protein 1b                                                 | 436687    | 10 | CABP1    | <i>Cabp1</i>    |
| <i>cacna1aa</i>  | voltage-dependent, P/Q type, alpha 1A subunit, a                                    | 562059    | 3  | CACNA1A  | <i>Cacna1a</i>  |
| <i>cacna1ab</i>  | voltage-dependent, P/Q type, alpha 1A subunit, b                                    | 569528    | 11 | CACNA1A  | <i>Cacna1a</i>  |
| <i>cacna1ba</i>  | voltage-dependent, N type, alpha 1B subunit, a                                      | 555941    | 5  | CACNA1B  | <i>Cacna1b</i>  |
| <i>cacna1bb</i>  | voltage-dependent, N type, alpha 1B subunit, a                                      | 562796    | 21 | CACNA1B  | <i>Cacna1b</i>  |
| <i>cacna1c</i>   | voltage-dependent, L type, alpha 1C subunit                                         | 170581    | 4  | CACNA1C  | <i>Cacna1c</i>  |
| <i>cacna1da</i>  | voltage-dependent, L type, alpha 1D subunit, a                                      | 403310    | 11 | CACNA1D  | <i>Cacna1d</i>  |
| <i>cacna1db</i>  | voltage-dependent, L type, alpha 1D subunit, b                                      | 403311    | 8  | CACNA1D  | <i>Cacna1d</i>  |
| <i>cacna1ea</i>  | voltage-dependent, R type, alpha 1E subunit a                                       | 564274    | 8  | CACNA1E  | <i>Cacna1e</i>  |
| <i>cacna1eb</i>  | voltage-dependent, R type, alpha 1E subunit b                                       | 567702    | 2  | CACNA1E  | <i>Cacna1e</i>  |
| <i>cacna1fa</i>  | voltage-dependent, L type, alpha 1F subunit a                                       | 793708    | 8  | CACNA1F  | <i>Cacna1f</i>  |
| <i>cacna1fb</i>  | voltage-dependent, L type, alpha 1F subunit                                         | 559964    | 8  | CACNA1F  | <i>Cacna1f</i>  |
| <i>cacna1g</i>   | voltage-dependent, T type, alpha 1G subunit                                         | 563904    | 12 | CACNA1G  | <i>Cacna1g</i>  |
| <i>cacna1ha</i>  | voltage-dependent, T type, alpha 1H subunit a                                       | 560875    | 3  | CACNA1H  | <i>Cacna1h</i>  |
| <i>cacna1hb</i>  | voltage-dependent, T type, alpha 1H subunit b                                       | 100007317 | 1  | CACNA1H  | <i>Cacna1h</i>  |
| <i>cacna1i</i>   | voltage-dependent, T type, alpha 1I subunit                                         | 566351    | 3  | CACNA1I  | <i>Cacna1i</i>  |
| <i>cacna1sa</i>  | voltage-dependent, L type, alpha 1S subunit, a                                      | 570683    | 22 | CACNA1S  | <i>Cacna1s</i>  |
| <i>cacna1sb</i>  | voltage-dependent, L type, alpha 1S subunit, b                                      | 405791    | 8  | CACNA1S  | <i>Cacna1s</i>  |
| <i>cacna2d1a</i> | voltage-dependent, alpha 2/delta subunit 1a                                         | 561434    | 4  | CACNA2D1 | <i>Cacna2d1</i> |
| <i>cacna2d2a</i> | voltage-dependent, alpha 2/delta subunit 2a                                         | 541376    | 6  | CACNA2D2 | <i>Cacna2d2</i> |
| <i>cacna2d2b</i> | voltage-dependent, alpha 2/delta subunit 2b                                         | 568759    | 22 | CACNA2D2 | <i>Cacna2d2</i> |
| <i>cacna2d3</i>  | voltage dependent, alpha2/delta subunit 3                                           | 100148645 | 11 | CACNA2D3 | <i>Cacna2d3</i> |

|                  |                                                                            |           |    |          |                 |
|------------------|----------------------------------------------------------------------------|-----------|----|----------|-----------------|
| <i>cacna2d3a</i> | voltage-dependent, alpha 2/delta subunit 3a                                | 100535196 | 8  | CACNA2D3 | <i>Cacna2d3</i> |
| <i>cacna2d4a</i> | voltage-dependent, alpha 2/delta subunit 4a                                | 568225    | 4  | CACNA2D4 | <i>Cacna2d4</i> |
| <i>cacna2d4b</i> | voltage-dependent, alpha 2/delta subunit 4b                                | 100150428 | 25 | CACNA2D4 | <i>Cacna2d4</i> |
| <i>cacnb1</i>    | voltage-dependent, beta 1 subunit                                          | 436925    | 3  | CACNB1   | <i>Cacnb1</i>   |
| <i>cacnb2a</i>   | voltage-dependent, beta 2a                                                 | 795492    | 7  | CACNB2   | <i>Cacnb2</i>   |
| <i>cacnb2b</i>   | voltage-dependent, beta 2b                                                 | 558806    | 2  | CACNB2   | <i>Cacnb2</i>   |
| <i>cacnb3a</i>   | voltage-dependent, beta 3a                                                 | 565158    | 23 | CACNB3   | <i>Cacnb3</i>   |
| <i>cacnb3b</i>   | voltage-dependent, beta 3b                                                 | 559015    | 23 | CACNB3   | <i>Cacnb3</i>   |
| <i>cacnb4a</i>   | voltage-dependent, beta 4a subunit                                         | 562422    | 9  | CACNB4   | <i>Cacnb4</i>   |
| <i>cacnb4b</i>   | voltage-dependent, beta 4b subunit                                         | 678560    | 6  | CACNB4   | <i>Cacnb4</i>   |
| <i>cacng1a</i>   | voltage-dependent, gamma subunit 1a                                        | 322013    | 6  | CACNG1   | <i>Cacng1</i>   |
| <i>cacng1b</i>   | voltage-dependent, gamma subunit 1b                                        | 571193    | 3  | CACNG1   | <i>Cacng1</i>   |
| <i>cacng2a</i>   | voltage-dependent, gamma subunit 2a                                        | 393614    | 3  | CACNG2   | <i>Cacng2</i>   |
| <i>cacng3a</i>   | voltage-dependent, gamma subunit 3a                                        | 567438    | 1  | CACNG3   | <i>Cacng3</i>   |
| <i>cacng3b</i>   | voltage-dependent, gamma subunit 3b                                        | 564883    | 3  | CACNG3   | <i>Cacng3</i>   |
| <i>cacng4a</i>   | voltage-dependent, gamma subunit 4a                                        | 797554    | 6  | CACNG4   | <i>Cacng4</i>   |
| <i>cacng4b</i>   | voltage-dependent, gamma subunit 4b                                        | 794222    | 3  | CACNG4   | <i>Cacng4</i>   |
| <i>cacng5a</i>   | voltage-dependent, gamma subunit 5a                                        | 797409    | 6  | CACNG5   | <i>Cacng5</i>   |
| <i>cacng5b</i>   | voltage-dependent, gamma subunit 5b                                        | 100331116 | 3  | CACNG5   | <i>Cacng5</i>   |
| <i>cacng6a</i>   | voltage-dependent, gamma subunit 6a                                        | 100034580 | 19 | CACNG6   | <i>Cacng6</i>   |
| <i>cacng6b</i>   | voltage-dependent, gamma subunit 6b                                        | 100003220 | 16 | CACNG6   | <i>Cacng6</i>   |
| <i>cacng7a</i>   | voltage-dependent, gamma subunit 7a                                        | 100034540 | 19 | CACNG7   | <i>Cacng7</i>   |
| <i>cacng7b</i>   | voltage-dependent, gamma subunit 7b                                        | 100003278 | 16 | CACNG7   | <i>Cacng7</i>   |
| <i>cacng8a</i>   | voltage-dependent, gamma subunit 8a                                        | 550428    | 19 | CACNG8   | <i>Cacng8</i>   |
| <i>cacng8b</i>   | voltage-dependent, gamma subunit 8b                                        | 100003329 | 16 | CACNG8   | <i>Cacng8</i>   |
| <i>cadps2</i>    | Ca <sup>2+</sup> -dependent secretion activator 2                          | 407617    | 25 | CADPS2   | <i>Cadps2</i>   |
| <i>cadpsa</i>    | Ca <sup>2+</sup> -dependent activator protein for secretion a              | 100333933 | 11 | CADPS    | <i>Cadps</i>    |
| <i>cadpsb</i>    | Ca <sup>2+</sup> -dependent activator protein for secretion b              | 100001129 | 6  | CADPS    | <i>Cadps</i>    |
| <i>calb1</i>     | calbindin 1                                                                | 100001650 | 16 | CALB1    | <i>Calb1</i>    |
| <i>calb2a</i>    | calbindin 2a                                                               | 393691    | 18 | CALB2    | <i>Calb2</i>    |
| <i>calb2b</i>    | calbindin 2b                                                               | 393684    | 7  | CALB2    | <i>Calb2</i>    |
| <i>calhm1</i>    | Ca <sup>2+</sup> homeostasis modulator 1                                   | 100005176 | 13 | CALHM1   | <i>Calhm1</i>   |
| <i>calhm2</i>    | Ca <sup>2+</sup> homeostasis modulator 2                                   | 368657    | 13 | CALHM2   | <i>Calhm2</i>   |
| <i>calhm3</i>    | Ca <sup>2+</sup> homeostasis modulator 3                                   | 100005130 | 13 | CALHM3   | <i>Calhm3</i>   |
| <i>calhm5.1</i>  | Ca <sup>2+</sup> homeostasis modulator family member 5, tandem duplicate 1 | 100037308 | 16 | CALHM5   | <i>Calhm5</i>   |
| <i>calhm5.2</i>  | Ca <sup>2+</sup> homeostasis modulator family member 5, tandem duplicate 2 | 798204    | 16 | CALHM5   | <i>Calhm5</i>   |
| <i>calhm6</i>    | Ca <sup>2+</sup> homeostasis modulator family member 6                     | 780840    | 16 | FAM26F   | <i>Fam26f</i>   |
| <i>calm1a</i>    | calmodulin 1a                                                              | 406660    | 17 | CALM1    | <i>Calm1</i>    |
| <i>calml4a</i>   | calmodulin-like 4a                                                         | 560151    | 7  | CALML4   | <i>Calml4</i>   |
| <i>calml4b</i>   | calmodulin-like 4b                                                         | 100321746 | 25 | CALML4   | <i>Calml4</i>   |
| <i>calr</i>      | calreticulin                                                               | 325317    | 8  | CALR     | <i>Calr</i>     |
| <i>calr3a</i>    | calreticulin 3a                                                            | 30248     | 22 | CALR3    | <i>Calr3</i>    |
| <i>calr3b</i>    | calreticulin 3b                                                            | 321315    | 2  | CALR3    | <i>Calr3</i>    |
| <i>calua</i>     | calumenin a                                                                | 415241    | 4  | CALU     | <i>Calu</i>     |
| <i>calub</i>     | calumenin b                                                                | 394057    | 18 | CALU     | <i>Calu</i>     |
| <i>canx</i>      | calnexin                                                                   | 406757    | 14 | CANX     | <i>Canx</i>     |
| <i>capn10</i>    | calpain 10                                                                 | 570311    | 2  | CAPN10   | <i>Capn10</i>   |
| <i>capn12</i>    | calpain 12                                                                 | 799247    | 18 | CAPN12   | <i>Capn12</i>   |
| <i>capn15</i>    | calpain 15                                                                 | 100330198 | 24 | CAPN15   | <i>Capn15</i>   |
| <i>capn1a</i>    | calpain 1, (mu/I) large subunit a                                          | 393417    | 13 | CAPN1    | <i>Capn1</i>    |
| <i>capn1b</i>    | calpain 1, (mu/I) large subunit b                                          | 565106    | 22 | CAPN1    | <i>Capn1</i>    |
| <i>capn2a</i>    | calpain 2, (m/II) large subunit a                                          | 541374    | 13 | CAPN2    | <i>Capn2</i>    |

|                 |                                                                 |           |    |         |                |
|-----------------|-----------------------------------------------------------------|-----------|----|---------|----------------|
| <i>capn2b</i>   | calpain 2, (m/II) large subunit b                               | 563053    | 22 | CAPN2   | <i>Capn2</i>   |
| <i>capn2l</i>   | calpain 2, (m/II) large subunit, like                           | 550505    | 22 | CAPN2   | <i>Capn2</i>   |
| <i>capn3a</i>   | calpain 3a, (p94)                                               | 447832    | 17 | CAPN3   | <i>Capn3</i>   |
| <i>capn3b</i>   | calpain 3b                                                      | 100034405 | 20 | CAPN3   | <i>Capn3</i>   |
| <i>capn5a</i>   | calpain 5a                                                      | 563346    | 18 | CAPN5   | <i>Capn5</i>   |
| <i>capn5b</i>   | calpain 5b                                                      | 100006332 | 21 | CAPN5   | <i>Capn5</i>   |
| <i>capn7</i>    | calpain 7                                                       | 556792    | 22 | CAPN7   | <i>Capn7</i>   |
| <i>capn9</i>    | calpain 9                                                       | 445107    | 20 | CAPN9   | <i>Capn9</i>   |
| <i>casr</i>     | Ca <sup>2+</sup> sensing receptor                               | 560607    | 5  | CASR    | <i>Casr</i>    |
| <i>cbarpb</i>   | voltage-dependent, beta subunit associated regulatory protein b | 557421    | 22 | CBARP   | <i>Cbarp</i>   |
| <i>ccar1</i>    | cell division cycle and apoptosis regulator 1                   | 568087    | 13 | CCAR1   | <i>Ccar1</i>   |
| <i>ccar2</i>    | cell cycle and apoptosis regulator 2                            | 564155    | 10 | CCAR2   | <i>Ccar2</i>   |
| <i>ccbe1</i>    | collagen and Ca <sup>2+</sup> binding EGF domains 1             | 555629    | 21 | CCBE1   | <i>Ccbe1</i>   |
| <i>cetn2</i>    | centrin, EF-hand protein, 2                                     | 100006257 | 14 | CETN2   | <i>Cetn2</i>   |
| <i>cetn3</i>    | centrin 3                                                       | 552931    | 10 | CETN3   | <i>Cetn3</i>   |
| <i>cetn4</i>    | centrin 4                                                       | 795310    | 14 | CETN4P  | <i>Cetn4</i>   |
| <i>cgref1</i>   | cell growth regulator with EF-hand domain 1                     | 559576    | 17 | CGREF1  | <i>Cgref1</i>  |
| <i>cherp</i>    | Ca <sup>2+</sup> homeostasis endoplasmic reticulum protein      | 337851    | 22 | CHERP   | <i>Cherp</i>   |
| <i>chp1</i>     | calcineurin-like EF-hand protein 1                              | 325361    | 13 | CHP1    | <i>Chp1</i>    |
| <i>chp2</i>     | calcineurin-like EF-hand protein 2                              | 327599    | 15 | CHP2    | <i>Chp2</i>    |
| <i>cisd2</i>    | CDGSH iron sulfur domain 2                                      | 393354    | 1  | CISD2   | <i>Cisd2</i>   |
| <i>clgn</i>     | calmegin                                                        | 556495    | 1  | CLGN    | <i>Clgn</i>    |
| <i>clstn1</i>   | calsyntenin 1                                                   | 777737    | 23 | CLSTN1  | <i>Clstn1</i>  |
| <i>clstn2</i>   | calsyntenin 2                                                   | 100125749 | 2  | CLSTN2  | <i>Clstn2</i>  |
| <i>clstn3</i>   | calsyntenin 3                                                   | 555627    | 16 | CLSTN3  | <i>Clstn3</i>  |
| <i>cracr2aa</i> | Ca <sup>2+</sup> release activated channel regulator 2Aa        | 100330395 | 18 | CRACR2A | <i>Cracr2a</i> |
| <i>cracr2ab</i> | Ca <sup>2+</sup> release activated channel regulator 2Ab        | 564347    | 4  | CRACR2A | <i>Cracr2a</i> |
| <i>cracr2b</i>  | Ca <sup>2+</sup> release activated channel regulator 2B         | 790936    | 25 | CRACR2B | <i>Cracr2b</i> |
| <i>creb1a</i>   | cAMP responsive element binding protein 1a                      | 573207    | 1  | CREB1   | <i>Creb1</i>   |
| <i>creb1b</i>   | cAMP responsive element binding protein 1b                      | 550516    | 9  | CREB1   | <i>Creb1</i>   |
| <i>creb5a</i>   | cAMP responsive element binding protein 5a                      | 101886947 | 19 | CREB5   | <i>Creb5</i>   |
| <i>creb5b</i>   | cAMP responsive element binding protein 5b                      | 565910    | 16 | CREB5   | <i>Creb5</i>   |
| <i>crebl2</i>   | cAMP responsive element binding protein-like 2                  | 436975    | 4  | CREBL2  | <i>Crebl2</i>  |
| <i>creb3l1</i>  | cAMP responsive element binding protein 3-like 1                | 338317    | 7  | CREB3L1 | <i>Creb3l1</i> |
| <i>creb3l2</i>  | cAMP responsive element binding protein 3-like 2                | 791169    | 4  | CREB3L2 | <i>Creb3l2</i> |
| <i>creb3l3a</i> | cAMP responsive element binding protein 3-like 3a               | 553700    | 22 | CREB3L3 | <i>Creb3l3</i> |
| <i>creb3l3b</i> | cAMP responsive element binding protein 3-like 3b               | 100538072 | 2  | CREB3L3 | <i>Creb3l3</i> |
| <i>creb3l4</i>  | cAMP responsive element binding protein 3-like 4                | 100333318 | 16 | CREB3L4 | <i>Creb3l4</i> |
| <i>crebbpa</i>  | CREB binding protein a                                          | 566841    | 22 | CREBBP  | <i>Crebbp</i>  |
| <i>crebbpb</i>  | CREB binding protein b                                          | 567111    | 3  | CREBBP  | <i>Crebbp</i>  |
| <i>crebrf</i>   | creb3 regulatory factor                                         | 100149876 | 21 | CREBRF  | <i>Crebrf</i>  |
| <i>crebzf</i>   | CREB/ATF bZIP transcription factor                              | 562093    | 10 | CREBZF  | <i>Crebzf</i>  |
| <i>creld2</i>   | cysteine-rich with EGF-like domains 2                           | 393495    | 4  | CRELD2  | <i>Creld2</i>  |
| <i>crtc1a</i>   | CREB regulated transcription coactivator 1a                     | 768293    | 2  | CRTC1   | <i>Crtc1</i>   |
| <i>crtc1b</i>   | CREB regulated transcription coactivator 1b                     | 571344    | 11 | CRTC1   | <i>Crtc1</i>   |
| <i>crtc2</i>    | CREB regulated transcription coactivator 2                      | 799532    | 19 | CRTC2   | <i>Crtc2</i>   |
| <i>crtc3</i>    | CREB regulated transcription coactivator 3                      | 570024    | 7  | CRTC3   | <i>Crtc3</i>   |
| <i>efcab1</i>   | EF-hand Ca <sup>2+</sup> binding domain 1                       | 558421    | 19 | EFCAB1  | <i>Efcab1</i>  |
| <i>efcab11</i>  | EF-hand Ca <sup>2+</sup> binding domain 11                      | 550510    | 17 | EFCAB11 | <i>Efcab11</i> |
| <i>efcab2</i>   | EF-hand Ca <sup>2+</sup> binding domain 2                       | 558031    | 17 | EFCAB2  | <i>Efcab2</i>  |
| <i>efcab6</i>   | EF-hand Ca <sup>2+</sup> binding domain 6                       | 492579    | 25 | EFCAB6  | <i>Efcab6</i>  |
| <i>efcab7</i>   | EF-hand Ca <sup>2+</sup> binding domain 7                       | 415210    | 6  | EFCAB7  | <i>Efcab7</i>  |

|                 |                                                               |           |    |                |                |
|-----------------|---------------------------------------------------------------|-----------|----|----------------|----------------|
| <i>efcc1</i>    | EF-hand and coiled-coil domain containing 1                   | 100333996 | 11 | <i>EFCC1</i>   | <i>Efcc1</i>   |
| <i>efemp1</i>   | EGF containing fibulin extracellular matrix protein 1         | 100332567 | 13 | <i>EFEMP1</i>  | <i>Efemp1</i>  |
| <i>efemp2a</i>  | EGF containing fibulin extracellular matrix protein 2a        | 494044    | 14 | <i>EFEMP2</i>  | <i>Efemp2</i>  |
| <i>efemp2b</i>  | EGF containing fibulin extracellular matrix protein 2b        | 572703    | 21 | <i>EFEMP2</i>  | <i>Efemp2</i>  |
| <i>efhb</i>     | EF-hand domain family, member B                               | 571184    | 16 | <i>EFHB</i>    | <i>Efhb</i>    |
| <i>efhc1</i>    | EF-hand domain (C-terminal) containing 1                      | 393942    | 20 | <i>EFHC1</i>   | <i>Efhc1</i>   |
| <i>efhc2</i>    | EF-hand domain (C-terminal) containing 2                      | 567323    | 9  | <i>EFHC2</i>   | <i>Efhc2</i>   |
| <i>efhd1</i>    | EF-hand domain family, member D1                              | 335521    | 15 | <i>EFHD1</i>   | <i>Efhd1</i>   |
| <i>efhd2</i>    | EF-hand domain family, member D2                              | 571114    | 8  | <i>EFHD2</i>   | <i>Efhd2</i>   |
| <i>egfl7</i>    | EGF-like-domain, multiple 7                                   | 678640    | 21 | <i>EGFL7</i>   | <i>Egfl7</i>   |
| <i>ehd1a</i>    | EH-domain containing 1a                                       | 405810    | 14 | <i>EHD1</i>    | <i>Ehd1</i>    |
| <i>ehd1b</i>    | EH-domain containing 1b                                       | 447839    | 10 | <i>EHD1</i>    | <i>Ehd1</i>    |
| <i>ehd2a</i>    | EH-domain containing 2a                                       | 567055    | 5  | <i>EHD2</i>    | <i>Ehd2</i>    |
| <i>ehd2b</i>    | EH-domain containing 2b                                       | 337401    | 18 | <i>EHD2</i>    | <i>Ehd2</i>    |
| <i>ehd3</i>     | EH-domain containing 3                                        | 562949    | 20 | <i>EHD3</i>    | <i>Ehd3</i>    |
| <i>ehd4</i>     | EH-domain containing 4                                        | 569546    | 17 | <i>EHD4</i>    | <i>Ehd4</i>    |
| <i>eps15</i>    | epidermal growth factor receptor pathway substrate 15         | 795505    | 8  | <i>EPS15</i>   | <i>Eps15</i>   |
| <i>eps15l1a</i> | epidermal growth factor receptor pathway substrate 15-like 1a | 568170    | 22 | <i>EPS15L1</i> | <i>Eps15l1</i> |
| <i>eps15l1b</i> | epidermal growth factor receptor pathway substrate 15-like 1b | 100329948 | 2  | <i>EPS15L1</i> | <i>Eps15l1</i> |
| <i>faim2a</i>   | Fas apoptotic inhibitory molecule 2a                          | 541391    | 2  | <i>FAIM2</i>   | <i>Faim2</i>   |
| <i>faim2b</i>   | Fas apoptotic inhibitory molecule 2b                          | 100006044 | 11 | <i>FAIM2</i>   | <i>Faim2</i>   |
| <i>fbln1</i>    | fibulin 1                                                     | 30240     | 25 | <i>FBLN1</i>   | <i>Fbln1</i>   |
| <i>fbln2</i>    | fibulin 2                                                     | 553503    | 11 | <i>FBLN2</i>   | <i>Fbln2</i>   |
| <i>fbln5</i>    | fibulin 5                                                     | 449806    | 13 | <i>FBLN5</i>   | <i>Fbln5</i>   |
| <i>fbln7</i>    | fibulin 7                                                     | 100000083 | 13 | <i>FBLN7</i>   | <i>Fbln7</i>   |
| <i>fbn2a</i>    | fibrillin 2a                                                  | 558217    | 10 | <i>FBN2</i>    | <i>Fbn2</i>    |
| <i>fkbp1aa</i>  | FKBP prolyl isomerase 1Aa                                     | 335335    | 8  | <i>FKBP1A</i>  | <i>Fkbp1a</i>  |
| <i>fkbp1ab</i>  | FKBP prolyl isomerase 1Ab                                     | 449552    | 23 | <i>FKBP1A</i>  | <i>Fkbp1a</i>  |
| <i>fkbp1b</i>   | FKBP prolyl isomerase 1B                                      | 393785    | 20 | <i>FKBP1B</i>  | <i>Fkbp1b</i>  |
| <i>fkbp2</i>    | FKBP prolyl isomerase 2                                       | 447939    | 21 | <i>FKBP2</i>   | <i>Fkbp2</i>   |
| <i>fkbp3</i>    | FKBP prolyl isomerase 3                                       | 368863    | 20 | <i>FKBP3</i>   | <i>Fkbp3</i>   |
| <i>fkbp4</i>    | FKBP prolyl isomerase 4                                       | 321795    | 18 | <i>FKBP4</i>   | <i>Fkbp4</i>   |
| <i>fkbp5</i>    | FKBP prolyl isomerase 5                                       | 368924    | 6  | <i>FKBP5</i>   | <i>Fkbp5</i>   |
| <i>fkbp6</i>    | FKBP prolyl isomerase 6                                       | 402839    | 5  | <i>FKBP6</i>   | <i>Fkbp6</i>   |
| <i>fkbp7</i>    | FKBP prolyl isomerase 7                                       | 368498    | 9  | <i>FKBP7</i>   | <i>Fkbp7</i>   |
| <i>fkbp8</i>    | FKBP prolyl isomerase 8                                       | 393858    | 22 | <i>FKBP8</i>   | <i>Fkbp8</i>   |
| <i>fkbp9</i>    | FKBP prolyl isomerase 9                                       | 445126    | 19 | <i>FKBP9</i>   | <i>Fkbp9</i>   |
| <i>fkbp10a</i>  | FKBP prolyl isomerase 10a                                     | 799903    | 19 | <i>FKBP10</i>  | <i>Fkbp10</i>  |
| <i>fkbp10b</i>  | FKBP prolyl isomerase 10b                                     | 324381    | 12 | <i>FKBP10</i>  | <i>Fkbp10</i>  |
| <i>fkbp11</i>   | FKBP prolyl isomerase 11                                      | 368823    | 6  | <i>FKBP11</i>  | <i>Fkbp11</i>  |
| <i>fkbp14</i>   | FKBP prolyl isomerase 14                                      | 445077    | 16 | <i>FKBP14</i>  | <i>Fkbp14</i>  |
| <i>fkbp1</i>    | FKBP prolyl isomerase like                                    | 100149636 | 23 | <i>FKBPL</i>   | <i>Fkbp1</i>   |
| <i>ghitm</i>    | growth hormone inducible transmembrane protein                | 393563    | 12 | <i>GHITM</i>   | <i>Ghitm</i>   |
| <i>gpat3</i>    | glycerol-3-phosphate acyltransferase 3                        | 436958    | 21 | <i>GPAT3</i>   | <i>Gpat3</i>   |
| <i>gpat4</i>    | glycerol-3-phosphate acyltransferase 4                        | 678522    | 10 | <i>GPAT4</i>   | <i>Gpat4</i>   |
| <i>gria1a</i>   | glutamate receptor, ionotropic, AMPA 1a                       | 798689    | 14 | <i>GRIA1</i>   | <i>Gria1</i>   |
| <i>gria1b</i>   | glutamate receptor, ionotropic, AMPA 1b                       | 403044    | 21 | <i>GRIA1</i>   | <i>Gria1</i>   |
| <i>gria2a</i>   | glutamate receptor, ionotropic, AMPA 2a                       | 170450    | 1  | <i>GRIA2</i>   | <i>Gria2</i>   |
| <i>gria2b</i>   | glutamate receptor, ionotropic, AMPA 2b                       | 170451    | 14 | <i>GRIA2</i>   | <i>Gria2</i>   |
| <i>gria3a</i>   | glutamate receptor, ionotropic, AMPA 3a                       | 170452    | 5  | <i>GRIA3</i>   | <i>Gria3</i>   |
| <i>gria3b</i>   | glutamate receptor, ionotropic, AMPA 3b                       | 368416    | 14 | <i>GRIA3</i>   | <i>Gria3</i>   |
| <i>gria4a</i>   | glutamate receptor, ionotropic, AMPA 4a                       | 407735    | 15 | <i>GRIA4</i>   | <i>Gria4</i>   |

|                |                                                                                                      |           |    |               |               |
|----------------|------------------------------------------------------------------------------------------------------|-----------|----|---------------|---------------|
| <i>gria4b</i>  | glutamate receptor, ionotropic, AMPA 4b                                                              | 336069    | 21 | <i>GRIA4</i>  | <i>Gria4</i>  |
| <i>grin1a</i>  | glutamate receptor, ionotropic, N-methyl D-aspartate 1a                                              | 767745    | 21 | <i>GRIN1</i>  | <i>Grin1</i>  |
| <i>grin1b</i>  | glutamate receptor, ionotropic, N-methyl D-aspartate 1b                                              | 100005675 | 5  | <i>GRIN1</i>  | <i>Grin1</i>  |
| <i>grin2aa</i> | glutamate receptor, ionotropic, N-methyl D-aspartate 2A, a                                           | 563297    | 3  | <i>GRIN2A</i> | <i>Grin2a</i> |
| <i>grin2ab</i> | glutamate receptor, ionotropic, N-methyl D-aspartate 2A, b                                           | 570493    | 1  | <i>GRIN2A</i> | <i>Grin2a</i> |
| <i>grin2bb</i> | glutamate receptor, ionotropic, N-methyl D-aspartate 2B, genome duplicate b                          | 559976    | 1  | <i>GRIN2B</i> | <i>Grin2b</i> |
| <i>grin2cb</i> | glutamate receptor, ionotropic, N-methyl D-aspartate 2Cb                                             | 100333648 | 12 | <i>GRIN2C</i> | <i>Grin2c</i> |
| <i>grin2da</i> | glutamate receptor, ionotropic, N-methyl D-aspartate 2D, a                                           | 449864    | 19 | <i>GRIN2D</i> | <i>Grin2d</i> |
| <i>grin3a</i>  | glutamate receptor, ionotropic, N-methyl-D-aspartate 3A                                              | 564832    | 10 | <i>GRIN3A</i> | <i>Grin3a</i> |
| <i>grin3ba</i> | glutamate receptor, ionotropic, N-methyl-D-aspartate 3Ba                                             | 566411    | 2  | <i>GRIN3B</i> | <i>Grin3b</i> |
| <i>grin3bb</i> | glutamate receptor, ionotropic, N-methyl-D-aspartate 3Bb                                             | 100333101 | 11 | <i>GRIN3B</i> | <i>Grin3b</i> |
| <i>grinaa</i>  | glutamate receptor, ionotropic, N-methyl D-aspartate-associated protein 1a                           | 724005    | 19 | <i>GRINA</i>  | <i>Grina</i>  |
| <i>grinab</i>  | glutamate receptor, ionotropic, N-methyl D-aspartate-associated protein 1b                           | 394183    | 16 | <i>GRINA</i>  | <i>Grina</i>  |
| <i>hgfb</i>    | hepatocyte growth factor b                                                                           | 100333596 | 18 | <i>HGF</i>    | <i>Hgf</i>    |
| <i>hp</i>      | haptoglobin                                                                                          | 566096    | 7  | <i>HP</i>     | <i>Hp</i>     |
| <i>hpca</i>    | hippocalcin                                                                                          | 393696    | 19 | <i>HPCA</i>   | <i>Hpca</i>   |
| <i>hpcal1</i>  | hippocalcin-like 1                                                                                   | 394139    | 20 | <i>HPCAL1</i> | <i>Hpcal1</i> |
| <i>hpcal4</i>  | hippocalcin-like 4                                                                                   | 564909    | 19 | <i>HPCAL4</i> | <i>Hpcal4</i> |
| <i>hrc</i>     | histidine rich Ca <sup>2+</sup> binding protein                                                      | 553296    | 12 | <i>HRC</i>    | <i>Hrc</i>    |
| <i>itpr1a</i>  | inositol 1,4,5-trisphosphate receptor, type 1a                                                       | 567611    | 6  | <i>ITPR1</i>  | <i>Itpr1</i>  |
| <i>itpr1b</i>  | inositol 1,4,5-trisphosphate receptor, type 1b                                                       | 100149388 | 11 | <i>ITPR1</i>  | <i>Itpr1</i>  |
| <i>itpr2</i>   | inositol 1,4,5-trisphosphate receptor, type 2                                                        | 562585    | 18 | <i>ITPR2</i>  | <i>Itpr2</i>  |
| <i>itpr3</i>   | inositol 1,4,5-trisphosphate receptor, type 3                                                        | 794666    | 8  | <i>ITPR3</i>  | <i>Itpr3</i>  |
| <i>itsn1</i>   | intersectin 1 (SH3 domain protein)                                                                   | 368504    | 1  | <i>ITSN1</i>  | <i>Itsn1</i>  |
| <i>itsn2a</i>  | intersectin 2a                                                                                       | 566412    | 20 | <i>ITSN2</i>  | <i>Itsn2</i>  |
| <i>itsn2b</i>  | intersectin 2b                                                                                       | 445153    | 17 | <i>ITSN2</i>  | <i>Itsn2</i>  |
| <i>kcnip1a</i> | Kv channel interacting protein 1 a                                                                   | 100008068 | -  | <i>KCNIP1</i> | <i>Kcnip1</i> |
| <i>kcnip1b</i> | Kv channel interacting protein 1 b                                                                   | 494089    | 10 | <i>KCNIP1</i> | <i>Kcnip1</i> |
| <i>kcnip2</i>  | Kv channel interacting protein 2                                                                     | 100003947 | 22 | <i>KCNIP2</i> | <i>Kcnip2</i> |
| <i>kcnip3a</i> | Kv channel interacting protein 3a, calsenilin                                                        | 393792    | 8  | <i>KCNIP3</i> | <i>Kcnip3</i> |
| <i>kcnip3b</i> | Kv channel interacting protein 3b, calsenilin                                                        | 393755    | 10 | <i>KCNIP3</i> | <i>Kcnip3</i> |
| <i>kcnma1a</i> | potassium large conductance Ca <sup>2+</sup> -activated channel, subfamily M, alpha member 1a        | 568554    | 13 | <i>KCNMA1</i> | <i>Kcnma1</i> |
| <i>kcnma1b</i> | potassium large conductance Ca <sup>2+</sup> -activated channel, subfamily M, alpha member 1b        | 798583    | 12 | <i>KCNMA1</i> | <i>Kcnma1</i> |
| <i>kcnmb2</i>  | potassium large conductance Ca <sup>2+</sup> -activated channel, subfamily M, beta member 2          | 541398    | 2  | <i>KCNMB2</i> | <i>Kcnmb2</i> |
| <i>kcnn1a</i>  | potassium intermediate/small conductance Ca <sup>2+</sup> -activated channel, subfamily N, member 1a | 563352    | 2  | <i>KCNN1</i>  | <i>Kcnn1</i>  |
| <i>kcnn1b</i>  | potassium intermediate/small conductance Ca <sup>2+</sup> -activated channel, subfamily N, member 1b | 570401    | 8  | <i>KCNN1</i>  | <i>Kcnn1</i>  |
| <i>kcnn3</i>   | potassium intermediate/small conductance Ca <sup>2+</sup> -activated channel, subfamily N, member 3  | 570138    | 16 | <i>KCNN3</i>  | <i>Kcnn3</i>  |
| <i>kcnn4</i>   | potassium intermediate/small conductance Ca <sup>2+</sup> -activated channel, subfamily N, member 4  | 568363    | 16 | <i>KCNN4</i>  | <i>Kcnn4</i>  |
| <i>kcnt1</i>   | potassium channel, subfamily T, member 1                                                             | 100004419 | 21 | <i>KCNT1</i>  | <i>Kcnt1</i>  |
| <i>kcnt2</i>   | potassium channel, subfamily T, member 2                                                             | 568327    | 2  | <i>KCNT2</i>  | <i>Kcnt2</i>  |
| <i>lats1</i>   | large tumor suppressor kinase 1                                                                      | 553164    | 20 | <i>LATS1</i>  | <i>Lats1</i>  |
| <i>lats2</i>   | large tumor suppressor kinase 2                                                                      | 567674    | 9  | <i>LATS2</i>  | <i>Lats2</i>  |
| <i>letm1</i>   | leucine zipper-EF-hand containing transmembrane protein 1                                            | 570745    | 13 | <i>LETM1</i>  | <i>Letm1</i>  |
| <i>letm2</i>   | leucine zipper-EF-hand containing transmembrane protein 2                                            | 100006201 | 10 | <i>LETM2</i>  | <i>Letm2</i>  |
| <i>letmd1</i>  | LETM1 domain containing 1                                                                            | 567014    | 23 | <i>LETMD1</i> | <i>Letmd1</i> |

|                                       |                                                                       |           |    |               |               |
|---------------------------------------|-----------------------------------------------------------------------|-----------|----|---------------|---------------|
| <i>lpcat1</i>                         | lysophosphatidylcholine acyltransferase 1                             | 555969    | 19 | <i>LPCAT1</i> | <i>Lpcat1</i> |
| <i>lpcat2</i>                         | lysophosphatidylcholine acyltransferase 2                             | 553683    | 7  | <i>LPCAT2</i> | <i>Lpcat2</i> |
| <i>lpcat3</i>                         | lysophosphatidylcholine acyltransferase 2                             | 555566    | 16 | <i>LPCAT3</i> | <i>Lpcat3</i> |
| <i>lpcat4</i>                         | lysophosphatidylcholine acyltransferase 4                             | 327566    | 7  | <i>LPCAT4</i> | <i>Lpcat4</i> |
| <i>ltbp1</i>                          | latent transforming growth factor beta binding protein 1              | 562072    | 17 | <i>LTBP1</i>  | <i>Ltbp1</i>  |
| <i>ltbp3</i>                          | latent transforming growth factor beta binding protein 3              | 562912    | 5  | <i>LTBP3</i>  | <i>Ltbp3</i>  |
| <i>ltbp4</i>                          | latent transforming growth factor beta binding protein 4              | 100333499 | 18 | <i>LTBP4</i>  | <i>Ltbp4</i>  |
| <i>mast1a</i>                         | microtubule associated serine/threonine kinase 1a                     | 796739    | 1  | <i>MAST1</i>  | <i>Mast1</i>  |
| <i>mast1b</i>                         | microtubule associated serine/threonine kinase 1b                     | 796144    | 3  | <i>MAST1</i>  | <i>Mast1</i>  |
| <i>mast2</i>                          | microtubule associated serine/threonine kinase 2                      | 100001267 | 6  | <i>MAST2</i>  | <i>Mast2</i>  |
| <i>mast3a</i>                         | microtubule associated serine/threonine kinase 3a                     | 100534685 | 2  | <i>MAST3</i>  | <i>Mast3</i>  |
| <i>mast3b</i>                         | microtubule associated serine/threonine kinase 3b                     | 100535762 | 11 | <i>MAST3</i>  | <i>Mast3</i>  |
| <i>mast4</i>                          | microtubule associated serine/threonine kinase family member 4        | 100149322 | 5  | <i>MAST4</i>  | <i>Mast4</i>  |
| <i>mastl</i>                          | microtubule associated serine/threonine kinase-like                   | 445215    | 24 | <i>MASTL</i>  | <i>Mastl</i>  |
| <i>mcu</i>                            | mitochondrial Ca <sup>2+</sup> uniporter                              | 768182    | 13 | <i>MCU</i>    | <i>Mcu</i>    |
| <i>mcur1</i><br>( <i>zgc:165532</i> ) | mitochondrial Ca <sup>2+</sup> uniporter regulator 1                  | 550408    | 7  | <i>MCUR1</i>  | <i>Mcur1</i>  |
| <i>micu1</i>                          | mitochondrial Ca <sup>2+</sup> uptake 1                               | 561210    | 13 | <i>MICU1</i>  | <i>Micu1</i>  |
| <i>micu2</i>                          | mitochondrial Ca <sup>2+</sup> uptake 2                               | 548335    | 5  | <i>MICU1</i>  | <i>Micu1</i>  |
| <i>micu3a</i>                         | mitochondrial Ca <sup>2+</sup> uptake family, member 3a               | 559552    | 1  | <i>MICU3</i>  | <i>Micu3</i>  |
| <i>micu3b</i>                         | mitochondrial Ca <sup>2+</sup> uptake family, member 3a               | 100536173 | 14 | <i>MICU3</i>  | <i>Micu3</i>  |
| <i>myl10</i>                          | myosin, light chain 10, regulatory                                    | 550569    | 10 | <i>MYL10</i>  | <i>Myl10</i>  |
| <i>myl2a</i>                          | myosin, light chain 2a, regulatory, cardiac, slow                     | 100537244 | 5  | <i>MYL2</i>   | <i>Myl2</i>   |
| <i>myl2b</i>                          | myosin, light chain 2b, regulatory, cardiac, slow                     | 677750    | 8  | <i>MYL2</i>   | <i>Myl2</i>   |
| <i>myl6</i>                           | myosin, light chain 6, alkali, smooth muscle and non-muscle           | 798632    | 6  | <i>MYL6</i>   | <i>Myl6</i>   |
| <i>myl7</i>                           | myosin, light chain 7, regulatory                                     | 30592     | 8  | <i>MYL7</i>   | <i>Myl7</i>   |
| <i>myl9a</i>                          | myosin, light chain 9a, regulatory                                    | 450006    | 23 | <i>MYL9</i>   | <i>Myl9</i>   |
| <i>myl9b</i>                          | myosin, light chain 9b, regulatory                                    | 406493    | 6  | <i>MYL9</i>   | <i>Myl9</i>   |
| <i>mylpfa</i>                         | myosin light chain, phosphorylatable, fast skeletal muscle a          | 30429     | 3  | <i>MYLPF</i>  | <i>Mylpf</i>  |
| <i>mylpfb</i>                         | myosin light chain, phosphorylatable, fast skeletal muscle b          | 447930    | 12 | <i>MYLPF</i>  | <i>Mylpf</i>  |
| <i>ncs1a</i>                          | neuronal Ca <sup>2+</sup> sensor 1a                                   | 393437    | 5  | <i>NCS1</i>   | <i>Ncs1</i>   |
| <i>ncs1b</i>                          | neuronal Ca <sup>2+</sup> sensor 1b                                   | 553174    | 8  | <i>NCS1</i>   | <i>Ncs1</i>   |
| <i>necab1</i>                         | N-terminal EF-hand Ca <sup>2+</sup> binding protein 1                 | 550546    | 19 | <i>NECAB1</i> | <i>Necab1</i> |
| <i>necab2</i>                         | N-terminal EF-hand Ca <sup>2+</sup> binding protein 2                 | 565258    | 18 | <i>NECAB2</i> | <i>Necab2</i> |
| <i>necab3</i>                         | N-terminal EF-hand Ca <sup>2+</sup> binding protein 3                 | 101887165 | 6  | <i>NECAB3</i> | <i>Necab3</i> |
| <i>nell2a</i>                         | neural EGFL like 2a                                                   | 790930    | 25 | <i>NELL2</i>  | <i>Nell2</i>  |
| <i>nell2b</i>                         | neural EGFL like 2b                                                   | 336082    | 4  | <i>NELL2</i>  | <i>Nell2</i>  |
| <i>nid2a</i>                          | nidogen 2a (osteonidogen)                                             | 322921    | 17 | <i>NID2</i>   | <i>Nid2</i>   |
| <i>nid2b</i>                          | nidogen 2b (osteonidogen)                                             | 570436    | 20 | <i>NID2</i>   | <i>Nid2</i>   |
| <i>nox5</i>                           | NADPH oxidase, EF-hand Ca <sup>2+</sup> binding domain 5              | 100149800 | 25 | <i>NOX5</i>   | -             |
| <i>nucb1</i>                          | nucleobindin 1                                                        | 751753    | 3  | <i>NUCB1</i>  | <i>Nucb1</i>  |
| <i>nucb2a</i>                         | nucleobindin 2a                                                       | 373078    | 7  | <i>NUCB2</i>  | <i>Nucb2</i>  |
| <i>nucb2b</i>                         | nucleobindin 2b                                                       | 326050    | 18 | <i>NUCB2</i>  | <i>Nucb2</i>  |
| <i>orai1a</i>                         | ORAI Ca <sup>2+</sup> release-activated Ca <sup>2+</sup> modulator 1a | 566671    | 8  | <i>ORAI1</i>  | <i>Orai1</i>  |
| <i>orai1b</i>                         | ORAI Ca <sup>2+</sup> release-activated Ca <sup>2+</sup> modulator 1b | 402892    | 10 | <i>ORAI1</i>  | <i>Orai1</i>  |
| <i>orai2</i>                          | ORAI Ca <sup>2+</sup> release-activated Ca <sup>2+</sup> modulator 2  | 555612    | 5  | <i>ORAI2</i>  | <i>Orai2</i>  |
| <i>ormdl1</i>                         | ORMDL sphingolipid biosynthesis regulator 1                           | 368632    | 9  | <i>ORMDL1</i> | <i>Ormdl1</i> |
| <i>ormdl2</i>                         | ORMDL sphingolipid biosynthesis regulator 2                           | 677753    | 23 | <i>ORMDL2</i> | <i>Ormdl2</i> |
| <i>ormdl3</i>                         | ORMDL sphingolipid biosynthesis regulator 3                           | 450067    | 12 | <i>ORMDL3</i> | <i>Ormdl3</i> |
| <i>pdpk1a</i>                         | 3-phosphoinositide dependent protein kinase 1a                        | 768202    | 3  | <i>PDPK1</i>  | <i>Pdpk1</i>  |
| <i>pdpk1b</i>                         | 3-phosphoinositide dependent protein kinase 1b                        | 403000    | 24 | <i>PDPK1</i>  | <i>Pdpk1</i>  |
| <i>pdzd8</i>                          | PDZ domain containing 8                                               | 561279    | 17 | <i>PDZD8</i>  | <i>Pdzd8</i>  |

|                |                                                                |           |    |               |               |
|----------------|----------------------------------------------------------------|-----------|----|---------------|---------------|
| <i>pkn1a</i>   | protein kinase N1a                                             | 560840    | 1  | <i>PKN1</i>   | <i>Pkn1</i>   |
| <i>pkn1b</i>   | protein kinase N1b                                             | 100007897 | 3  | <i>PKN1</i>   | <i>Pkn1</i>   |
| <i>pkn2</i>    | protein kinase N2                                              | 571965    | 2  | <i>PKN2</i>   | <i>Pkn2</i>   |
| <i>pkn3</i>    | protein kinase N3                                              | 323182    | 5  | <i>PKN3</i>   | <i>Pkn3</i>   |
| <i>plcb3</i>   | phospholipase C, beta 3 (phosphatidylinositol-specific)        | 100001532 | 7  | <i>PLCB3</i>  | <i>Plcb3</i>  |
| <i>plcg1</i>   | phospholipase C, gamma 1                                       | 373867    | 23 | <i>PLCG1</i>  | <i>Plcg1</i>  |
| <i>plcg2</i>   | phospholipase C, gamma 2                                       | 561747    | 18 | <i>PLCG2</i>  | <i>Plcg2</i>  |
| <i>plch1</i>   | phospholipase C, eta 1                                         | 566479    | 18 | <i>PLCH1</i>  | <i>Plch1</i>  |
| <i>plch2a</i>  | phospholipase C, eta 2a                                        | 100334231 | 8  | <i>PLCH2</i>  | <i>Plch2</i>  |
| <i>plch2b</i>  | phospholipase C, eta 2b                                        | 560919    | 11 | <i>PLCH2</i>  | <i>Plch2</i>  |
| <i>plcl1</i>   | phospholipase C like 1                                         | 563105    | 9  | <i>PLCL1</i>  | <i>Plcl1</i>  |
| <i>plcl2</i>   | phospholipase C like 2                                         | 100334276 | 16 | <i>PLCL2</i>  | <i>Plcl2</i>  |
| <i>ppef1</i>   | protein phosphatase, EF-hand Ca <sup>2+</sup> binding domain 1 | 559132    | 11 | <i>PPEF1</i>  | <i>Ppef1</i>  |
| <i>ppef2b</i>  | protein phosphatase with EF-hand domain 2b                     | 100537436 | 21 | <i>PPEF2</i>  | <i>Ppef2</i>  |
| <i>ppp1caa</i> | protein phosphatase 1, catalytic subunit, alpha isozyme a      | 407980    | 3  | <i>PPP1CA</i> | <i>Ppp1ca</i> |
| <i>ppp1cab</i> | protein phosphatase 1, catalytic subunit, alpha isozyme b      | 327301    | 12 | <i>PPP1CA</i> | <i>Ppp1ca</i> |
| <i>ppp1cb</i>  | protein phosphatase 1, catalytic subunit, beta isozyme         | 100003223 | 17 | <i>PPP1CB</i> | <i>Ppp1cb</i> |
| <i>ppp1cbl</i> | protein phosphatase 1, catalytic subunit, beta isoform, like   | 334597    | 7  | <i>PPP1CB</i> | <i>Ppp1cb</i> |
| <i>ppp1cc</i>  | protein phosphatase 1, catalytic subunit, gamma isozyme        | 571753    | 5  | <i>PPP1CC</i> | <i>Ppp1cc</i> |
| <i>prkcba</i>  | protein kinase C, beta a                                       | 100006675 | 1  | <i>PRKCB</i>  | <i>Prkcb</i>  |
| <i>prkcbb</i>  | protein kinase C, beta b                                       | 393953    | 3  | <i>PRKCB</i>  | <i>Prkcb</i>  |
| <i>prkcda</i>  | protein kinase C, delta a                                      | 334571    | 6  | <i>PRKCD</i>  | <i>Prkcd</i>  |
| <i>prkcdb</i>  | protein kinase C, delta b                                      | 100150844 | 11 | <i>PRKCD</i>  | <i>Prkcd</i>  |
| <i>prkcea</i>  | protein kinase C, epsilon a                                    | 100005075 | 12 | <i>PRKCE</i>  | <i>Prkce</i>  |
| <i>prkceb</i>  | protein kinase C, epsilon b                                    | 100332055 | 13 | <i>PRKCE</i>  | <i>Prkce</i>  |
| <i>prkcg</i>   | protein kinase C, gamma                                        | 100003514 | 16 | <i>PRKCG</i>  | <i>Prkcg</i>  |
| <i>prkcha</i>  | protein kinase C, eta, a                                       | 100144561 | 13 | <i>PRKCH</i>  | <i>Prkch</i>  |
| <i>prkchb</i>  | protein kinase C, eta, b                                       | 556591    | 20 | <i>PRKCH</i>  | <i>Prkch</i>  |
| <i>prkci</i>   | protein kinase C, iota                                         | 117507    | 2  | <i>PRKCI</i>  | <i>Prkci</i>  |
| <i>prkcq</i>   | protein kinase C, theta                                        | 555521    | 4  | <i>PRKCQ</i>  | <i>Prkcq</i>  |
| <i>prkcz</i>   | protein kinase C, zeta                                         | 555737    | 8  | <i>PRKCZ</i>  | <i>Prkcz</i>  |
| <i>psen1</i>   | presenilin 1                                                   | 30221     | 17 | <i>PSEN1</i>  | <i>Psen1</i>  |
| <i>psen2</i>   | presenilin 2                                                   | 58026     | 1  | <i>PSEN2</i>  | <i>Psen2</i>  |
| <i>pvalb1</i>  | parvalbumin 1                                                  | 402805    | 3  | -             | -             |
| <i>pvalb2</i>  | parvalbumin 2                                                  | 58028     | 12 | -             | -             |
| <i>pvalb3</i>  | parvalbumin 3                                                  | 100000771 | 12 | -             | -             |
| <i>pvalb4</i>  | parvalbumin 4                                                  | 337731    | 3  | -             | -             |
| <i>pvalb5</i>  | parvalbumin 5                                                  | 335623    | 3  | -             | -             |
| <i>pvalb6</i>  | parvalbumin 6                                                  | 402806    | 3  | <i>PVALB</i>  | <i>Pvalb</i>  |
| <i>pvalb7</i>  | parvalbumin 7                                                  | 402807    | 22 | <i>PVALB</i>  | <i>Pvalb</i>  |
| <i>pvalb8</i>  | parvalbumin 8                                                  | 360208    | 3  | -             | -             |
| <i>pvalb9</i>  | parvalbumin 9                                                  | 360209    | 12 | -             | -             |
| <i>rcn1</i>    | reticulocalbin 1, EF-hand Ca <sup>2+</sup> binding domain      | 562671    | 7  | <i>RCN1</i>   | <i>Rcn1</i>   |
| <i>rcn2</i>    | reticulocalbin 2                                               | 571340    | 18 | <i>RCN2</i>   | <i>Rcn2</i>   |
| <i>rcn3</i>    | reticulocalbin 3, EF-hand Ca <sup>2+</sup> binding domain      | 415248    | 3  | <i>RCN3</i>   | <i>Rcn3</i>   |
| <i>reps1</i>   | RALBP1 associated Eps domain containing 1                      | 564535    | 20 | <i>REPS1</i>  | <i>Reps1</i>  |
| <i>reps2</i>   | RALBP1 associated Eps domain containing 2                      | 101882936 | 23 | <i>REPS2</i>  | <i>Reps2</i>  |
| <i>ryr1a</i>   | ryanodine receptor 1a (skeletal)                               | 798565    | 10 | <i>RYR1</i>   | <i>Ryr1</i>   |
| <i>ryr1b</i>   | ryanodine receptor 1b (skeletal)                               | 570245    | 18 | <i>RYR1</i>   | <i>Ryr1</i>   |
| <i>ryr2a</i>   | ryanodine receptor 2a (cardiac)                                | 100126126 | 12 | <i>RYR2</i>   | <i>Ryr2</i>   |
| <i>ryr2b</i>   | ryanodine receptor 2b (cardiac)                                | 568463    | 17 | <i>RYR2</i>   | <i>Ryr2</i>   |
| <i>ryr3</i>    | ryanodine receptor 3                                           | 561350    | 20 | <i>RYR3</i>   | <i>Ryr3</i>   |



|                  |                                                                                      |           |    |                 |                 |
|------------------|--------------------------------------------------------------------------------------|-----------|----|-----------------|-----------------|
| <i>s100a1</i>    | S100 Ca <sup>2+</sup> binding protein A1                                             | 448856    | 16 | <i>S100A1</i>   | <i>S100a1</i>   |
| <i>s100a10a</i>  | S100 Ca <sup>2+</sup> binding protein A10a                                           | 449788    | 19 | <i>S100A10</i>  | <i>S100a10</i>  |
| <i>s100a10b</i>  | S100 Ca <sup>2+</sup> binding protein A10b                                           | 406276    | 16 | <i>S100A10</i>  | <i>S100a10</i>  |
| <i>s100a11</i>   | S100 Ca <sup>2+</sup> binding protein A11                                            | 100307070 | 19 | <i>S100A11</i>  | <i>S100a11</i>  |
| <i>s100b</i>     | S100 Ca <sup>2+</sup> binding protein, beta (neural)                                 | 436825    | 22 | <i>S100B</i>    | <i>S100b</i>    |
| <i>s100s</i>     | S100 Ca <sup>2+</sup> binding protein S                                              | 445481    | 19 | -               | -               |
| <i>s100t</i>     | S100 Ca <sup>2+</sup> binding protein T                                              | 541368    | 16 | -               | -               |
| <i>s100u</i>     | S100 Ca <sup>2+</sup> binding protein U                                              | 563060    | 19 | -               | -               |
| <i>s100v2</i>    | S100 Ca <sup>2+</sup> binding protein V2                                             | 336965    | 19 | -               | -               |
| <i>s100w</i>     | S100 Ca <sup>2+</sup> binding protein W                                              | 569958    | 16 | -               | -               |
| <i>s100z</i>     | S100 Ca <sup>2+</sup> binding protein Z                                              | 554089    | 21 | <i>S100Z</i>    | <i>S100z</i>    |
| <i>saraf</i>     | store-operated Ca <sup>2+</sup> entry-associated regulatory factor                   | 767649    | 1  | <i>SARAF</i>    | <i>Saraf</i>    |
| <i>scgn</i>      | secretagoin, EF-hand Ca <sup>2+</sup> binding protein                                | 573010    | 16 | <i>SCGN</i>     | <i>Scgn</i>     |
| <i>sgca</i>      | sarcoglycan, alpha                                                                   | 557170    | 12 | <i>SGCA</i>     | <i>Sgca</i>     |
| <i>sgcb</i>      | sarcoglycan, beta (dystrophin-associated glycoprotein)                               | 559788    | 20 | <i>SGCB</i>     | <i>Sgcb</i>     |
| <i>sgcd</i>      | sarcoglycan, delta (dystrophin-associated glycoprotein)                              | 324961    | 21 | <i>SGCD</i>     | <i>Sgcd</i>     |
| <i>sgce</i>      | sarcoglycan, epsilon                                                                 | 368230    | 19 | <i>SGCE</i>     | <i>Sgce</i>     |
| <i>sgcg</i>      | sarcoglycan, gamma                                                                   | 445292    | 15 | <i>SGCG</i>     | <i>Sgcg</i>     |
| <i>sgcz</i>      | sarcoglycan, zeta                                                                    | 100334126 | 1  | <i>SGCZ</i>     | <i>Sgcz</i>     |
| <i>sgk1</i>      | serum/glucocorticoid regulated kinase 1                                              | 324140    | 23 | <i>SGK1</i>     | <i>SGK1</i>     |
| <i>sgk2a</i>     | serum/glucocorticoid regulated kinase 2a                                             | 570956    | 23 | <i>SGK2</i>     | <i>Sgk2</i>     |
| <i>sgk2b</i>     | serum/glucocorticoid regulated kinase 2b                                             | 559050    | 16 | <i>SGK2</i>     | <i>Sgk2</i>     |
| <i>sgk3</i>      | serum/glucocorticoid regulated kinase family, member 3                               | 564523    | 24 | <i>SGK3</i>     | <i>Sgk3</i>     |
| <i>sigmar1</i>   | sigma non-opioid intracellular receptor 1                                            | 393952    | 10 | <i>SIGMAR1</i>  | <i>Sigmar1</i>  |
| <i>slc24a1</i>   | solute carrier family 24 (sodium/potassium/Ca <sup>2+</sup> exchanger), member 1     | 558299    | 18 | <i>SLC24A1</i>  | <i>Slc24a1</i>  |
| <i>slc24a2</i>   | solute carrier family 24 (sodium/potassium/Ca <sup>2+</sup> exchanger), member 2     | 751686    | 1  | <i>SLC24A2</i>  | <i>Slc24a2</i>  |
| <i>slc24a3</i>   | solute carrier family 24 (sodium/potassium/Ca <sup>2+</sup> exchanger), member 3     | 557196    | 13 | <i>SLC24A3</i>  | <i>Slc24a3</i>  |
| <i>slc24a4a</i>  | solute carrier family 24 (sodium/potassium/Ca <sup>2+</sup> exchanger), member 4a    | 550467    | 17 | <i>SLC24A4</i>  | <i>Slc24a4</i>  |
| <i>slc24a4b</i>  | solute carrier family 24 (sodium/potassium/Ca <sup>2+</sup> exchanger), member 4b    | 100334346 | 20 | <i>SLC24A4</i>  | <i>Slc24a4</i>  |
| <i>slc24a5</i>   | solute carrier family 24 (sodium/potassium/Ca <sup>2+</sup> exchanger), member 5     | 570312    | 18 | <i>SLC24A5</i>  | <i>Slc24a5</i>  |
| <i>slc24a6a</i>  | solute carrier family 24 (sodium/potassium/Ca <sup>2+</sup> exchanger), member 6a    | 561209    | 14 | -               | -               |
| <i>slc25a12</i>  | solute carrier family 25 (aspartate/glutamate carrier), member 12                    | 337675    | 6  | <i>SLC25A12</i> | <i>Slc25a12</i> |
| <i>slc25a19</i>  | solute carrier family 25 (mitochondrial thiamine pyrophosphate carrier), member 19   | 403024    | 3  | <i>SLC25A19</i> | <i>Slc25a19</i> |
| <i>slc25a23a</i> | solute carrier family 25 (mitochondrial carrier; phosphate carrier), member 23a      | 561939    | 1  | <i>SLC25A23</i> | <i>Slc25a23</i> |
| <i>slc25a23b</i> | solute carrier family 25 (mitochondrial carrier; phosphate carrier), member 23b      | 561087    | 3  | <i>SLC25A23</i> | <i>Slc25a23</i> |
| <i>slc25a24</i>  | solute carrier family 25 (mitochondrial carrier; phosphate carrier), member 24       | 447867    | 20 | <i>SLC25A24</i> | <i>Slc25a2-</i> |
| <i>slc25a24l</i> | solute carrier family 25 (mitochondrial carrier; phosphate carrier), member 24, like | 678557    | 2  | <i>SLC25A25</i> | <i>Slc25a25</i> |
| <i>slc25a25a</i> | solute carrier family 25 (mitochondrial carrier; phosphate carrier), member 25a      | 406541    | 8  | <i>SLC25A25</i> | <i>Slc25a25</i> |
| <i>slc25a25b</i> | solute carrier family 25 (mitochondrial carrier; phosphate carrier), member 25b      | 569227    | 5  | <i>SLC25A25</i> | <i>Slc25a25</i> |
| <i>slc25a28</i>  | solute carrier family 25 (mitochondrial iron transporter), member 28                 | 100535877 | 13 | <i>SLC25A28</i> | <i>Slc25a28</i> |
| <i>slc25a37</i>  | solute carrier family 25 (mitochondrial iron transporter), member 37                 | 387000    | 8  | <i>SLC25A37</i> | <i>Slc25a37</i> |
| <i>slc25a39</i>  | solute carrier family 25, member 39                                                  | 393458    | 3  | <i>SLC25A39</i> | <i>Slc25a39</i> |
| <i>slc25a42</i>  | solute carrier family 25, member 42                                                  | 751743    | 2  | <i>SLC25A42</i> | <i>Slc25a42</i> |
| <i>slc25a43</i>  | solute carrier family 25, member 43                                                  | 796731    | 14 | <i>SLC25A43</i> | <i>Slc25a43</i> |
| <i>slc8a1a</i>   | solute carrier family 8 (sodium/Ca <sup>2+</sup> exchanger), member 1a               | 553489    | 11 | <i>SLC8A1</i>   | <i>Slc8a1</i>   |
| <i>slc8a1b</i>   | solute carrier family 8 (sodium/Ca <sup>2+</sup> exchanger), member 1b               | 797199    | 17 | <i>SLC8A1</i>   | <i>Slc8a1</i>   |
| <i>slc8a2a</i>   | solute carrier family 8 (sodium/Ca <sup>2+</sup> exchanger), member 2a               | 569480    | 5  | <i>SLC8A2</i>   | <i>Slc8a2</i>   |

|                 |                                                                                         |           |    |                |                |
|-----------------|-----------------------------------------------------------------------------------------|-----------|----|----------------|----------------|
| <i>slc8a2b</i>  | solute carrier family 8 (sodium/Ca <sup>2+</sup> exchanger), member 2b                  | 567212    | 15 | <i>SLC8A2</i>  | <i>Slc8a2</i>  |
| <i>slc8a3</i>   | solute carrier family 8 (sodium/Ca <sup>2+</sup> exchanger), member 3                   | 560561    | 13 | <i>SLC8A3</i>  | <i>Slc8a3</i>  |
| <i>slc8a4a</i>  | solute carrier family 8 (sodium/Ca <sup>2+</sup> exchanger), member 4a                  | 568512    | 21 | -              | -              |
| <i>slc8a4b</i>  | solute carrier family 8 (sodium/Ca <sup>2+</sup> exchanger), member 4b                  | 557499    | 7  | -              | -              |
| <i>slc8b1</i>   | solute carrier family 8 (sodium/lithium/Ca <sup>2+</sup> exchanger), member B1          | 560601    | 7  | <i>SLC8B1</i>  | <i>Slc8b1</i>  |
| <i>smdt1b</i>   | single-pass membrane protein with aspartate-rich tail 1b                                | 100000862 | 1  | <i>SMDT1</i>   | <i>Smdt1</i>   |
| <i>smoc1</i>    | SPARC related modular Ca <sup>2+</sup> binding 1                                        | 100529120 | 17 | <i>SMOC1</i>   | <i>Smoc1</i>   |
| <i>smoc2</i>    | SPARC related modular Ca <sup>2+</sup> binding 2                                        | 266988    | 13 | <i>SMOC2</i>   | <i>SMOC2</i>   |
| <i>srl</i>      | sarcalumenin                                                                            | 449670    | 3  | <i>SRL</i>     | <i>Srl</i>     |
| <i>ssr1</i>     | signal sequence receptor, alpha                                                         | 373100    | 24 | <i>SSR1</i>    | <i>Ssr1</i>    |
| <i>stim1a</i>   | stromal interaction molecule 1a                                                         | 556360    | 15 | <i>STIM1</i>   | <i>Stim1</i>   |
| <i>stim1b</i>   | stromal interaction molecule 1b                                                         | 100005700 | 21 | <i>STIM1</i>   | <i>Stim1</i>   |
| <i>stim2a</i>   | stromal interaction molecule 2a                                                         | 100334881 | 1  | <i>STIM2</i>   | <i>Stim2</i>   |
| <i>stim2b</i>   | stromal interaction molecule 2b                                                         | 563901    | 7  | <i>STIM2</i>   | <i>Stim2</i>   |
| <i>stimate</i>  | STIM activating enhance                                                                 | 393439    | 8  | <i>STIMATE</i> | <i>Stimate</i> |
| <i>stk32a</i>   | serine/threonine kinase 32A                                                             | 100330817 | 21 | <i>STK32A</i>  | <i>Stk32a</i>  |
| <i>stk38a</i>   | serine/threonine kinase 38a                                                             | 406765    | 8  | <i>STK38</i>   | <i>Stk38</i>   |
| <i>stk38b</i>   | serine/threonine kinase 38b                                                             | 100332206 | 22 | <i>STK38</i>   | <i>Stk38</i>   |
| <i>stk38l</i>   | serine/threonine kinase 38 like                                                         | 393957    | 4  | <i>STK38L</i>  | <i>Stk38l</i>  |
| <i>tdgf1</i>    | teratocarcinoma-derived growth factor 1                                                 | 30304     | 10 | <i>TDGF1</i>   | <i>Tdgf1</i>   |
| <i>tenm1</i>    | teneurin transmembrane protein 1                                                        | 563094    | 5  | <i>TENM1</i>   | <i>Tenm1</i>   |
| <i>tenm3</i>    | teneurin transmembrane protein 3                                                        | 30155     | 1  | -              | -              |
| <i>tenm4</i>    | teneurin transmembrane protein 4                                                        | 30156     | 15 | <i>TENM4</i>   | <i>Tenm4</i>   |
| <i>thbd</i>     | thrombomodulin                                                                          | 108180329 | 20 | <i>THBD</i>    | <i>Thbd</i>    |
| <i>tmbim1a</i>  | transmembrane BAX inhibitor motif containing 1a                                         | 449819    | 6  | <i>TMBIM1</i>  | <i>Tmbim1</i>  |
| <i>tmbim4</i>   | transmembrane BAX inhibitor motif containing 4                                          | 406412    | 4  | <i>TMBIM4</i>  | <i>Tmbim4</i>  |
| <i>tmx1</i>     | thioredoxin-related transmembrane protein 1                                             | 323607    | 13 | <i>TMX1</i>    | <i>Tmx1</i>    |
| <i>tnnc1a</i>   | troponin C type 1a (slow)                                                               | 353247    | 23 | <i>TNNC1</i>   | <i>Tnnc1</i>   |
| <i>tnnc1b</i>   | troponin C type 1b (slow)                                                               | 415175    | 23 | <i>TNNC1</i>   | <i>Tnnc1</i>   |
| <i>tpcn1</i>    | two pore segment channel 1                                                              | 567534    | 5  | <i>TPCN1</i>   | <i>Tpcn1</i>   |
| <i>tpcn2</i>    | two pore segment channel 2                                                              | 777614    | 7  | <i>TPCN2</i>   | <i>Tpcn2</i>   |
| <i>tpcn3</i>    | two pore segment channel 3                                                              | 557460    | 1  | -              | -              |
| <i>trpa1a</i>   | transient receptor potential cation channel, subfamily A, member 1a                     | 474351    | 2  | <i>TRPA1</i>   | <i>Trpa1</i>   |
| <i>trpa1b</i>   | transient receptor potential cation channel, subfamily A, member 1b                     | 474353    | 24 | <i>TRPA1</i>   | <i>Trpa1</i>   |
| <i>trpc1</i>    | transient receptor potential cation channel, subfamily C, member 1                      | 570841    | 24 | <i>TRPC1</i>   | <i>Trpc1</i>   |
| <i>trpc2a</i>   | transient receptor potential cation channel subfamily C member 2a                       | 559914    | 15 | -              | <i>Trpc2</i>   |
| <i>trpc2b</i>   | transient receptor potential cation channel subfamily C member 2b                       | 562120    | 21 | <i>TRPC2</i>   | <i>Trpc2</i>   |
| <i>trpc3</i>    | transient receptor potential cation channel, subfamily C, member 3                      | 101887082 | 14 | <i>TRPC3</i>   | <i>Trpc3</i>   |
| <i>trpc4a</i>   | transient receptor potential cation channel, subfamily C, member 4a                     | 102725537 | 10 | <i>TRPC4</i>   | <i>Trpc4</i>   |
| <i>trpc4b</i>   | transient receptor potential cation channel, subfamily C, member 4b                     | 102725536 | 15 | <i>TRPC4</i>   | <i>Trpc4</i>   |
| <i>trpc5a</i>   | transient receptor potential cation channel, subfamily C, member 5a                     | 557456    | 1  | <i>TRPC5</i>   | <i>Trpc5</i>   |
| <i>trpc5b</i>   | transient receptor potential cation channel, subfamily C, member 5b                     | 559586    | 21 | <i>TRPC5</i>   | <i>Trpc5</i>   |
| <i>trpc6a</i>   | transient receptor potential cation channel, subfamily C, member 6a                     | 563989    | 21 | <i>TRPC6</i>   | <i>Trpc6</i>   |
| <i>trpc6b</i>   | transient receptor potential cation channel, subfamily C, member 6b                     | 102725535 | 18 | <i>TRPC6</i>   | <i>Trpc6</i>   |
| <i>trpc7a</i>   | transient receptor potential cation channel, subfamily C, member 7a                     | 567566    | 10 | <i>TRPC7</i>   | <i>Trpc7</i>   |
| <i>trpc7b</i>   | transient receptor potential cation channel, subfamily C, member 7b                     | 102725540 | 14 | <i>TRPC7</i>   | <i>Trpc7</i>   |
| <i>trpm1a</i>   | transient receptor potential cation channel, subfamily M, member 1a                     | 791196    | 7  | <i>TRPM1</i>   | <i>Trpm1</i>   |
| <i>trpm1b</i>   | transient receptor potential cation channel, subfamily M, member 1b                     | 569946    | 25 | <i>TRPM1</i>   | <i>Trpm1</i>   |
| <i>trpm2</i>    | transient receptor potential cation channel, subfamily M, member 2                      | 799412    | 9  | <i>TRPM2</i>   | <i>Trpm2</i>   |
| <i>trpm3</i>    | transient receptor potential cation channel, subfamily M, member 3                      | 565807    | 5  | <i>TRPM3</i>   | <i>Trpm3</i>   |
| <i>trpm4a</i>   | transient receptor potential cation channel, subfamily M, member 4a                     | 100004946 | 3  | <i>TRPM4</i>   | <i>Trpm4</i>   |
| <i>trpm4b.1</i> | transient receptor potential cation channel, subfamily M, member 4b, tandem duplicate 1 | 102659287 | 12 | <i>TRPM4</i>   | <i>Trpm4</i>   |

|                 |                                                                                         |           |    |              |              |
|-----------------|-----------------------------------------------------------------------------------------|-----------|----|--------------|--------------|
| <i>trpm4b.2</i> | transient receptor potential cation channel, subfamily M, member 4b, tandem duplicate 2 | 799647    | 12 | <i>TRPM4</i> | <i>Trpm4</i> |
| <i>trpm5</i>    | transient receptor potential cation channel, subfamily M, member 5                      | 557722    | 7  | <i>TRPM5</i> | <i>Trpm5</i> |
| <i>trpm6</i>    | transient receptor potential cation channel, subfamily M, member 6                      | 100149353 | 5  | <i>TRPM6</i> | <i>Trpm6</i> |
| <i>trpm7</i>    | transient receptor potential cation channel, subfamily M, member 7                      | 280653    | 18 | <i>TRPM7</i> | <i>Trpm7</i> |
| <i>trpn1</i>    | transient receptor potential cation channel, subfamily N, member 1                      | 368273    | 19 | -            | -            |
| <i>trpv1</i>    | transient receptor potential cation channel, subfamily V, member 1                      | 561195    | 5  | <i>TRPV1</i> | <i>Trpv1</i> |
| <i>trpv4</i>    | transient receptor potential cation channel, subfamily V, member 4                      | 557850    | 5  | <i>TRPV4</i> | <i>Trpv4</i> |
| <i>trpv6</i>    | transient receptor potential cation channel, subfamily V, member 6                      | 100000322 | 16 | <i>TRPV6</i> | <i>Trpv6</i> |
| <i>ttc9b</i>    | tetratricopeptide repeat domain 9B                                                      | 559732    | 18 | <i>TTC9B</i> | <i>Ttc9b</i> |
| <i>ttc9c</i>    | tetratricopeptide repeat domain 9C                                                      | 393235    | 14 | <i>TTC9C</i> | <i>Ttc9c</i> |
| <i>tusc2a</i>   | tumor suppressor 2, mitochondrial Ca <sup>2+</sup> regulator a                          | 768156    | 6  | <i>TUSC2</i> | <i>Tusc2</i> |
| <i>tusc2b</i>   | tumor suppressor 2, mitochondrial Ca <sup>2+</sup> regulator b                          | 436675    | 22 | <i>TUSC2</i> | <i>Tusc2</i> |
| <i>vdac1</i>    | voltage-dependent anion channel 1                                                       | 334582    | 21 | <i>VDAC1</i> | <i>Vdac1</i> |
| <i>vdac2</i>    | voltage-dependent anion channel 2                                                       | 322126    | 13 | <i>VDAC2</i> | <i>Vdac2</i> |
| <i>vdac3</i>    | voltage-dependent anion channel 2                                                       | 406529    | 8  | <i>VDAC3</i> | <i>Vdac3</i> |
| <i>vwde</i>     | von Willebrand factor D and EGF domains                                                 | 767804    | 15 | <i>VWDE</i>  | <i>Vwde</i>  |
| <i>wdr74</i>    | WD repeat domain 74                                                                     | 558996    | 10 | <i>WDR74</i> | <i>Wdr74</i> |
| <i>wfs1a</i>    | Wolfram syndrome 1a (wolframin)                                                         | 566876    | 1  | <i>WFS1</i>  | <i>Wfs1</i>  |
| <i>wif1</i>     | wnt inhibitory factor 1                                                                 | 30476     | 4  | <i>WIF1</i>  | <i>Wif1</i>  |

**Table S3 Zebrafish brain Calcium Toolkit**

The list of 444 genes from zebrafish CaTK detected by RNA-Seq in brain samples. Expression data and zebrafish mutant phenotype sections contain references to appropriate publications if available. Adult brain and larvae head expression contain data regarding the relative level of mRNA of 77 genes (in bold) estimated using RT-PCR arrays expressed as VERY LOW, LOW, MEDIUM or HIGH (this dataset was submitted to the [Gene Expression Omnibus](#) database). “-” stands for no data available. The genes in bold and underlined are those used to validate the RT-PCR assay. RPM (Reads Per Million Reads) values obtain from RNA-seq experiment are placed in the brackets.

| gene symbol    | human ortholog | location | biological process                                                                                                                                                                                                     | molecular function                                                                                                                                                              | zebrafish mutant phenotype                                                                                                                                                                                                                         | expression data (RPM)   |                        |
|----------------|----------------|----------|------------------------------------------------------------------------------------------------------------------------------------------------------------------------------------------------------------------------|---------------------------------------------------------------------------------------------------------------------------------------------------------------------------------|----------------------------------------------------------------------------------------------------------------------------------------------------------------------------------------------------------------------------------------------------|-------------------------|------------------------|
|                |                |          |                                                                                                                                                                                                                        |                                                                                                                                                                                 |                                                                                                                                                                                                                                                    | adult brain expression  | larvae head expression |
| <i>aif1l</i>   | <i>AIF1L</i>   | C        | actin filament bundle assembly, ruffle assembly                                                                                                                                                                        | actin filament binding, Ca <sup>2+</sup> binding                                                                                                                                | -                                                                                                                                                                                                                                                  | [1]<br><b>(44.38)</b>   |                        |
| <i>akt1</i>    | <i>AKT1</i>    | PM/C/N   | intracellular signal transduction, negative regulation of neuron differentiation, protein phosphorylation                                                                                                              |                                                                                                                                                                                 | malformed brain, edematous pericardium, bent trunk, decreased number of neuroblast [2]                                                                                                                                                             | [2]<br><b>(5.84)</b>    |                        |
| <i>akt2</i>    | <i>AKT2</i>    | PM/C/N   | bone development, glucose homeostasis, intracellular signal transduction, negative regulation of apoptotic process, peptidyl-serine phosphorylation, positive regulation of glucose import, protein kinase B signaling | ATP binding, protein serine/threonine kinase activity, transferase activity                                                                                                     | decreased body length and weight, abnormal fins development, increased amount of blood glucose, decreased rate of glucose import, decreased <i>ins</i> and <i>apoa4a</i> expression, increased <i>mlxipl</i> expression, increased apoptosis [3,4] | [4]<br><b>(57.93)</b>   |                        |
| <i>akt3b</i>   | <i>AKT3</i>    | PM/C/N   | protein phosphorylation                                                                                                                                                                                                |                                                                                                                                                                                 | -                                                                                                                                                                                                                                                  | <b>(39.5)</b>           |                        |
| <i>ano1</i>    | <i>ANO1</i>    | PM       | cellular response to heat, chloride transmembrane transport, positive regulation of insulin secretion involved in cellular response to glucose stimulus                                                                | protein dimerization activity                                                                                                                                                   | -                                                                                                                                                                                                                                                  | <b>(50.59)</b>          |                        |
| <i>anxa11a</i> | <i>ANXA11</i>  | C        | cytokinetic process, phagocytosis, response to Ca <sup>2+</sup>                                                                                                                                                        | S100 protein binding, Ca <sup>2+</sup> binding, Ca <sup>2+</sup> -dependent phospholipid binding, Ca <sup>2+</sup> -dependent protein binding, phosphatidylethanolamine binding | -                                                                                                                                                                                                                                                  | [1,5]<br><b>(09.03)</b> |                        |
| <i>anxa11b</i> | <i>ANXA11</i>  | C        |                                                                                                                                                                                                                        |                                                                                                                                                                                 | -                                                                                                                                                                                                                                                  | [1,5]<br><b>(42.17)</b> |                        |
| <i>anxa13</i>  | <i>ANXA13</i>  | PM/N     | positive regulation of Golgi to plasma membrane protein transport                                                                                                                                                      | Ca <sup>2+</sup> binding, Ca <sup>2+</sup> -dependent phospholipid binding, phosphatidylglycerol binding, phosphatidylserine binding                                            | -                                                                                                                                                                                                                                                  | [6]<br><b>(51.17)</b>   |                        |
| <i>anxa13l</i> | <i>ANXA13</i>  | PM/N     |                                                                                                                                                                                                                        |                                                                                                                                                                                 | -                                                                                                                                                                                                                                                  | [7]<br><b>(23.89)</b>   |                        |

|               |       |          |                                                                                                                                                                                                                                                                                                                                                                                                                                                                                                                                                                                                                                                                                                                                                                                                                                                                                                                            |                                                                                                                                                                                                                                                                            |                                              |         |           |
|---------------|-------|----------|----------------------------------------------------------------------------------------------------------------------------------------------------------------------------------------------------------------------------------------------------------------------------------------------------------------------------------------------------------------------------------------------------------------------------------------------------------------------------------------------------------------------------------------------------------------------------------------------------------------------------------------------------------------------------------------------------------------------------------------------------------------------------------------------------------------------------------------------------------------------------------------------------------------------------|----------------------------------------------------------------------------------------------------------------------------------------------------------------------------------------------------------------------------------------------------------------------------|----------------------------------------------|---------|-----------|
| <i>anxa1a</i> | ANXA1 | EM/PM    | DNA duplex unwinding, G protein-coupled receptor signaling pathway, coupled to cyclic nucleotide second messenger, actin cytoskeleton reorganization, alpha-beta T cell differentiation, arachidonic acid secretion, cell surface receptor signaling pathway, cellular response to glucocorticoid stimulus, cellular response to hydrogen peroxide, cellular response to vascular endothelial growth factor stimulus, endocrine pancreas development, fin regeneration, gliogenesis, granulocyte and monocyte chemotaxis, hepatocyte differentiation, inflammatory response, insulin secretion, keratinocyte differentiation, myoblast migration involved in skeletal muscle regeneration, negative regulation of T-helper 2 cell differentiation, negative regulation of exocytosis, negative regulation of interleukin-8 secretion, negative regulation of phospholipase A2 activity, neutrophil clearance, phagocytosis |                                                                                                                                                                                                                                                                            | -                                            | (2.26)  | [5,7]     |
| <i>anxa1b</i> | ANXA1 | EM/PM    |                                                                                                                                                                                                                                                                                                                                                                                                                                                                                                                                                                                                                                                                                                                                                                                                                                                                                                                            | DNA/DNA annealing activity, Ca <sup>2+</sup> binding, Ca <sup>2+</sup> -dependent phospholipid binding, Ca <sup>2+</sup> -dependent protein binding, double-stranded DNA-dependent ATPase activity, phospholipase A2 inhibitor activity, protein homodimerization activity | -                                            | (0.27)  | [5,7,8]   |
| <i>anxa1c</i> | ANXA1 | EM/PM    |                                                                                                                                                                                                                                                                                                                                                                                                                                                                                                                                                                                                                                                                                                                                                                                                                                                                                                                            |                                                                                                                                                                                                                                                                            | -                                            | (0.14)  | [1]       |
| <i>anxa2a</i> | ANXA2 | EM/PM    | -                                                                                                                                                                                                                                                                                                                                                                                                                                                                                                                                                                                                                                                                                                                                                                                                                                                                                                                          | Ca <sup>2+</sup> binding, Ca <sup>2+</sup> -dependent phospholipid binding, cytoskeletal protein binding, phospholipase inhibitor activity                                                                                                                                 | -                                            | (21.12) | [5,7]     |
| <i>anxa4</i>  | ANXA4 | PM/N/C   | -                                                                                                                                                                                                                                                                                                                                                                                                                                                                                                                                                                                                                                                                                                                                                                                                                                                                                                                          |                                                                                                                                                                                                                                                                            | increased apoptotic process in the liver [9] | (3.35)  | [9]       |
| <i>anxa5a</i> | ANXA5 | EM/PM /C | negative regulation of coagulation, regulation of cell motility                                                                                                                                                                                                                                                                                                                                                                                                                                                                                                                                                                                                                                                                                                                                                                                                                                                            | Ca <sup>2+</sup> binding, Ca <sup>2+</sup> -dependent phospholipid binding                                                                                                                                                                                                 | -                                            | (0.41)  | [10,11]   |
| <i>anxa5b</i> | ANXA5 | EM/PM /C |                                                                                                                                                                                                                                                                                                                                                                                                                                                                                                                                                                                                                                                                                                                                                                                                                                                                                                                            |                                                                                                                                                                                                                                                                            | -                                            | (2.26)  | [1,12,13] |

|                |                |      |                                                                                                                                                                                                                                                                                                                                                                   |                                                                                                                                                                                                                                                                                                                                                                                                                                                       |                                                                                                                                                                                                                                                  |                     |          |
|----------------|----------------|------|-------------------------------------------------------------------------------------------------------------------------------------------------------------------------------------------------------------------------------------------------------------------------------------------------------------------------------------------------------------------|-------------------------------------------------------------------------------------------------------------------------------------------------------------------------------------------------------------------------------------------------------------------------------------------------------------------------------------------------------------------------------------------------------------------------------------------------------|--------------------------------------------------------------------------------------------------------------------------------------------------------------------------------------------------------------------------------------------------|---------------------|----------|
| <i>anxa6</i>   | ANXA6          | C    | apoptotic signaling pathway, biomineral tissue development, Ca <sup>2+</sup> import, growth plate cartilage chondrocyte differentiation, mitochondrial Ca <sup>2+</sup> homeostasis, negative regulation of sequestering of Ca <sup>2+</sup> , neural crest cell migration, plasma membrane repair, protein homooligomerization, regulation of muscle contraction | GTP binding, actin filament binding, Ca <sup>2+</sup> channel activity, Ca <sup>2+</sup> binding, Ca <sup>2+</sup> -dependent phospholipid binding, Ca <sup>2+</sup> -dependent protein binding, cholesterol binding, chondroitin sulfate binding, enzyme binding, heparin binding, ligand-gated ion channel activity, phosphatidylserine binding, protein homodimerization activity, protein-containing complex binding, signaling receptor activity | muscle cell myofibril damaged, muscle T-tubule misaligned, curved trunk [5]                                                                                                                                                                      | [5,7]<br>(9.46)     |          |
| <i>apba1a</i>  | <i>APBA1</i>   | PM   | chemical synaptic transmission, protein-containing complex assembly                                                                                                                                                                                                                                                                                               | amyloid-beta binding                                                                                                                                                                                                                                                                                                                                                                                                                                  | -                                                                                                                                                                                                                                                | LOW (56.07)         | VERY LOW |
| <i>apba1b</i>  | <i>APBA1</i>   | PM   | chemical synaptic transmission                                                                                                                                                                                                                                                                                                                                    |                                                                                                                                                                                                                                                                                                                                                                                                                                                       | -                                                                                                                                                                                                                                                | LOW (94.17)         | VERY LOW |
| <i>apba2a</i>  | <i>APBA2</i>   | PM   |                                                                                                                                                                                                                                                                                                                                                                   |                                                                                                                                                                                                                                                                                                                                                                                                                                                       | -                                                                                                                                                                                                                                                | (58.53)             |          |
| <i>apba2b</i>  | <i>APBA2</i>   | PM   |                                                                                                                                                                                                                                                                                                                                                                   |                                                                                                                                                                                                                                                                                                                                                                                                                                                       | -                                                                                                                                                                                                                                                | LOW (202.76)        | VERY LOW |
| <i>apbb1</i>   | <i>APBB1</i>   | C    | regulation of transcription, DNA-templated                                                                                                                                                                                                                                                                                                                        | amyloid-beta binding, transcription factor binding                                                                                                                                                                                                                                                                                                                                                                                                    | -                                                                                                                                                                                                                                                | VERY LOW (38.20)    | VERY LOW |
| <i>apbb1ip</i> | <i>APBB1IP</i> | C/PM | signal transduction                                                                                                                                                                                                                                                                                                                                               | -                                                                                                                                                                                                                                                                                                                                                                                                                                                     | -                                                                                                                                                                                                                                                | [7]<br>(1.84)       |          |
| <i>apbb2b</i>  | <i>APBB2</i>   | C    | regulation of transcription, DNA-templated                                                                                                                                                                                                                                                                                                                        | amyloid-beta binding, transcription factor binding                                                                                                                                                                                                                                                                                                                                                                                                    | -                                                                                                                                                                                                                                                | MEDIUM (40.42)      | LOW      |
| <i>apbb3</i>   | <i>APBB3</i>   | C    | -                                                                                                                                                                                                                                                                                                                                                                 | -                                                                                                                                                                                                                                                                                                                                                                                                                                                     | -                                                                                                                                                                                                                                                | VERY LOW (27.94)    | VERY LOW |
| <i>atox1</i>   | <i>ATOX1</i>   | C    | cellular copper ion homeostasis, metal ion transport, response to oxidative stress                                                                                                                                                                                                                                                                                | copper chaperone activity, metal ion binding                                                                                                                                                                                                                                                                                                                                                                                                          | -                                                                                                                                                                                                                                                | MEDIUM (7.41)       | HIGH     |
| <i>atp2a1</i>  | <i>ATP2A1</i>  | ER   | Ca <sup>2+</sup> transmembrane transport, cellular Ca <sup>2+</sup> homeostasis, negative regulation of muscle contraction, response to mechanical stimulus                                                                                                                                                                                                       | Ca <sup>2+</sup> transporting ATPase activity, proton-exporting ATPase activity, phosphorylative mechanism                                                                                                                                                                                                                                                                                                                                            | abnormal locomotion behavior, skeletal muscle contraction disrupted, thigmotaxis disrupted, fast muscle cell skeletal muscle myofibril disorganized, abnormal notochord, bent trunk, neuromuscular process controlling balance disrupted [14-16] | [1,17-19]<br>(1.36) |          |
| <i>atp2a1l</i> | <i>ATP2A1</i>  | ER   | Ca <sup>2+</sup> transmembrane transport, cellular Ca <sup>2+</sup> homeostasis                                                                                                                                                                                                                                                                                   |                                                                                                                                                                                                                                                                                                                                                                                                                                                       | -                                                                                                                                                                                                                                                | (0.22)              |          |

|                 |                |    |                                                                                                                                                                                                                                                                                                                         |                                                                                                                                                    |                                                                                                                                                                                                                           |                                |
|-----------------|----------------|----|-------------------------------------------------------------------------------------------------------------------------------------------------------------------------------------------------------------------------------------------------------------------------------------------------------------------------|----------------------------------------------------------------------------------------------------------------------------------------------------|---------------------------------------------------------------------------------------------------------------------------------------------------------------------------------------------------------------------------|--------------------------------|
| <i>atp2a2a</i>  | <i>ATP2A2</i>  | ER | Ca <sup>2+</sup> transmembrane transport, cellular Ca <sup>2+</sup> homeostasis, heart looping, regulation of heart contraction                                                                                                                                                                                         | Ca <sup>2+</sup> transporting ATPase activity, proton-exporting ATPase activity, phosphorylative mechanism                                         | atrium and cardiac ventricle collapsed, decreased atrium and cardiac ventricle contractility, heart contraction decreased rate, heart looping arrested, pericardium edematous, sensory perception of touch disrupted [20] | [7,20]<br><b>(74.48)</b>       |
| <i>atp2a2b</i>  | <i>ATP2A2</i>  | ER | Ca <sup>2+</sup> transmembrane transport, cellular Ca <sup>2+</sup> homeostasis                                                                                                                                                                                                                                         |                                                                                                                                                    | -                                                                                                                                                                                                                         | [6]<br><b>(153.59)</b>         |
| <i>atp2a3</i>   | <i>ATP2A3</i>  | ER | Ca <sup>2+</sup> transmembrane transport, cellular Ca <sup>2+</sup> homeostasis                                                                                                                                                                                                                                         |                                                                                                                                                    | -                                                                                                                                                                                                                         | [21]<br><b>(188.56)</b>        |
| <i>atp2b1a</i>  | <i>ATP2B1</i>  | PM | bone mineralization, Ca <sup>2+</sup> transmembrane transport, cellular Ca <sup>2+</sup> homeostasis, inner ear receptor cell development, otolith development, posterior lateral line neuromast development, regulation of cytosolic Ca <sup>2+</sup> concentration, sensory perception of sound, tooth mineralization | Ca <sup>2+</sup> transporting ATPase activity, PDZ domain binding                                                                                  | abnormal tooth mineralization, posterior lateral and otolith development, disrupted bone mineralization, abnormal sensory perception of sound, integument ionocyte morphology [22-24]                                     | [1,7,17,25]<br><b>(207.85)</b> |
| <i>atp2b1b</i>  | <i>ATP2B1</i>  | PM | Ca <sup>2+</sup> transmembrane transport, cellular Ca <sup>2+</sup> homeostasis, neuron differentiation, regulation of cytosolic Ca <sup>2+</sup> concentration                                                                                                                                                         |                                                                                                                                                    | -                                                                                                                                                                                                                         | [25]<br><b>(4.76)</b>          |
| <i>atp2b2</i>   | <i>ATP2B</i>   | PM |                                                                                                                                                                                                                                                                                                                         |                                                                                                                                                    | -                                                                                                                                                                                                                         | [25]<br><b>(365.62)</b>        |
| <i>atp2b3a</i>  | <i>ATP2B3</i>  | PM |                                                                                                                                                                                                                                                                                                                         |                                                                                                                                                    | -                                                                                                                                                                                                                         | [7,25]<br><b>(415.37)</b>      |
| <i>atp2b3b</i>  | <i>ATP2B3</i>  | PM |                                                                                                                                                                                                                                                                                                                         |                                                                                                                                                    | -                                                                                                                                                                                                                         | [25]<br><b>(19.51)</b>         |
| <i>atp2b4</i>   | <i>ATP2B4</i>  | PM |                                                                                                                                                                                                                                                                                                                         |                                                                                                                                                    | -                                                                                                                                                                                                                         | [25]<br><b>(50.96)</b>         |
| <i>atp2c1</i>   | <i>ATP2C1</i>  | G  | Ca <sup>2+</sup> transmembrane transport, cellular Ca <sup>2+</sup> homeostasis, manganese ion homeostasis, manganese ion transport                                                                                                                                                                                     | Ca <sup>2+</sup> transporting ATPase activity, manganese-transporting ATPase activity, proton-exporting ATPase activity, phosphorylative mechanism | -                                                                                                                                                                                                                         | [26]<br><b>(34.69)</b>         |
| <i>atp6v0cb</i> | <i>ATP6VOC</i> | PM | ATP hydrolysis coupled proton transport, ion transport                                                                                                                                                                                                                                                                  | proton-transporting ATPase activity, rotational mechanism, voltage-gated Ca <sup>2+</sup> channel activity                                         | disrupted voltage-gated Ca <sup>2+</sup> channel activity [27]                                                                                                                                                            | [17,27,28]<br><b>(148.81)</b>  |

|                        |                       |       |                                                                                                                                                                                                                                                                                                                                                                                       |                                                                                          |                                                                                                                                                                                                |                                                       |                 |
|------------------------|-----------------------|-------|---------------------------------------------------------------------------------------------------------------------------------------------------------------------------------------------------------------------------------------------------------------------------------------------------------------------------------------------------------------------------------------|------------------------------------------------------------------------------------------|------------------------------------------------------------------------------------------------------------------------------------------------------------------------------------------------|-------------------------------------------------------|-----------------|
| <b><u>baxa</u></b>     | <b><u>BAX</u></b>     | PM/Mt | extrinsic apoptotic signaling pathway in absence of ligand, intrinsic apoptotic signaling pathway in response to DNA damage, mitochondrial fusion, positive regulation of apoptotic process, positive regulation of cysteine-type endopeptidase activity involved in apoptotic process, release of cytochrome c from mitochondria, response to cadmium ion, response to methylmercury | channel activity, protein heterodimerization activity, protein homodimerization activity | -                                                                                                                                                                                              | <b>[29]</b>                                           |                 |
|                        |                       |       |                                                                                                                                                                                                                                                                                                                                                                                       |                                                                                          |                                                                                                                                                                                                | <b>LOW (15.69)</b>                                    | <b>LOW</b>      |
| <b><u>baxb</u></b>     | <b><u>BAX</u></b>     | PM/Mt | extrinsic apoptotic signaling pathway in absence of ligand, intrinsic apoptotic signaling pathway in response to DNA damage, mitochondrial fusion, positive regulation of apoptotic process, positive regulation of cysteine-type endopeptidase activity involved in apoptotic process, release of cytochrome c from mitochondria                                                     | channel activity, protein heterodimerization activity, protein homodimerization activity | -                                                                                                                                                                                              | <b>[30]</b><br><b>(1.60)</b>                          |                 |
| <b><u>cab39</u></b>    | <b><u>CAB39</u></b>   | C     | signal transduction by protein phosphorylation                                                                                                                                                                                                                                                                                                                                        | protein kinase activator activity                                                        | -                                                                                                                                                                                              | <b>(22.53)</b>                                        |                 |
| <b><u>cab39l</u></b>   | <b><u>CAB39L</u></b>  | C     | signal transduction by protein phosphorylation                                                                                                                                                                                                                                                                                                                                        | contributes_to protein serine/threonine kinase activity                                  | -                                                                                                                                                                                              | <b>(72.69)</b>                                        |                 |
| <b><u>cabp1a</u></b>   | <b><u>CABP1</u></b>   | PM    | -                                                                                                                                                                                                                                                                                                                                                                                     | Ca <sup>2+</sup> binding                                                                 | -                                                                                                                                                                                              | <b>[7]</b><br><b>(23.54)</b>                          |                 |
| <b><u>cabp1b</u></b>   | <b><u>CABP1</u></b>   | PM    | -                                                                                                                                                                                                                                                                                                                                                                                     |                                                                                          | -                                                                                                                                                                                              | <b>[7,31]</b><br><b>(11.27)</b>                       |                 |
| <b><u>cacna1aa</u></b> | <b><u>CACNA1A</u></b> | PM    | Ca <sup>2+</sup> transmembrane transport, chemical synaptic transmission, regulation of ion transmembrane transport                                                                                                                                                                                                                                                                   | voltage-gated Ca <sup>2+</sup> channel activity                                          | -                                                                                                                                                                                              | <b>[6]</b><br><b>LOW (300.33)</b> <b>VERY LOW</b>     |                 |
| <b><u>cacna1ab</u></b> | <b><u>CACNA1A</u></b> | PM    | Ca <sup>2+</sup> transmembrane transport, chemical synaptic transmission, neuromuscular synaptic transmission, regulation of ion transmembrane transport, swimming behavior, thigmotaxis                                                                                                                                                                                              | high voltage-gated Ca <sup>2+</sup> channel activity, Ca <sup>2+</sup> binding           | abnormal high voltage-gated Ca <sup>2+</sup> channel activity, decreased neuromuscular synaptic transmission, abnormal swimming behavior, disrupted thigmotaxis, decreased mobility [14,32,33] | <b>[32]</b><br><b>MEDIUM (175.40)</b> <b>VERY LOW</b> |                 |
| <b><u>cacna1ba</u></b> | <b><u>CACNA1B</u></b> | PM    | Ca <sup>2+</sup> transmembrane transport, chemical synaptic transmission, regulation of ion transmembrane transport                                                                                                                                                                                                                                                                   | voltage-gated Ca <sup>2+</sup> channel activity                                          | -                                                                                                                                                                                              | <b>[34]</b><br><b>(84.54)</b>                         |                 |
| <b><u>cacna1bb</u></b> | <b><u>CACNA1B</u></b> | PM    | transmembrane transport                                                                                                                                                                                                                                                                                                                                                               |                                                                                          | -                                                                                                                                                                                              | <b>VERY LOW</b>                                       | <b>VERY LOW</b> |



|                 |                |    |                                                                                                                                                                                                                                                                        |                                                      |                                                                                                                                                                                                                                                                                                                                         |                            |                 |
|-----------------|----------------|----|------------------------------------------------------------------------------------------------------------------------------------------------------------------------------------------------------------------------------------------------------------------------|------------------------------------------------------|-----------------------------------------------------------------------------------------------------------------------------------------------------------------------------------------------------------------------------------------------------------------------------------------------------------------------------------------|----------------------------|-----------------|
| <i>cacna1c</i>  | <i>CACNA1C</i> | PM | Ca <sup>2+</sup> transmembrane transport, embryonic cranial skeleton morphogenesis, heart looping, heart morphogenesis, kidney development, physiological cardiac muscle hypertrophy, regulation of heart contraction                                                  | high voltage-gated Ca <sup>2+</sup> channel activity | decreased volume of cardiac muscle cells, abnormal cardiac ventricle morphology, arrested heart concontrations, pronephric duct cystic and dilated, hydrocephalic brain, disrupted determination of heart left/right asymmetry, abnormal mandibular arch skeleton morphology, decreased size of Meckel's cartilage chondrocytes [35-38] | [35,39]<br><b>(220.38)</b> |                 |
| <i>cacna1da</i> | <i>CACNA1D</i> | PM | Ca <sup>2+</sup> transmembrane transport, detection of mechanical stimulus involved in sensory perception of sound, neuromuscular process controlling balance, synapse organization                                                                                    |                                                      | abnormal neuromast hair cell cellular response to mechanical stimulus, neuromast hair cell ribbon synapse morphology and organization, abnormal neuron-neuron synaptic transmission, disrupted posterior lateral line neuromast hair cell development, abnormal larval locomotory behavior [14,40,41]                                   | [42-44]<br><b>(93.97)</b>  |                 |
| <i>cacna1db</i> | <i>CACNA1D</i> | PM | Ca <sup>2+</sup> transmembrane transport, regulation of ion transmembrane transport                                                                                                                                                                                    | high voltage-gated Ca <sup>2+</sup> channel activity | -                                                                                                                                                                                                                                                                                                                                       | <b>VERY LOW (30.97)</b>    | <b>VERY LOW</b> |
| <i>cacna1eb</i> | <i>CACNA1E</i> | PM | Ca <sup>2+</sup> transmembrane transport, chemical synaptic transmission                                                                                                                                                                                               | voltage-gated Ca <sup>2+</sup> channel activity      | -                                                                                                                                                                                                                                                                                                                                       | <b>(71.33)</b>             |                 |
| <i>cacna1fa</i> | <i>CACNA1F</i> | PM | T cell homeostasis, Ca <sup>2+</sup> transmembrane transport, regulation of T cell receptor signaling pathway, synapse organization, visual perception                                                                                                                 | high voltage-gated Ca <sup>2+</sup> channel activity | retinal outer plexiform layer decreased thickness, abnormal detection of light stimulus involved in visual perception, abnormal retinal cone cell chemical synaptic transmission, abnormal retinal cone cell cone cell pedicle morphology [45]                                                                                          | [45]<br><b>(0.8)</b>       |                 |
| <i>cacna1g</i>  | <i>CACNA1G</i> | PM | Ca <sup>2+</sup> transmembrane transport, cardiac muscle cell action potential involved in contraction, membrane depolarization during action potential, positive regulation of Ca <sup>2+</sup> -dependent exocytosis, regulation of heart rate by cardiac conduction | low voltage-gated Ca <sup>2+</sup> channel activity  | -                                                                                                                                                                                                                                                                                                                                       | <b>LOW (137.38)</b>        | <b>VERY LOW</b> |
| <i>cacna1ha</i> | <i>CACNA1H</i> | PM | Ca <sup>2+</sup> transmembrane transport, membrane depolarization during action potential, neuronal action potential, positive regulation of Ca <sup>2+</sup> -dependent exocytosis                                                                                    | low voltage-gated Ca <sup>2+</sup> channel activity  | -                                                                                                                                                                                                                                                                                                                                       | [1,46]<br><b>(74.71)</b>   |                 |
| <i>cacna1hb</i> | <i>CACNA1H</i> | PM |                                                                                                                                                                                                                                                                        |                                                      | -                                                                                                                                                                                                                                                                                                                                       | <b>(6.91)</b>              |                 |
| <i>cacna1i</i>  | <i>CACNA1I</i> | PM | Ca <sup>2+</sup> transmembrane transport, flagellated sperm motility, membrane depolarization during action potential, neuronal action potential positive regulation of Ca <sup>2+</sup> -dependent exocytosis                                                         |                                                      | -                                                                                                                                                                                                                                                                                                                                       | [42]<br><b>(8.47)</b>      |                 |

|                         |                        |    |                                                                                                                                                                                                                                         |                                                                             |                                                                                                                                                                                                                                                            |                     |          |
|-------------------------|------------------------|----|-----------------------------------------------------------------------------------------------------------------------------------------------------------------------------------------------------------------------------------------|-----------------------------------------------------------------------------|------------------------------------------------------------------------------------------------------------------------------------------------------------------------------------------------------------------------------------------------------------|---------------------|----------|
| <i>cacna1sa</i>         | <i>CACNA1S</i>         | PM | Ca <sup>2+</sup> transmembrane transport                                                                                                                                                                                                | high voltage-gated Ca <sup>2+</sup> channel activity                        | -                                                                                                                                                                                                                                                          | [42]<br>(0.6)       |          |
| <i>cacna1sb</i>         | <i>CACNA1S</i>         | PM |                                                                                                                                                                                                                                         | high voltage-gated Ca <sup>2+</sup> channel activity, protein binding       | -                                                                                                                                                                                                                                                          | (0.52)              |          |
| <b><i>cacna2d1a</i></b> | <b><i>CACNA2D1</i></b> | PM | -                                                                                                                                                                                                                                       | voltage-gated Ca <sup>2+</sup> channel activity                             | -                                                                                                                                                                                                                                                          | VERY LOW<br>(20.71) | VERY LOW |
| <i>cacna2d2a</i>        | <i>CACNA2D2</i>        | PM | -                                                                                                                                                                                                                                       |                                                                             | -                                                                                                                                                                                                                                                          | (19.95)             |          |
| <i>cacna2d2b</i>        | <i>CACNA2D2</i>        | PM | -                                                                                                                                                                                                                                       |                                                                             | -                                                                                                                                                                                                                                                          | (102.25)            |          |
| <b><i>cacna2d3</i></b>  | <b><i>CACNA2D3</i></b> | PM | -                                                                                                                                                                                                                                       |                                                                             | -                                                                                                                                                                                                                                                          | VERY LOW<br>(10.11) | VERY LOW |
| <i>cacna2d3a</i>        | <i>CACNA2D3</i>        | PM | -                                                                                                                                                                                                                                       | -                                                                           | -                                                                                                                                                                                                                                                          | (10.09)             |          |
| <i>cacna2d4a</i>        | <i>CACNA2D4</i>        | PM | -                                                                                                                                                                                                                                       | voltage-gated Ca <sup>2+</sup> channel activity                             | -                                                                                                                                                                                                                                                          | (133.13)            |          |
| <b><i>cacna2d4b</i></b> | <b><i>CACNA2D4</i></b> | PM | -                                                                                                                                                                                                                                       |                                                                             | -                                                                                                                                                                                                                                                          | VERY LOW<br>(15.91) | VERY LOW |
| <i>cacnb2a</i>          | <i>CACNB2</i>          | PM | Ca <sup>2+</sup> transmembrane transport, chemical synaptic transmission, embryonic heart tube morphogenesis, neuromuscular junction development, regulation of voltage-gated Ca <sup>2+</sup> channel activity                         | high voltage-gated Ca <sup>2+</sup> channel activity                        | abnormal cardiac ventricle sarcomere organization, disrupted cell-cell adhesion mediated by cadherin, malformed heart, decreased contractility of the heart, abnormal blood circulation, decreased cell proliferation involved in heart morphogenesis [47] | [48,49]<br>(51.20)  |          |
| <i>cacnb2b</i>          | <i>CACNB2</i>          | PM | Ca <sup>2+</sup> transmembrane transport, chemical synaptic transmission, neuromuscular junction development, regulation of voltage-gated Ca <sup>2+</sup> channel activity                                                             |                                                                             | -                                                                                                                                                                                                                                                          | [48,49]<br>(40.02)  |          |
| <i>cacnb3a</i>          | <i>CACNB3</i>          | PM |                                                                                                                                                                                                                                         |                                                                             | -                                                                                                                                                                                                                                                          | [48,49]<br>(0.56)   |          |
| <i>cacnb3b</i>          | <i>CACNB3</i>          | PM |                                                                                                                                                                                                                                         |                                                                             | -                                                                                                                                                                                                                                                          | (4.18)              |          |
| <i>cacnb4a</i>          | <i>CACNB4</i>          | PM |                                                                                                                                                                                                                                         |                                                                             | initiation of epiboly arrested, abnormal division and dispersal of yolk syncytial nuclei, blastoderm retraction, and death [48]                                                                                                                            | [48,49]<br>(15.19)  |          |
| <i>cacnb4b</i>          | <i>CACNB4</i>          | PM | Ca <sup>2+</sup> transmembrane transport, chemical synaptic transmission, epiboly involved in gastrulation with mouth forming second, neuromuscular junction development, regulation of voltage-gated Ca <sup>2+</sup> channel activity |                                                                             |                                                                                                                                                                                                                                                            | [48,49]<br>(35.52)  |          |
| <i>cacng1a</i>          | <i>CACNG1</i>          | PM | Ca <sup>2+</sup> transmembrane transport                                                                                                                                                                                                | channel regulator activity, voltage-gated Ca <sup>2+</sup> channel activity | -                                                                                                                                                                                                                                                          | (0.3)               |          |
| <i>cacng1b</i>          | <i>CACNG1</i>          | PM |                                                                                                                                                                                                                                         |                                                                             | -                                                                                                                                                                                                                                                          | (5.07)              |          |
| <b><i>cacng2a</i></b>   | <b><i>CACNG2</i></b>   | PM | AMPA selective glutamate receptor signaling pathway, Ca <sup>2+</sup> transmembrane transport, neurotransmitter receptor internalization, neurotransmitter receptor transport,                                                          |                                                                             | edematous heart, abnormal startle response and thigmotaxis, decreased signaling via AMPA receptor in Mauthner neuron [50]                                                                                                                                  | [7,50]              |          |
|                         |                        |    |                                                                                                                                                                                                                                         |                                                                             |                                                                                                                                                                                                                                                            | LOW (86.02)         | VERY LOW |
| <b><i>cacng3b</i></b>   | <b><i>CACNG3</i></b>   | PM |                                                                                                                                                                                                                                         |                                                                             |                                                                                                                                                                                                                                                            | LOW (57.02)         | VERY LOW |

|                |                |           |                                                                                                                                                                                                         |                                                                                        |                                                               |                        |          |
|----------------|----------------|-----------|---------------------------------------------------------------------------------------------------------------------------------------------------------------------------------------------------------|----------------------------------------------------------------------------------------|---------------------------------------------------------------|------------------------|----------|
| <i>cacng4a</i> | <i>CACNG1</i>  | PM        | postsynaptic endosome to lysosome,                                                                                                                                                                      |                                                                                        | -                                                             | (2.66)                 |          |
| <i>cacng4b</i> | <i>CACNG4</i>  | PM        | postsynaptic neurotransmitter receptor diffusion                                                                                                                                                        |                                                                                        | -                                                             | (15.89)                |          |
| <i>cacng5a</i> | <i>CACNG1</i>  | PM        | trapping, regulation of AMPA receptor activity,                                                                                                                                                         |                                                                                        | -                                                             | (4.87)                 |          |
| <i>cacng5b</i> | <i>CACNG5b</i> | PM        | regulation of ion transmembrane transport,                                                                                                                                                              |                                                                                        | -                                                             | (7.56)                 |          |
| <i>cacng6a</i> | <i>CACNG1</i>  | PM        | transmission of nerve impulse                                                                                                                                                                           |                                                                                        | -                                                             | (0.1)                  |          |
| <i>cacng6b</i> | <i>CACNG1</i>  | PM        | -                                                                                                                                                                                                       | -                                                                                      | -                                                             | (0.78)                 |          |
| <i>cacng7a</i> | <i>CACNG7</i>  | PM        | Ca <sup>2+</sup> transmembrane transport                                                                                                                                                                |                                                                                        | -                                                             |                        |          |
| <i>cacng7b</i> | <i>CACNG7</i>  | PM        | AMPA selective glutamate receptor signaling pathway, Ca <sup>2+</sup> transmembrane transport,                                                                                                          | voltage-gated Ca <sup>2+</sup> channel activity                                        | -                                                             | LOW (45.71)            | VERY LOW |
| <i>cacng8a</i> | <i>CACNG8</i>  | PM        | neurotransmitter receptor internalization,                                                                                                                                                              |                                                                                        |                                                               | LOW (36.46)            | VERY LOW |
| <i>cacng8b</i> | <i>CACNG8</i>  | PM        | neurotransmitter receptor transport,                                                                                                                                                                    |                                                                                        |                                                               | LOW (76.87)            | VERY LOW |
| <i>cacng8b</i> | <i>CACNG8</i>  | PM        | postsynaptic endosome to lysosome,                                                                                                                                                                      |                                                                                        |                                                               | VERY LOW (88.64)       | VERY LOW |
| <i>cacng8b</i> | <i>CACNG8</i>  | PM        | trapping, regulation of AMPA receptor activity,                                                                                                                                                         |                                                                                        |                                                               |                        |          |
| <i>cacng8b</i> | <i>CACNG8</i>  | PM        | regulation of ion transmembrane transport,                                                                                                                                                              |                                                                                        |                                                               |                        |          |
| <i>cacng8b</i> | <i>CACNG8</i>  | PM        | transmission of nerve impulse                                                                                                                                                                           |                                                                                        |                                                               |                        |          |
| <i>cadps2</i>  | <i>CADPS2</i>  | N         | dense core granule exocytosis, synaptic vesicle exocytosis                                                                                                                                              | -                                                                                      | -                                                             | [6,7,51,52]<br>(38.19) |          |
| <i>cadpsa</i>  | <i>CADPS</i>   | C         |                                                                                                                                                                                                         | -                                                                                      | -                                                             | [6]<br>(53.08)         |          |
| <i>cadpsb</i>  | <i>CADPS</i>   | C         |                                                                                                                                                                                                         | -                                                                                      | -                                                             | (340.0)                |          |
| <i>calb1</i>   | <i>CALB1</i>   | C         | Ca <sup>2+</sup> homeostasis, regulation of cytosolic Ca <sup>2+</sup> concentration, regulation of long-term synaptic potentiation, regulation of presynaptic cytosolic Ca <sup>2+</sup> concentration |                                                                                        | -                                                             | (20.68)                |          |
| <i>calb2a</i>  | <i>CALB2</i>   | C         |                                                                                                                                                                                                         |                                                                                        | -                                                             | [7,17,53]<br>(8.3)     |          |
| <i>calb2b</i>  | <i>CALB2</i>   | C         |                                                                                                                                                                                                         |                                                                                        | -                                                             | [53-57]<br>(24.22)     |          |
| <i>calhm1</i>  | <i>CALHM1</i>  | PM        | cation transport                                                                                                                                                                                        | Ca <sup>2+</sup> activated cation channel activity, voltage-gated ion channel activity | -                                                             | (0.19)                 |          |
| <i>calhm2</i>  | <i>CALHM2</i>  | PM        | -                                                                                                                                                                                                       | -                                                                                      | -                                                             | (0.25)                 |          |
| <i>calhm3</i>  | <i>CALHM3</i>  | PM        | -                                                                                                                                                                                                       | -                                                                                      | -                                                             | (0.08)                 |          |
| <i>calm1a</i>  | <i>CALM1</i>   | PM/C/N/ER | midbrain-hindbrain boundary morphogenesis                                                                                                                                                               | -                                                                                      | abnormal morphology of midbrain hindbrain boundary cells [58] | [1,46,58]<br>(171.83)  |          |
| <i>calml4a</i> | <i>CALML4</i>  | N/C       | Ca <sup>2+</sup> -mediated signaling                                                                                                                                                                    | Ca <sup>2+</sup> binding                                                               | -                                                             | (0.51)                 |          |
| <i>calml4b</i> | <i>CALML4</i>  | N/C       |                                                                                                                                                                                                         |                                                                                        | -                                                             | (36.32)                |          |

|               |               |      |                                                                    |                                                                                                                |                                                                                                                                                                                                                                                                                         |                   |
|---------------|---------------|------|--------------------------------------------------------------------|----------------------------------------------------------------------------------------------------------------|-----------------------------------------------------------------------------------------------------------------------------------------------------------------------------------------------------------------------------------------------------------------------------------------|-------------------|
| <i>calr</i>   | <i>CALR</i>   | ER   | protein folding                                                    | Ca <sup>2+</sup> binding, unfolded protein binding                                                             | -                                                                                                                                                                                                                                                                                       | [7]<br>(62.72)    |
| <i>calr3a</i> | <i>CALR3</i>  | ER   |                                                                    |                                                                                                                | decreased amount of neuroblasts [59]                                                                                                                                                                                                                                                    | [7]<br>(46.31)    |
| <i>calr3b</i> | <i>CALR3</i>  | ER   |                                                                    |                                                                                                                | -                                                                                                                                                                                                                                                                                       | [1,60]<br>(21.19) |
| <i>calua</i>  | <i>CALU</i>   | ER/G | -                                                                  | Ca <sup>2+</sup> binding                                                                                       | -                                                                                                                                                                                                                                                                                       | [7]<br>(20.44)    |
| <i>calub</i>  | <i>CALU</i>   | ER/G | -                                                                  |                                                                                                                | -                                                                                                                                                                                                                                                                                       | [7]<br>(6.63)     |
| <i>canx</i>   | <i>CANX</i>   | ER   | posterior lateral line development, protein folding                | Ca <sup>2+</sup> binding, unfolded protein binding                                                             | decreased amount of neuromasts, abnormal development of posterior lateral line primordium [59]                                                                                                                                                                                          | [59]<br>(141.41)  |
| <i>capn10</i> | <i>CAPN10</i> | C    | cellular response to insulin stimulus, proteolysis                 | Ca <sup>2+</sup> -dependent cysteine-type endopeptidase activity, hydrolase activity                           | -                                                                                                                                                                                                                                                                                       | (21.91)           |
| <i>capn12</i> | <i>CAPN12</i> | C    | keratinocyte differentiation, proteolysis                          | Ca <sup>2+</sup> binding, Ca <sup>2+</sup> -dependent cysteine-type endopeptidase activity, hydrolase activity | increased size of keratinocytes, disrupted keratinocyte differentiation, edematous pericardium, increased mortality [61]                                                                                                                                                                | (0.72)            |
| <i>capn15</i> | <i>CAPN15</i> | C    | proteolysis                                                        |                                                                                                                | -                                                                                                                                                                                                                                                                                       | (47.36)           |
| <i>capn1a</i> | <i>CAPN1</i>  | C    | brain development, branchiomotor neuron axon guidance, proteolysis |                                                                                                                | disorganized branchiomotor neuron, disrupted axon guidance of branchiomotor neuron, disrupted neuron migration, disrupted brain development, disorganized brain microtubule cytoskeleton, hydrocephalic brain, decreased size of eye, edematous pericardium, aplastic swim bladder [62] | [63]<br>(34.26)   |
| <i>capn1b</i> | <i>CAPN1</i>  | C    | negative regulation of apoptotic process, proteolysis              |                                                                                                                | -                                                                                                                                                                                                                                                                                       | [63]<br>(0.45)    |
| <i>capn2a</i> | <i>CAPN2</i>  | C    | proteolysis, regulation of cytoskeleton organization               |                                                                                                                | -                                                                                                                                                                                                                                                                                       | [63]<br>(2.64)    |
| <i>capn2b</i> | <i>CAPN2</i>  | C    |                                                                    |                                                                                                                | -                                                                                                                                                                                                                                                                                       | [7,63]<br>(1.73)  |
| <i>capn3a</i> | <i>CAPN3</i>  | C    | proteolysis, sarcomere organization                                |                                                                                                                | -                                                                                                                                                                                                                                                                                       | [7,64]<br>(0.63)  |
| <i>capn5a</i> | <i>CAPN5</i>  | C    | proteolysis                                                        |                                                                                                                | -                                                                                                                                                                                                                                                                                       | (2.57)            |
| <i>capn5b</i> | <i>CAPN5</i>  | C    |                                                                    |                                                                                                                | -                                                                                                                                                                                                                                                                                       | (3.49)            |
| <i>capn7</i>  | <i>CAPN7</i>  | C    |                                                                    |                                                                                                                | -                                                                                                                                                                                                                                                                                       | (14.8)            |

|               |               |      |                                                                                                                                                                                                                                                                                                                    |                                                                                                                |                                                                                                                                                                                                                                                                                                                                                                      |                      |          |
|---------------|---------------|------|--------------------------------------------------------------------------------------------------------------------------------------------------------------------------------------------------------------------------------------------------------------------------------------------------------------------|----------------------------------------------------------------------------------------------------------------|----------------------------------------------------------------------------------------------------------------------------------------------------------------------------------------------------------------------------------------------------------------------------------------------------------------------------------------------------------------------|----------------------|----------|
| <i>capn9</i>  | <i>CAPN9</i>  | C    | digestion, proteolysis                                                                                                                                                                                                                                                                                             | Ca <sup>2+</sup> binding, Ca <sup>2+</sup> -dependent cysteine-type endopeptidase activity, hydrolase activity | -                                                                                                                                                                                                                                                                                                                                                                    | [1,7]<br>(0.23)      |          |
| <i>casr</i>   | <i>CASR</i>   | PM   | G protein-coupled receptor signaling pathway, Ca <sup>2+</sup> homeostasis, signal transduction, skeletal system development                                                                                                                                                                                       | G protein-coupled receptor activity                                                                            | abnormal auditory behavior, increased area of Mauthner neuron cell body, <i>stc1l</i> expression decreased, disrupted Ca <sup>2+</sup> homeostasis, disrupted myotome development and morphology, disrupted notochord development and morphology, cranial vault dorso-ventrally flattened [65-68]                                                                    | [65,66,69]<br>(0.15) |          |
| <i>cbarpb</i> | <i>CBARP</i>  | PM   | negative regulation of voltage-gated Ca <sup>2+</sup> channel activity                                                                                                                                                                                                                                             | ion channel binding                                                                                            | -                                                                                                                                                                                                                                                                                                                                                                    | [6]<br>(50.03)       |          |
| <i>ccar1</i>  | <i>CCAR1</i>  | N    | regulation of transcription, DNA-templated                                                                                                                                                                                                                                                                         | nuclear receptor transcription coactivator activity                                                            | -                                                                                                                                                                                                                                                                                                                                                                    | (6.73)               |          |
| <i>ccar2</i>  | <i>CCAR2</i>  | N/Mt | positive regulation of apoptotic process, regulation of transcription, DNA-templated, RNA splicing                                                                                                                                                                                                                 | -                                                                                                              | -                                                                                                                                                                                                                                                                                                                                                                    | (19.58)              |          |
| <i>ccbe1</i>  | <i>CCBE1</i>  | EM   | angiogenesis, blood vessel morphogenesis, lymph vessel development, lymphangiogenesis, multicellular organism development, sprouting angiogenesis, vascular endothelial growth factor signaling pathway, venous blood vessel morphogenesis, venous endothelial cell migration involved in lymph vessel development | Ca <sup>2+</sup> binding                                                                                       | -                                                                                                                                                                                                                                                                                                                                                                    | [70]<br>(1.84)       |          |
| <i>cetn2</i>  | <i>CETN2</i>  | N    | centriole replication, microtubule cytoskeleton organization, nucleotide-excision repair                                                                                                                                                                                                                           |                                                                                                                | -                                                                                                                                                                                                                                                                                                                                                                    | [71]<br>(25.83)      |          |
| <i>cetn3</i>  | <i>CETN3</i>  | N    | -                                                                                                                                                                                                                                                                                                                  |                                                                                                                | -                                                                                                                                                                                                                                                                                                                                                                    | (17.22)              |          |
| <i>cetn4</i>  | <i>CETN4</i>  | N    | cilium assembly, interkinetic nuclear migration, microtubule cytoskeleton organization                                                                                                                                                                                                                             |                                                                                                                | hydrocephalic brain, decreased size of eyes, edematous pericardium, post-vent region increased curvature, cystic pronephrons, disrupted cilium assembly, disorganized pronephric duct, regulation of cell cycle disrupted, interkinetic nuclear migration disrupted, presumptive neural retina decreased thickness and microtubule cytoskeleton disorganized [72,73] | [1,74,75]<br>(7.98)  |          |
| <i>cgref1</i> | <i>CGREF1</i> | EM   | cell adhesion, cell cycle arrest, negative regulation of cell proliferation                                                                                                                                                                                                                                        |                                                                                                                | -                                                                                                                                                                                                                                                                                                                                                                    | MEDIUM<br>(13.95)    | MEDIUM   |
| <i>cherp</i>  | <i>CHERP</i>  | ER/C | RNA processing, cellular Ca <sup>2+</sup> homeostasis                                                                                                                                                                                                                                                              | RNA binding                                                                                                    | -                                                                                                                                                                                                                                                                                                                                                                    | VERY LOW<br>(41.45)  | VERY LOW |

|                        |                       |               |                                                                                                                                                                                                                                                                                                                                                                            |                                                                                         |                                                                                                                                                                                                                                                                       |                                     |                 |
|------------------------|-----------------------|---------------|----------------------------------------------------------------------------------------------------------------------------------------------------------------------------------------------------------------------------------------------------------------------------------------------------------------------------------------------------------------------------|-----------------------------------------------------------------------------------------|-----------------------------------------------------------------------------------------------------------------------------------------------------------------------------------------------------------------------------------------------------------------------|-------------------------------------|-----------------|
| <b><i>chp1</i></b>     | <b><i>CHP1</i></b>    | PM/ER/<br>N/C | -                                                                                                                                                                                                                                                                                                                                                                          | Ca <sup>2+</sup> binding                                                                | disrupted axonogenesis, hypoplastic cerebellum,<br>decreased size of the optic tectum [76]                                                                                                                                                                            | <b>[7]</b>                          |                 |
|                        |                       |               |                                                                                                                                                                                                                                                                                                                                                                            |                                                                                         |                                                                                                                                                                                                                                                                       | <b>MEDIUM<br/>(11.68)</b>           | <b>LOW</b>      |
| <b><i>chp2</i></b>     | <b><i>CHP2</i></b>    | PM/N          | -                                                                                                                                                                                                                                                                                                                                                                          |                                                                                         | -                                                                                                                                                                                                                                                                     | <b>LOW (2.73)</b>                   | <b>LOW</b>      |
| <b><i>cisd2</i></b>    | <b><i>CISD2</i></b>   | ER/Mt         | autophagy, autophagy of mitochondrion,<br>multicellular organism aging                                                                                                                                                                                                                                                                                                     | iron-sulfur cluster binding,<br>metal ion binding, protein<br>homodimerization activity | -                                                                                                                                                                                                                                                                     | <b>LOW (8.46)</b>                   | <b>LOW</b>      |
| <b><i>clgn</i></b>     | <b><i>CLGN</i></b>    | ER            | protein folding                                                                                                                                                                                                                                                                                                                                                            | Ca <sup>2+</sup> binding, unfolded protein<br>binding                                   | -                                                                                                                                                                                                                                                                     | <b>[7]</b><br><b>(97.69)</b>        |                 |
| <b><i>clstn1</i></b>   | <b><i>CLSTN1</i></b>  | PM            | axon arborization, axonal transport,<br>establishment or maintenance of microtubule<br>cytoskeleton polarity, homophilic cell adhesion<br>via plasma membrane adhesion molecules,<br>positive regulation of synapse assembly, positive<br>regulation of synaptic transmission, regulation of<br>collateral sprouting, retrograde transport,<br>endosome to plasma membrane | Ca <sup>2+</sup> binding                                                                | decreased branchiness of Rohon-Beard neuron<br>axon and trigeminal ganglion axon, decreased<br>anterograde axonal transport in<br>Rohon-Beard neuron, mislocalised Rohon-Beard<br>neuron early endosome, decreased retrograde<br>transport in Rohon-Beard neuron [77] | <b>[7,77-79]</b><br><b>(535.32)</b> |                 |
| <b><i>clstn2</i></b>   | <b><i>CLSTN2</i></b>  | PM            | homophilic cell adhesion via plasma membrane<br>adhesion molecules, positive regulation of<br>synapse assembly, positive regulation of synaptic<br>transmission                                                                                                                                                                                                            |                                                                                         | -                                                                                                                                                                                                                                                                     | <b>[78]</b><br><b>(9.63)</b>        |                 |
| <b><i>cracr2aa</i></b> | <b><i>CRACR2A</i></b> | PM            | -                                                                                                                                                                                                                                                                                                                                                                          | -                                                                                       | -                                                                                                                                                                                                                                                                     | <b>(4.2)</b>                        |                 |
| <b><i>cracr2ab</i></b> | <b><i>CRACR2A</i></b> | PM            | -                                                                                                                                                                                                                                                                                                                                                                          | GTPase activity, Ca <sup>2+</sup> binding                                               | -                                                                                                                                                                                                                                                                     | <b>VERY LOW<br/>(1.61)</b>          | <b>VERY LOW</b> |
| <b><i>cracr2b</i></b>  | <b><i>CRACR2B</i></b> | PM            | -                                                                                                                                                                                                                                                                                                                                                                          | Ca <sup>2+</sup> binding                                                                | -                                                                                                                                                                                                                                                                     | <b>(0.21)</b>                       |                 |
| <b><i>creb1a</i></b>   | <b><i>CREB1</i></b>   | N             | convergent extension involved in axis elongation,<br>midbrain-hindbrain boundary development,<br>regulation of transcription, DNA-templated,<br>somitogenesis                                                                                                                                                                                                              | DNA-binding transcription<br>factor activity                                            | -                                                                                                                                                                                                                                                                     | <b>[80]</b><br><b>(22.59)</b>       |                 |
| <b><i>creb1b</i></b>   | <b><i>CREB1</i></b>   | N             | regulation of transcription, DNA-templated                                                                                                                                                                                                                                                                                                                                 | DNA-binding transcription<br>factor activity                                            | -                                                                                                                                                                                                                                                                     | <b>(35.10)</b>                      |                 |
| <b><i>creb5a</i></b>   | <b><i>CREB5</i></b>   | N             |                                                                                                                                                                                                                                                                                                                                                                            | DNA-binding transcription<br>factor activity                                            | -                                                                                                                                                                                                                                                                     | <b>(7.03)</b>                       |                 |
| <b><i>creb5b</i></b>   | <b><i>CREB5</i></b>   | N             |                                                                                                                                                                                                                                                                                                                                                                            | DNA-binding transcription<br>factor activity, metal ion<br>binding                      | -                                                                                                                                                                                                                                                                     | <b>(2.25)</b>                       |                 |
| <b><i>crebl2</i></b>   | <b><i>CREBL2</i></b>  | N             | cell differentiation, positive regulation of fat cell<br>differentiation, positive regulation of glucose<br>import, positive regulation of lipid biosynthetic<br>process, positive regulation of transcription,<br>DNA-templated                                                                                                                                           | DNA-binding transcription<br>factor activity                                            | -                                                                                                                                                                                                                                                                     | <b>(95.06)</b>                      |                 |

|                 |                |      |                                                                                                                                                                                                                                                                                                                                          |                                                                                                             |                                                                                                                                                                                                                                                                                                                                                                                                                                      |                 |          |
|-----------------|----------------|------|------------------------------------------------------------------------------------------------------------------------------------------------------------------------------------------------------------------------------------------------------------------------------------------------------------------------------------------|-------------------------------------------------------------------------------------------------------------|--------------------------------------------------------------------------------------------------------------------------------------------------------------------------------------------------------------------------------------------------------------------------------------------------------------------------------------------------------------------------------------------------------------------------------------|-----------------|----------|
| <i>creb3l1</i>  | <i>CREB3L1</i> | N    | endoplasmic reticulum unfolded protein response, positive regulation of transcription by RNA polymerase II, regulation of transcription, DNA-templated                                                                                                                                                                                   | DNA-binding transcription factor activity, cAMP response element binding                                    | -                                                                                                                                                                                                                                                                                                                                                                                                                                    | (5.3)           |          |
| <i>creb3l2</i>  | <i>CREB3L2</i> | ER   | chondrocyte differentiation, endoplasmic reticulum unfolded protein response, multicellular organism development, positive regulation of transcription by RNA polymerase II, regulation of ER to Golgi vesicle-mediated transport, regulation of extracellular matrix constituent secretion, regulation of transcription, DNA-templated, |                                                                                                             | Ceratothyal, Meckel's and palatoquadrate cartilages malformed, abnormal chondroblast spatial pattern, head and trunk decreased length, chondrocyte endoplasmic reticulum distended, decreased collagen biosynthesis, abnormal collagen fibril organization, decreased endoplasmic reticulum to Golgi vesicle-mediated transport and extracellular matrix constituent secretion, melanocyte melanosome immature and disorganized [81] | (9.7)           | [81]     |
| <i>creb3l3a</i> | <i>CREB3L3</i> | ER/N | endoplasmic reticulum unfolded protein response, positive regulation of transcription by RNA polymerase II, regulation of transcription, DNA-templated                                                                                                                                                                                   |                                                                                                             | -                                                                                                                                                                                                                                                                                                                                                                                                                                    | (0.22)          | [7]      |
| <i>creb3l3b</i> | <i>CREB3L3</i> | ER/N | endoplasmic reticulum unfolded protein response, positive regulation of transcription by RNA polymerase II, regulation of transcription, DNA-templated                                                                                                                                                                                   |                                                                                                             | -                                                                                                                                                                                                                                                                                                                                                                                                                                    | (2.03)          |          |
| <i>creb3l4</i>  | <i>CREB3L4</i> | N    | -                                                                                                                                                                                                                                                                                                                                        |                                                                                                             | -                                                                                                                                                                                                                                                                                                                                                                                                                                    | (25.86)         |          |
| <i>crebbpa</i>  | <i>CREBBP</i>  | N    | hematopoietic progenitor cell differentiation, histone acetylation, regulation of transcription, DNA-templated                                                                                                                                                                                                                           | histone acetyltransferase activity, metal ion binding, transcription coactivator activity, zinc ion binding | -                                                                                                                                                                                                                                                                                                                                                                                                                                    | [82,83]         |          |
|                 |                |      |                                                                                                                                                                                                                                                                                                                                          |                                                                                                             | -                                                                                                                                                                                                                                                                                                                                                                                                                                    | LOW (18.01)     | VERY LOW |
| <i>crebbpb</i>  | <i>CREBBP</i>  | N    | histone acetylation, regulation of transcription, DNA-templated                                                                                                                                                                                                                                                                          |                                                                                                             | -                                                                                                                                                                                                                                                                                                                                                                                                                                    | [82,83]         |          |
|                 |                |      |                                                                                                                                                                                                                                                                                                                                          |                                                                                                             |                                                                                                                                                                                                                                                                                                                                                                                                                                      | (7.65)          |          |
| <i>crebrf</i>   | <i>CREBRF</i>  | N    | regulation of transcription, DNA-templated, response to unfolded protein                                                                                                                                                                                                                                                                 | DNA-binding transcription factor activity                                                                   | -                                                                                                                                                                                                                                                                                                                                                                                                                                    | (19.56)         |          |
| <i>crebzf</i>   | <i>CREBZF</i>  | N    | regulation of DNA-binding transcription factor activity                                                                                                                                                                                                                                                                                  |                                                                                                             | -                                                                                                                                                                                                                                                                                                                                                                                                                                    | (61.58)         |          |
| <i>crtc1a</i>   | <i>CRTC1</i>   | C    | positive regulation of CREB transcription factor activity, positive regulation of transcription by RNA polymerase II, protein homotetramerization                                                                                                                                                                                        | cAMP response element binding protein binding                                                               | -                                                                                                                                                                                                                                                                                                                                                                                                                                    | LOW (13.02)     | VERY LOW |
| <i>crtc1b</i>   | <i>CRTC1</i>   | C    | positive regulation of CREB transcription factor activity, positive regulation of transcription by RNA polymerase II, protein homotetramerization                                                                                                                                                                                        |                                                                                                             | -                                                                                                                                                                                                                                                                                                                                                                                                                                    | LOW (6.22)      | VERY LOW |
| <i>crtc2</i>    | <i>CRTC2</i>   | C    | positive regulation of CREB transcription factor activity, positive regulation of transcription by RNA polymerase II, protein homotetramerization                                                                                                                                                                                        |                                                                                                             | -                                                                                                                                                                                                                                                                                                                                                                                                                                    | (14.85)         |          |
| <i>crtc3</i>    | <i>CRTC3</i>   | C    | positive regulation of CREB transcription factor activity, positive regulation of transcription by RNA polymerase II, protein homotetramerization, response to hypoxia                                                                                                                                                                   |                                                                                                             | -                                                                                                                                                                                                                                                                                                                                                                                                                                    | [84]            |          |
|                 |                |      |                                                                                                                                                                                                                                                                                                                                          |                                                                                                             | -                                                                                                                                                                                                                                                                                                                                                                                                                                    | LOW (36.41)     | VERY LOW |
| <i>efcab1</i>   | <i>EFCAB1</i>  | C    | -                                                                                                                                                                                                                                                                                                                                        | Ca <sup>2+</sup> binding                                                                                    | -                                                                                                                                                                                                                                                                                                                                                                                                                                    | VERY LOW (1.25) | VERY LOW |
| <i>efcab11</i>  | <i>EFCAB11</i> | C    | -                                                                                                                                                                                                                                                                                                                                        |                                                                                                             | -                                                                                                                                                                                                                                                                                                                                                                                                                                    | VERY LOW (2.26) | VERY LOW |

|                      |                      |             |                                                         |                                                         |                                                                                                                                                                                                                                                                                                                                                                                                                                                                                                                                   |                                                                                                                                                     |                 |
|----------------------|----------------------|-------------|---------------------------------------------------------|---------------------------------------------------------|-----------------------------------------------------------------------------------------------------------------------------------------------------------------------------------------------------------------------------------------------------------------------------------------------------------------------------------------------------------------------------------------------------------------------------------------------------------------------------------------------------------------------------------|-----------------------------------------------------------------------------------------------------------------------------------------------------|-----------------|
| <i>efcab2</i>        | <i>EFCAB2</i>        | C           | -                                                       | Ca <sup>2+</sup> binding                                | -                                                                                                                                                                                                                                                                                                                                                                                                                                                                                                                                 | (0.75)                                                                                                                                              |                 |
| <i>efcab6</i>        | <i>EFCAB6</i>        | N           | -                                                       |                                                         | -                                                                                                                                                                                                                                                                                                                                                                                                                                                                                                                                 | (3.1)                                                                                                                                               |                 |
| <b><i>efcab7</i></b> | <b><i>EFCAB7</i></b> | PM          | -                                                       |                                                         | -                                                                                                                                                                                                                                                                                                                                                                                                                                                                                                                                 | VERY LOW<br>(14.98)                                                                                                                                 | VERY LOW        |
| <b><i>efcc1</i></b>  | <b><i>EFCC1</i></b>  | PM          | -                                                       |                                                         | -                                                                                                                                                                                                                                                                                                                                                                                                                                                                                                                                 | VERY LOW<br>(2.58)                                                                                                                                  | VERY LOW        |
| <i>efemp1</i>        | <i>EFEMP1</i>        | EM          | -                                                       | -                                                       | -                                                                                                                                                                                                                                                                                                                                                                                                                                                                                                                                 | (24.62)                                                                                                                                             |                 |
| <i>efemp2a</i>       | <i>EFEMP2</i>        | EM          | elastic fiber assembly                                  | Ca <sup>2+</sup> binding                                | -                                                                                                                                                                                                                                                                                                                                                                                                                                                                                                                                 | [6,7,85]<br>(2.77)                                                                                                                                  |                 |
| <i>efemp2b</i>       | <i>EFEMP2</i>        | EM          |                                                         |                                                         | -                                                                                                                                                                                                                                                                                                                                                                                                                                                                                                                                 | [1,60,86]<br>(89.22)                                                                                                                                |                 |
| <i>efhb</i>          | <i>EFHB</i>          | N/C         |                                                         |                                                         | -                                                                                                                                                                                                                                                                                                                                                                                                                                                                                                                                 | (1.33)                                                                                                                                              |                 |
| <i>efhc1</i>         | <i>EFHC1</i>         | PM          | -                                                       | -                                                       | -                                                                                                                                                                                                                                                                                                                                                                                                                                                                                                                                 | [7]<br>(2.72)                                                                                                                                       |                 |
| <b><i>efhc2</i></b>  | <b><i>EFHC2</i></b>  | C           | -                                                       | Ca <sup>2+</sup> binding                                | -                                                                                                                                                                                                                                                                                                                                                                                                                                                                                                                                 | VERY LOW<br>(2.34)                                                                                                                                  | VERY LOW        |
| <b><i>efhd1</i></b>  | <b><i>EFHD1</i></b>  | Mt          | -                                                       |                                                         | -                                                                                                                                                                                                                                                                                                                                                                                                                                                                                                                                 | HIGH (67.44)                                                                                                                                        | MEDIUM          |
| <b><i>efhd2</i></b>  | <b><i>EFHD2</i></b>  | PM          | -                                                       |                                                         | -                                                                                                                                                                                                                                                                                                                                                                                                                                                                                                                                 | LOW (73.39)                                                                                                                                         | LOW             |
| <i>egfl7</i>         | <i>EGFL7</i>         | EM          | anatomical structure development,<br>vasculogenesis     | Ca <sup>2+</sup> binding, signaling receptor<br>binding | hemorrhagic brain, abnormal intersegmental<br>vessel morphology, <i>emilin3a</i> and <i>tp53</i> expression<br>increased, disrupted blood circulation, abnormal<br>axial vasculature, mislocalised and unlumenized<br>dorsal aorta, disrupted establishment or<br>maintenance of epithelial cell apical/basal<br>polarity, deformed posterior cardinal vein,<br>increased amount and mislocalised blood vessel<br>endothelial cell bicellular tight junction,<br>disrupted migration of blood vessel endothelial<br>cells [87-89] | [90,91]<br>(3.37)                                                                                                                                   |                 |
| <i>ehd1a</i>         | <i>EHD1</i>          | PM/EM       | cilium assembly                                         | GTP binding, Ca <sup>2+</sup> binding                   | -                                                                                                                                                                                                                                                                                                                                                                                                                                                                                                                                 | [92]<br>(26.72)                                                                                                                                     |                 |
| <i>ehd2a</i>         | <i>EHD2</i>          | PM/C        | actin cytoskeleton organization, endocytic<br>recycling |                                                         | -                                                                                                                                                                                                                                                                                                                                                                                                                                                                                                                                 | (0.29)                                                                                                                                              |                 |
| <i>ehd2b</i>         | <i>EHD2</i>          | PM/EM<br>/C |                                                         |                                                         | -                                                                                                                                                                                                                                                                                                                                                                                                                                                                                                                                 | [7]<br>(11.29)                                                                                                                                      |                 |
| <i>ehd3</i>          | <i>EHD3</i>          | PM/N        | cilium assembly, endocytic recycling                    |                                                         |                                                                                                                                                                                                                                                                                                                                                                                                                                                                                                                                   | decreased amount of photoreceptors in the<br>outer segment layer, decreased amount and<br>abnormal morphology of neuromast hair cell<br>cilium [92] | [92]<br>(25.46) |



|                 |                |        |                                                                                                                                                                              |                                                                                                             |                                                                                                         |               |          |
|-----------------|----------------|--------|------------------------------------------------------------------------------------------------------------------------------------------------------------------------------|-------------------------------------------------------------------------------------------------------------|---------------------------------------------------------------------------------------------------------|---------------|----------|
| <i>ehd4</i>     | <i>EHD4</i>    | N      | endocytic recycling                                                                                                                                                          | GTP binding, Ca <sup>2+</sup> binding                                                                       | -                                                                                                       | [7]<br>(7.62) |          |
| <i>eps15</i>    | <i>EPS15</i>   | PM/C   | -                                                                                                                                                                            | Ca <sup>2+</sup> binding                                                                                    | -                                                                                                       | (47.61)       |          |
| <i>eps15/1a</i> | <i>EPS15L1</i> | PM/N/C | -                                                                                                                                                                            | -                                                                                                           | -                                                                                                       | (10.52)       |          |
| <i>eps15/1b</i> | <i>EPS15L1</i> | PM/N/C | T cell differentiation in thymus                                                                                                                                             | -                                                                                                           | thymus <i>lck</i> and <i>rag1</i> expression decreased, T cell differentiation in thymus disrupted [93] | (1.64)        | [93]     |
| <i>faim2a</i>   | <i>FAIM2</i>   | PM     | -                                                                                                                                                                            | -                                                                                                           | -                                                                                                       | LOW (18.35)   | VERY LOW |
| <i>faim2b</i>   | <i>FAIM2</i>   | PM     | -                                                                                                                                                                            | -                                                                                                           | -                                                                                                       | (0.09)        |          |
| <i>fbln1</i>    | <i>FBLN1</i>   | EM     | extracellular matrix organization, embryonic medial fin morphogenesis, heart development, mesenchymal cell migration, multicellular organism development, skin morphogenesis | Ca <sup>2+</sup> binding, peptidase activator activity                                                      | -                                                                                                       | (19.35)       | [17,85]  |
| <i>fbln2</i>    | <i>FBLN2</i>   | EM     | extracellular matrix organization                                                                                                                                            | Ca <sup>2+</sup> binding                                                                                    | -                                                                                                       | (3.68)        | [7,85]   |
| <i>fbln5</i>    | <i>FBLN5</i>   | EM     | elastic fiber assembly                                                                                                                                                       |                                                                                                             | -                                                                                                       | (2.95)        | [85]     |
| <i>fbln7</i>    | <i>FBLN7</i>   | EM     | -                                                                                                                                                                            |                                                                                                             | -                                                                                                       | (2.82)        | [94]     |
| <i>fbn2a</i>    | <i>FBN2</i>    | EM     | -                                                                                                                                                                            | Ca <sup>2+</sup> binding, extracellular matrix structural constituent                                       | -                                                                                                       | (4.12)        |          |
| <i>fkbp1aa</i>  | <i>FKBP1A</i>  | C      | chaperone-mediated protein folding, protein peptidyl-prolyl isomerization                                                                                                    | isomerase activity, peptidyl-prolyl cis-trans isomerase activity                                            | -                                                                                                       | (54.61)       |          |
| <i>fkbp1b</i>   | <i>FKBP1B</i>  | C      |                                                                                                                                                                              |                                                                                                             | -                                                                                                       | (21.76)       |          |
| <i>fkbp2</i>    | <i>FKBP2</i>   | EM/ER  | -                                                                                                                                                                            |                                                                                                             | -                                                                                                       | (14.38)       |          |
| <i>fkbp3</i>    | <i>FKBP3</i>   | N      | -                                                                                                                                                                            |                                                                                                             | -                                                                                                       | (18.5)        |          |
| <i>fkbp4</i>    | <i>FKBP4</i>   | C      | chaperone-mediated protein folding, protein peptidyl-prolyl isomerization                                                                                                    | FK506 binding, heat shock protein binding, isomerase activity, peptidyl-prolyl cis-trans isomerase activity | abnormal neurogenesis, curved and decreased length of body [95]                                         | (105.76)      | [95]     |
| <i>fkbp5</i>    | <i>FKBP5</i>   | C      |                                                                                                                                                                              | peptidyl-prolyl cis-trans isomerase activity                                                                | -                                                                                                       | (24.23)       | [96,97]  |
| <i>fkbp6</i>    | <i>FKBP6</i>   | C      | -                                                                                                                                                                            | peptidyl-prolyl cis-trans isomerase activity                                                                | -                                                                                                       | (0.07)        |          |
| <i>fkbp7</i>    | <i>FKBP7</i>   | EM     | -                                                                                                                                                                            | Ca <sup>2+</sup> binding, isomerase activity, peptidyl-prolyl cis-trans isomerase activity                  | -                                                                                                       | (1.67)        |          |
| <i>fkbp8</i>    | <i>FKBP8</i>   | PM     | -                                                                                                                                                                            | isomerase activity, peptidyl-prolyl cis-trans isomerase activity                                            | -                                                                                                       | (26.7)        |          |

|                      |                     |    |                                                                                                                                                                                                  |                                                                                                                                     |                                                                                                                                                                                                                                          |                               |          |
|----------------------|---------------------|----|--------------------------------------------------------------------------------------------------------------------------------------------------------------------------------------------------|-------------------------------------------------------------------------------------------------------------------------------------|------------------------------------------------------------------------------------------------------------------------------------------------------------------------------------------------------------------------------------------|-------------------------------|----------|
| <i>fkbp9</i>         | <i>FKBP9</i>        | ER | -                                                                                                                                                                                                | Ca <sup>2+</sup> binding, isomerase activity, peptidyl-prolyl cis-trans isomerase activity                                          | -                                                                                                                                                                                                                                        | (6.49)                        |          |
| <i>fkbp10a</i>       | <i>FKBP10</i>       | C  | chaperone-mediated protein folding                                                                                                                                                               | Ca <sup>2+</sup> binding, FK506 binding, isomerase activity, peptidyl-prolyl cis-trans isomerase activity                           | -                                                                                                                                                                                                                                        | (7.41)                        |          |
| <i>fkbp10b</i>       | <i>FKBP10</i>       | ER | -                                                                                                                                                                                                | Ca <sup>2+</sup> binding, isomerase activity, peptidyl-prolyl cis-trans isomerase activity                                          | -                                                                                                                                                                                                                                        | [7,98]<br>(6.38)              |          |
| <i>fkbp14</i>        | <i>FKBP14</i>       | ER | -                                                                                                                                                                                                | -                                                                                                                                   | -                                                                                                                                                                                                                                        | [7]<br>(1.04)                 |          |
| <i>fkbp1</i>         | <i>FKBPL</i>        | ER | vasculature development                                                                                                                                                                          | -                                                                                                                                   | vasculature development disrupted [99]                                                                                                                                                                                                   | (10.5)                        |          |
| <b><i>ghitm</i></b>  | <b><i>GHITM</i></b> | Mt | -                                                                                                                                                                                                | -                                                                                                                                   | -                                                                                                                                                                                                                                        | VERY LOW<br>(44.49)           | VERY LOW |
| <i>gpat4</i>         | <i>GPAT4</i>        | PM | -                                                                                                                                                                                                | transferase activity, transferring acyl groups                                                                                      | -                                                                                                                                                                                                                                        | (33.2)                        |          |
| <i>gria1b</i>        | <i>GRIA1</i>        | PM |                                                                                                                                                                                                  |                                                                                                                                     | -                                                                                                                                                                                                                                        | [100,101]<br>(2.16)           |          |
| <i>gria2a</i>        | <i>GRIA2</i>        | PM | anterior lateral line development, embryonic cranial skeleton morphogenesis, ion transport, nervous system development, neural crest cell development, posterior lateral line system development |                                                                                                                                     | increased size of fourth and third ventricles, decreased size of head, increased apoptosis, decreased amount of neuromasts in lateral line, abnormal motor neurons, abnormal cranial cartilage, abnormal migration of neural crest [102] | [6,100,101]<br>(11.02)        |          |
| <i>gria2b</i>        | <i>GRIA2</i>        | PM | ion transport                                                                                                                                                                                    | AMPA glutamate receptor activity, ionotropic glutamate receptor activity, signaling receptor activity                               | -                                                                                                                                                                                                                                        | [100,101]<br>(360.24)         |          |
| <i>gria3a</i>        | <i>GRIA3</i>        | PM |                                                                                                                                                                                                  |                                                                                                                                     | increased mortality [28]                                                                                                                                                                                                                 | [100,101]<br>(207.38)         |          |
| <i>gria3b</i>        | <i>GRIA3</i>        | PM |                                                                                                                                                                                                  |                                                                                                                                     | -                                                                                                                                                                                                                                        | [6,100,101]<br>(25.47)        |          |
| <i>gria4a</i>        | <i>GRIA4</i>        | PM |                                                                                                                                                                                                  |                                                                                                                                     | -                                                                                                                                                                                                                                        | [100,101,103]<br>(347.99)     |          |
| <i>gria4b</i>        | <i>GRIA4</i>        | PM |                                                                                                                                                                                                  |                                                                                                                                     | -                                                                                                                                                                                                                                        | [6,100,101,104]<br>(14.66)    |          |
| <b><i>grin1a</i></b> | <b><i>GRIN1</i></b> | PM | G protein-coupled receptor signaling pathway, ion transport                                                                                                                                      | G protein-coupled receptor activity, NMDA glutamate receptor activity, ion channel activity, ionotropic glutamate receptor activity | -                                                                                                                                                                                                                                        | [105,106]<br>HIGH<br>(459.99) | LOW      |

|                |               |      |                                                                                                                                       |                                                                                                                                                            |                                                                                                                                |                       |
|----------------|---------------|------|---------------------------------------------------------------------------------------------------------------------------------------|------------------------------------------------------------------------------------------------------------------------------------------------------------|--------------------------------------------------------------------------------------------------------------------------------|-----------------------|
| <i>grin1b</i>  | <i>GRIN1</i>  | PM   | ion transport                                                                                                                         | NMDA glutamate receptor activity, ion channel activity, ionotropic glutamate receptor activity                                                             | -                                                                                                                              | [105,106]<br>(250.15) |
| <i>grin2aa</i> | <i>GRIN2A</i> | PM   | excitatory postsynaptic potential, ion transport, long-term synaptic potentiation                                                     |                                                                                                                                                            | -                                                                                                                              | (103.48)              |
| <i>grin2ab</i> | <i>GRIN2A</i> | PM   |                                                                                                                                       |                                                                                                                                                            | -                                                                                                                              | (27.37)               |
| <i>grin2bb</i> | <i>GRIN2B</i> | PM   |                                                                                                                                       |                                                                                                                                                            | -                                                                                                                              | (188.21)              |
| <i>grin2cb</i> | <i>GRIN2C</i> | PM   |                                                                                                                                       |                                                                                                                                                            | -                                                                                                                              | [107]<br>(0.68)       |
| <i>grin2da</i> | <i>GRIN2D</i> | PM   |                                                                                                                                       |                                                                                                                                                            | -                                                                                                                              | [7]<br>(43.53)        |
| <i>grin3a</i>  | <i>GRIN3A</i> | PM   | ion transport                                                                                                                         | ion channel activity, ionotropic glutamate receptor activity                                                                                               | -                                                                                                                              | (17.36)               |
| <i>grin3ba</i> | <i>GRIN3B</i> | PM   |                                                                                                                                       |                                                                                                                                                            | -                                                                                                                              | (7.03)                |
| <i>grin3bb</i> | <i>GRIN3B</i> | PM   |                                                                                                                                       |                                                                                                                                                            | -                                                                                                                              | (3.71)                |
| <i>grinaa</i>  | <i>GRINA</i>  | PM   | -                                                                                                                                     | -                                                                                                                                                          | -                                                                                                                              | (83.79)               |
| <i>grinab</i>  | <i>GRINA</i>  | PM   | negative regulation of apoptotic process, negative regulation of neuron death                                                         | -                                                                                                                                                          | increased occurrence of programmed cell death, abnormal organisation of central nervous system, abnormal head morphology [108] | [7,108]<br>(5.24)     |
| <i>hp</i>      | <i>HP</i>     | EM   | proteolysis                                                                                                                           | hemoglobin binding, serine-type endopeptidase activity                                                                                                     |                                                                                                                                | [109]<br>(0.06)       |
| <i>hpca</i>    | <i>HPCA</i>   | C    | -                                                                                                                                     | Ca <sup>2+</sup> binding                                                                                                                                   | -                                                                                                                              | [7,21]<br>(23.04)     |
| <i>hpcal1</i>  | <i>HPCAL</i>  | C    | -                                                                                                                                     |                                                                                                                                                            | -                                                                                                                              | (33.44)               |
| <i>hpcal4</i>  | <i>HPCAL4</i> | C    | -                                                                                                                                     |                                                                                                                                                            | -                                                                                                                              | (127.7)               |
| <i>hrc</i>     | <i>HRC</i>    | PM   | -                                                                                                                                     | -                                                                                                                                                          | -                                                                                                                              | [7]<br>(0.12)         |
| <i>itpr1a</i>  | <i>ITPR1</i>  | ER   | Ca <sup>2+</sup> transmembrane transport                                                                                              | Ca <sup>2+</sup> channel activity, inositol 1,4,5 trisphosphate binding, inositol 1,4,5-trisphosphate-sensitive Ca <sup>2+</sup> -release channel activity | -                                                                                                                              | (0.25)                |
| <i>itpr1b</i>  | <i>ITPR1</i>  | ER   |                                                                                                                                       |                                                                                                                                                            | -                                                                                                                              | [21]<br>(160.88)      |
| <i>itpr2</i>   | <i>ITPR2</i>  | ER   | Ca <sup>2+</sup> transmembrane transport, release of sequestered Ca <sup>2+</sup> into cytosol                                        |                                                                                                                                                            | -                                                                                                                              | (22.79)               |
| <i>itpr3</i>   | <i>ITPR3</i>  | ER   | Ca <sup>2+</sup> transmembrane transport, release of sequestered Ca <sup>2+</sup> into cytosol, embryonic skeletal system development |                                                                                                                                                            | malformed notochord [110]                                                                                                      | [111]<br>(0.16)       |
| <i>itsn1</i>   | <i>ITSN1</i>  | PM/C | intracellular signal transduction, regulation of Rho protein signal transduction                                                      | Ca <sup>2+</sup> binding, Rho-guanyl-nucleotide exchange factor activity                                                                                   | -                                                                                                                              | (106.01)              |
| <i>itsn2a</i>  | <i>ITSN2</i>  | EM/C | endocytosis, intracellular signal transduction, regulation of Rho protein signal transduction                                         |                                                                                                                                                            | -                                                                                                                              | (1.63)                |
| <i>itsn2b</i>  | <i>ITSN2</i>  | EM/C | endocytosis, regulation of Rho protein signal transduction                                                                            |                                                                                                                                                            | -                                                                                                                              | (9.26)                |

|                |               |     |                                                                                                                 |                                                                                                                                       |                                                                                                                                                                                                             |                              |          |
|----------------|---------------|-----|-----------------------------------------------------------------------------------------------------------------|---------------------------------------------------------------------------------------------------------------------------------------|-------------------------------------------------------------------------------------------------------------------------------------------------------------------------------------------------------------|------------------------------|----------|
| <i>kcnip1a</i> | <i>KCNIP1</i> | C/N | cilium movement                                                                                                 | -                                                                                                                                     | determination of left/right symmetry disrupted, otolith morphology, ventricular system hydrocephalic, whole organism anterior-posterior axis curved, Kupffer's vesicle motile cilium decreased amount [112] | [112]<br>(11.46)             |          |
| <i>kcnip1b</i> | <i>KCNIP1</i> | PM  | -                                                                                                               | Ca <sup>2+</sup> binding                                                                                                              | abnormal heart contraction [113]                                                                                                                                                                            | [7]<br>(10.81)               |          |
| <i>kcnip2</i>  | <i>KCNIP2</i> | PM  | -                                                                                                               |                                                                                                                                       | -                                                                                                                                                                                                           | (1.6)                        |          |
| <i>kcnip3a</i> | <i>KCNIP3</i> | PM  | -                                                                                                               |                                                                                                                                       | -                                                                                                                                                                                                           | [7]<br>(54.48)               |          |
| <i>kcnip3b</i> | <i>KCNIP3</i> | PM  | endocrine pancreas development                                                                                  |                                                                                                                                       | affected pancreatic endocrine development [114]                                                                                                                                                             | [7]<br>(3.5)                 |          |
| <i>kcma1a</i>  | <i>KCNMA1</i> | PM  | potassium ion transmembrane transport, regulation of ion transmembrane transport, response to auditory stimulus | large conductance Ca <sup>2+</sup> -activated potassium channel activity, metal ion binding, voltage-gated potassium channel activity | abnormal response to auditory stimulus, abnormal swimming behavior [115]                                                                                                                                    | LOW<br>(214.51)              | VERY LOW |
| <i>kcma1b</i>  | <i>KCNMA1</i> | PM  | potassium ion transport, regulation of membrane potential, response to auditory stimulus                        | large conductance Ca <sup>2+</sup> -activated potassium channel activity, outward rectifier potassium channel activity                |                                                                                                                                                                                                             | VERY LOW<br>(6.52)           | VERY LOW |
| <i>kcmb2</i>   | <i>KCNMB2</i> | PM  | detection of Ca <sup>2+</sup> , potassium ion transport                                                         | Ca <sup>2+</sup> -activated potassium channel activity, potassium channel regulator activity                                          | -                                                                                                                                                                                                           | (0.13)                       |          |
| <i>kcnn1a</i>  | <i>KCNN1</i>  | PM  | potassium ion transmembrane transport                                                                           | small conductance Ca <sup>2+</sup> -activated potassium channel activity, calmodulin binding                                          | -                                                                                                                                                                                                           | VERY LOW<br>(105.96)         | VERY LOW |
| <i>kcnn1b</i>  | <i>KCNN1</i>  | PM  |                                                                                                                 |                                                                                                                                       | -                                                                                                                                                                                                           | [116]<br>VERY LOW<br>(12.47) | VERY LOW |
| <i>kcnn3</i>   | <i>KCNN3</i>  | PM  |                                                                                                                 |                                                                                                                                       | -                                                                                                                                                                                                           | (56.58)                      |          |
| <i>kcnn4</i>   | <i>KCNN4</i>  | PM  |                                                                                                                 |                                                                                                                                       | -                                                                                                                                                                                                           | (1.17)                       |          |
| <i>kcnt1</i>   | <i>KCNT1</i>  | PM  | potassium ion transport, regulation of membrane potential                                                       | intracellular sodium activated potassium channel activity, outward rectifier potassium channel activity                               | -                                                                                                                                                                                                           | LOW (57.4)                   | VERY LOW |
| <i>kcnt2</i>   | <i>KCNT2</i>  | PM  |                                                                                                                 |                                                                                                                                       | -                                                                                                                                                                                                           | (1.47)                       |          |
| <i>lats1</i>   | <i>LATS1</i>  | C   | G1/S transition of mitotic cell cycle, convergent extension involved in gastrulation, hippo                     | ATP binding, protein serine/threonine kinase                                                                                          | disrupted convergent extension involved in gastrulation [117]                                                                                                                                               | [117]<br>(37.58)             |          |

|               |               |       |                                                                                                                                                                             |                                                                                                                                  |                                                                                                                                                                                                                                                                                                                                                                    |                             |                 |
|---------------|---------------|-------|-----------------------------------------------------------------------------------------------------------------------------------------------------------------------------|----------------------------------------------------------------------------------------------------------------------------------|--------------------------------------------------------------------------------------------------------------------------------------------------------------------------------------------------------------------------------------------------------------------------------------------------------------------------------------------------------------------|-----------------------------|-----------------|
| <i>lats2</i>  | <i>LATS2</i>  | C/N   | signaling, intracellular signal transduction, peptidyl-serine phosphorylation, positive regulation of apoptotic process, regulation of organ growth                         | activity, transferase activity                                                                                                   |                                                                                                                                                                                                                                                                                                                                                                    | [117]<br><b>(1.36)</b>      |                 |
| <i>letm1</i>  | <i>LETM1</i>  | Mt    | Ca <sup>2+</sup> export from the mitochondrion, Ca <sup>2+</sup> transport, mitochondrial Ca <sup>2+</sup> homeostasis, protein hexamerization, protein homooligomerization | Ca <sup>2+</sup> binding, Ca <sup>2+</sup> :proton antiporter activity, ribosome binding                                         | -                                                                                                                                                                                                                                                                                                                                                                  | <b>VERY LOW (1.81)</b>      | <b>VERY LOW</b> |
| <i>letm2</i>  | <i>LETM2</i>  | Mt    | -                                                                                                                                                                           | ribosome binding                                                                                                                 | -                                                                                                                                                                                                                                                                                                                                                                  | <b>LOW (34.24)</b>          | <b>LOW</b>      |
| <i>letmd1</i> | <i>LETMD1</i> | Mt    | -                                                                                                                                                                           |                                                                                                                                  | -                                                                                                                                                                                                                                                                                                                                                                  | <b>(0.42)</b>               |                 |
| <i>lpcat1</i> | <i>LPCAT1</i> | G/ER  | lipid metabolic process, phospholipid biosynthetic process                                                                                                                  | 1-acylglycerophosphocholine O-acyltransferase activity, Ca <sup>2+</sup> binding, transferase activity, transferring acyl groups | -                                                                                                                                                                                                                                                                                                                                                                  | <b>(4.37)</b>               |                 |
| <i>lpcat2</i> | <i>LPCAT2</i> | G/ER  |                                                                                                                                                                             | -                                                                                                                                | <b>(3.46)</b>                                                                                                                                                                                                                                                                                                                                                      |                             |                 |
| <i>lpcat3</i> | <i>LPCAT3</i> | PM    | -                                                                                                                                                                           | -                                                                                                                                | -                                                                                                                                                                                                                                                                                                                                                                  | <b>(3.41)</b>               |                 |
| <i>lpcat4</i> | <i>LPCAT4</i> | PM    | -                                                                                                                                                                           | Ca <sup>2+</sup> binding, transferase activity, transferring acyl groups                                                         | -                                                                                                                                                                                                                                                                                                                                                                  | [7]<br><b>(1.36)</b>        |                 |
| <i>ltbp1</i>  | <i>LTBP1</i>  | EM/ER | -                                                                                                                                                                           | Ca <sup>2+</sup> binding                                                                                                         | -                                                                                                                                                                                                                                                                                                                                                                  | <b>(1.02)</b>               |                 |
| <i>ltbp3</i>  | <i>LTBP3</i>  | EM    | cardiac ventricle morphogenesis, outflow tract morphogenesis, regulation of smooth muscle tissue development                                                                | -                                                                                                                                | decreased amount of intestine smooth muscle cells, disrupted migration of lateral plate mesoderm tissue, abnormal cardiac ventricle, abnormal heart looping, abnormal outflow tract morphogenesis, hypoplastic presumptive bulbus arteriosus, decreased signaling via transforming growth factor beta receptor pathway, malformed pharyngeal vasculature [118,119] | [120-123]<br><b>(11.93)</b> |                 |
| <i>mast1a</i> | <i>MAST1</i>  | PM    | cytoskeleton organization, intracellular signal transduction, peptidyl-serine phosphorylation                                                                               | ATP binding, kinase activity, magnesium ion bindin, protein serine/threonine kinase activity, transferase activity               | -                                                                                                                                                                                                                                                                                                                                                                  | <b>(51.16)</b>              |                 |
| <i>mast1b</i> | <i>MAST1</i>  | PM    | protein phosphorylation                                                                                                                                                     |                                                                                                                                  | -                                                                                                                                                                                                                                                                                                                                                                  | [60]<br><b>(74.33)</b>      |                 |
| <i>mast2</i>  | <i>MAST2</i>  | PM/C  | cytoskeleton organization, intracellular signal transduction, peptidyl-serine phosphorylation, regulation of interleukin-12 biosynthetic process                            |                                                                                                                                  | -                                                                                                                                                                                                                                                                                                                                                                  | <b>(37.64)</b>              |                 |
| <i>mast3a</i> | <i>MAST3</i>  | PM/C  | protein phosphorylation                                                                                                                                                     | ATP binding, magnesium ion binding, protein serine/threonine kinase activity                                                     | -                                                                                                                                                                                                                                                                                                                                                                  | <b>(7.12)</b>               |                 |

|                     |                     |      |                                                                                                                                                                                                                                                                                                                                                                               |                                                                                                                     |                                                                                                                                                                                                                                               |                                                        |                 |
|---------------------|---------------------|------|-------------------------------------------------------------------------------------------------------------------------------------------------------------------------------------------------------------------------------------------------------------------------------------------------------------------------------------------------------------------------------|---------------------------------------------------------------------------------------------------------------------|-----------------------------------------------------------------------------------------------------------------------------------------------------------------------------------------------------------------------------------------------|--------------------------------------------------------|-----------------|
| <i>mast3b</i>       | <i>MAST3</i>        | PM/C | intracellular signal transduction, peptidyl-serine phosphorylation                                                                                                                                                                                                                                                                                                            | ATP binding, kinase activity, magnesium ion binding, protein serine/threonine kinase activity, transferase activity | -                                                                                                                                                                                                                                             | <b>(87.53)</b>                                         |                 |
| <i>mast4</i>        | <i>MAST4</i>        | C    |                                                                                                                                                                                                                                                                                                                                                                               | protein serine/threonine kinase activity                                                                            | -                                                                                                                                                                                                                                             | <b>(226.83)</b>                                        |                 |
| <i>mastl</i>        | <i>MASTL</i>        | C/N  | G2/M transition of mitotic cell cycle, cell cycle, cell division, cellular response to DNA damage stimulus, intracellular signal transduction, negative regulation of phosphoprotein phosphatase activity, peptidyl-serine phosphorylation, thrombocyte differentiation                                                                                                       | ATP binding, protein phosphatase 2A binding, protein serine/threonine kinase activity, transferase activity         | decreased amount and disrupted differentiation of thrombocytes [124]                                                                                                                                                                          | <b>(2.46)</b> [7]                                      |                 |
| <i>mcu</i>          | <i>MCU</i>          | Mt   | actin filament organization, Ca <sup>2+</sup> import into the mitochondrion, Ca <sup>2+</sup> -mediated signaling, chordate embryonic development, convergent extension involved in gastrulation, glucose homeostasis, mitochondrial Ca <sup>2+</sup> homeostasis, positive regulation of insulin secretion, protein complex oligomerization, regulation of heart contraction | Ca <sup>2+</sup> channel activity, identical protein binding, uniporter activity                                    | abnormal actin polymerization and depolymerization, disrupted anterior/posterior axis specification, cell migration involved in gastrulation, disrupted mitochondrial Ca <sup>2+</sup> homeostasis, bent notochord [125]                      | <b>(3.55)</b> [126]                                    |                 |
| <u><i>micu1</i></u> | <u><i>MICU1</i></u> | Mt   | Ca <sup>2+</sup> import, mitochondrial Ca <sup>2+</sup> transmembrane transport, positive regulation of mitochondrial Ca <sup>2+</sup> concentration                                                                                                                                                                                                                          | Ca <sup>2+</sup> binding                                                                                            | -                                                                                                                                                                                                                                             | <b>[127]</b><br><b>VERY LOW (71.5)</b> <b>VERY LOW</b> |                 |
| <i>micu2</i>        | <i>MICU2</i>        | Mt   | -                                                                                                                                                                                                                                                                                                                                                                             |                                                                                                                     | -                                                                                                                                                                                                                                             | <b>VERY LOW (5.77)</b>                                 | <b>VERY LOW</b> |
| <i>micu3a</i>       | <i>MICU3</i>        | Mt   | -                                                                                                                                                                                                                                                                                                                                                                             |                                                                                                                     | -                                                                                                                                                                                                                                             | <b>LOW (9.8)</b>                                       | <b>LOW</b>      |
| <i>micu3b</i>       | <i>MICU3</i>        | Mt   | mitochondrial Ca <sup>2+</sup> transmembrane transport                                                                                                                                                                                                                                                                                                                        |                                                                                                                     |                                                                                                                                                                                                                                               | <b>(3.33)</b>                                          |                 |
| <i>myl10</i>        | <i>MYL10</i>        | Mt/C | -                                                                                                                                                                                                                                                                                                                                                                             |                                                                                                                     | -                                                                                                                                                                                                                                             | <b>[60,128,129]</b><br><b>(0.18)</b>                   |                 |
| <i>myl2b</i>        | <i>MYL2</i>         | EM/C | -                                                                                                                                                                                                                                                                                                                                                                             |                                                                                                                     | heart morphogenesis disrupted [130]                                                                                                                                                                                                           | <b>[128,131]</b><br><b>(0.07)</b>                      |                 |
| <i>myl6</i>         | <i>MYL6</i>         | EM/C | -                                                                                                                                                                                                                                                                                                                                                                             |                                                                                                                     | -                                                                                                                                                                                                                                             | <b>(8.05)</b>                                          |                 |
| <i>myl7</i>         | <i>MYL7</i>         | C    | atrial cardiac myofibril assembly, cardiac muscle cell proliferation, cardiac muscle tissue development, positive regulation of heart contraction, sarcomere organization, ventricular cardiac muscle cell development, ventricular cardiac myofibril assembly                                                                                                                |                                                                                                                     | decreased length of cardiac muscle sarcomeres, increased size of cardiac ventricle, edematous pericardium, decreased contractility and volume of cardiac ventricle, disrupted heart contraction, abnormal cardiac muscle cell shape [128,132] | <b>(0.28)</b> [133-141]                                |                 |

|               |               |        |                                                                                                                                                        |                                                                                                 |   |                        |          |
|---------------|---------------|--------|--------------------------------------------------------------------------------------------------------------------------------------------------------|-------------------------------------------------------------------------------------------------|---|------------------------|----------|
| <i>myl9a</i>  | <i>MYL9</i>   | C      | -                                                                                                                                                      | Ca <sup>2+</sup> binding                                                                        | - | [7,142]<br>(10.06)     |          |
| <i>myl9b</i>  | <i>MYL9</i>   | C      | -                                                                                                                                                      |                                                                                                 | - | [143]<br>(17.89)       |          |
| <i>mylpfb</i> | <i>MYLPF</i>  | C      | -                                                                                                                                                      |                                                                                                 | - | [6,7,128]<br>(1.42)    |          |
| <i>ncs1a</i>  | <i>NCS1</i>   | PM     | semicircular canal development                                                                                                                         |                                                                                                 | - | [7,111,144]<br>(32.11) |          |
| <i>ncs1b</i>  | <i>NCS1</i>   | PM     | -                                                                                                                                                      |                                                                                                 | - | [144]<br>(26.82)       |          |
| <i>necab1</i> | <i>NECAB1</i> | C      | regulation of amyloid precursor protein biosynthetic process                                                                                           |                                                                                                 | - | [7,145]<br>(6.98)      |          |
| <i>necab2</i> | <i>NECAB2</i> | PM     |                                                                                                                                                        |                                                                                                 | - | [7,145]<br>(42.54)     |          |
| <i>necab3</i> | <i>NECAB3</i> | C      | regulation of amyloid precursor protein biosynthetic process                                                                                           |                                                                                                 | - | (43.03)                |          |
| <i>nell2a</i> | <i>NELL2</i>  | EM     | -                                                                                                                                                      |                                                                                                 | - | (86.76)                |          |
| <i>nell2b</i> | <i>NELL2</i>  | EM     | -                                                                                                                                                      |                                                                                                 | - | (223.22)               |          |
| <i>nox5</i>   | <i>NOX5</i>   | PM     | neutrophil migration, oxidation-reduction process, superoxide anion generation                                                                         | Ca <sup>2+</sup> binding, oxidoreductase activity, superoxide-generating NADPH oxidase activity | - | [146]<br>(0.99)        |          |
| <i>nucb1</i>  | <i>NUCB1</i>  | EM/ER  | -                                                                                                                                                      | Ca <sup>2+</sup> binding                                                                        | - | (40.69)                |          |
| <i>nucb2b</i> | <i>NUCB2</i>  | EM/G   | response to food                                                                                                                                       |                                                                                                 | - | [7,147]<br>(8.66)      |          |
| <i>orai1a</i> | <i>ORAI1</i>  | PM     | store-operated Ca <sup>2+</sup> entry                                                                                                                  | store-operated Ca <sup>2+</sup> channel activity                                                | - | RT-PCR<br>(1.84)       |          |
| <i>orai2</i>  | <i>ORAI2</i>  | PM     | store-operated Ca <sup>2+</sup> entry                                                                                                                  | store-operated Ca <sup>2+</sup> channel activity                                                | - | RT-PCR<br>(11.23)      |          |
| <i>ormdl1</i> | <i>ORMDL1</i> | ER     | cellular sphingolipid homeostasis, negative regulation of ceramide biosynthetic process, negative regulation of sphingolipid biosynthetic process      | -                                                                                               | - | (17.11)                |          |
| <i>ormdl2</i> | <i>ORMDL2</i> | ER     |                                                                                                                                                        | -                                                                                               | - | (9.43)                 |          |
| <i>ormdl3</i> | <i>ORMDL3</i> | ER     |                                                                                                                                                        | -                                                                                               | - | LOW (0.95)             | VERY LOW |
| <i>pdpk1a</i> | <i>PDPK1</i>  | PM/N/C | intracellular signal transduction, peptidyl-serine phosphorylation                                                                                     | ATP binding, protein serine/threonine kinase activity                                           | - | (9.71)                 |          |
| <i>pdpk1b</i> | <i>PDPK1</i>  | PM/N/C |                                                                                                                                                        |                                                                                                 | - | (67.88)                |          |
| <i>pdzd8</i>  | <i>PDZD8</i>  | ER     | intracellular signal transduction, lipid transport, mitochondrial Ca <sup>2+</sup> homeostasis, mitochondrion-endoplasmic reticulum membrane tethering | lipid binding, metal ion binding                                                                | - | VERY LOW (4.6)         | VERY LOW |

|              |              |      |                                                                                                                                                                                                                                                                                                                                                                                                                                                                                                                           |                                                                                                                                           |                                                                                                                                                                                                                                                                                                                                                                                             |                          |
|--------------|--------------|------|---------------------------------------------------------------------------------------------------------------------------------------------------------------------------------------------------------------------------------------------------------------------------------------------------------------------------------------------------------------------------------------------------------------------------------------------------------------------------------------------------------------------------|-------------------------------------------------------------------------------------------------------------------------------------------|---------------------------------------------------------------------------------------------------------------------------------------------------------------------------------------------------------------------------------------------------------------------------------------------------------------------------------------------------------------------------------------------|--------------------------|
| <i>pkn1a</i> | <i>PKN1</i>  | N/C  | intracellular signal transduction, peptidyl-serine phosphorylation                                                                                                                                                                                                                                                                                                                                                                                                                                                        | ATP binding, GTP-Rho binding, protein serine/threonine kinase activity, transferase activity                                              | -                                                                                                                                                                                                                                                                                                                                                                                           | (15.94)                  |
| <i>pkn1b</i> | <i>PKN1</i>  | N/C  |                                                                                                                                                                                                                                                                                                                                                                                                                                                                                                                           |                                                                                                                                           | -                                                                                                                                                                                                                                                                                                                                                                                           | (51.43)                  |
| <i>pkn2</i>  | <i>PKN2</i>  | N/C  | embryonic viscerocranium morphogenesis, heart development, intracellular signal transduction, peptidyl-serine phosphorylation                                                                                                                                                                                                                                                                                                                                                                                             |                                                                                                                                           | edematous brain, decreased size of cranial cartilage, eyes and head, decreased amount of melanocytes, curved trunk, edematous pericardium, decrease body length [148]                                                                                                                                                                                                                       | (4.24)                   |
| <i>pkn3</i>  | <i>PKN3</i>  | N    | intracellular signal transduction, peptidyl-serine phosphorylation                                                                                                                                                                                                                                                                                                                                                                                                                                                        |                                                                                                                                           | -                                                                                                                                                                                                                                                                                                                                                                                           | (1.66)                   |
| <i>plcb3</i> | <i>PLCB3</i> | N/C  | cartilage morphogenesis, embryonic viscerocranium morphogenesis, inositol trisphosphate biosynthetic process, intracellular signal transduction, lipid catabolic process, negative regulation of Ca <sup>2+</sup> import, negative regulation of vascular permeability, phosphatidylinositol-mediated signaling, release of sequestered Ca <sup>2+</sup> into cytosol                                                                                                                                                     | Ca <sup>2+</sup> binding, calmodulin binding, hydrolase activity, phosphatidylinositol phospholipase C activity, protein binding          | aplastic branchiostegal ray 3, mislocalised cartilage elements, aplastic swim bladder, disrupted morphogenesis of embryonic viscerocranium, abnormal opercle shape, abnormal pharyngeal arch 3-7 skeleton and splanchnocranium, decreased amount of osteoblasts, abnormal ceratohyal-branchiostegal ray joint morphology, disrupted cartilage morphogenesis [149-152]                       | (9.09) [7,152]           |
| <i>plcg1</i> | <i>PLCG1</i> | PM   | angiogenesis, artery morphogenesis, fin regeneration, granulocyte differentiation, hematopoietic stem cell differentiation, inositol trisphosphate biosynthetic process, intracellular signal transduction, lipid catabolic process, phosphatidylinositol-mediated signaling, positive regulation of epithelial cell migration, regulation of angioblast cell migration involved in selective angioblast sprouting, regulation of heart contraction, release of sequestered Ca <sup>2+</sup> into cytosol, vasculogenesis | hydrolase activity, phosphatidylinositol phospholipase C activity                                                                         | disrupted angiogenesis, decreased amount of dorsal aorta angiogenic sprouts, edematous pericardium, disrupted granulocyte and myeloid leukocyte differentiation, sprouting angiogenesis arrested, disrupted vasculogenesis, arrested blood circulation, aplastic dorsal aorta and posterior cardinal vein, disrupted heart contraction, decreased eye and head size, curved trunk [153-159] | [157,160,161]<br>(60.46) |
| <i>plcg2</i> | <i>PLCG2</i> | PM   | inositol trisphosphate biosynthetic process, intracellular signal transduction, lipid catabolic process, phosphatidylinositol-mediated signaling, phospholipid catabolic process, release of sequestered Ca <sup>2+</sup> into cytosol                                                                                                                                                                                                                                                                                    | hydrolase activity, phosphatidylinositol phospholipase C activity                                                                         | -                                                                                                                                                                                                                                                                                                                                                                                           | (2.5)                    |
| <i>plch1</i> | <i>PLCH1</i> | PM/C | intracellular signal transduction, lipid catabolic process, phosphatidylinositol-mediated signaling                                                                                                                                                                                                                                                                                                                                                                                                                       | Ca <sup>2+</sup> binding, Ca <sup>2+</sup> -dependent phospholipase C activity, hydrolase activity, phosphoric diester hydrolase activity | -                                                                                                                                                                                                                                                                                                                                                                                           | (35.14)                  |



|                |               |            |                                                                                                                                                                                                        |                                                                                                                                                                       |                                                                                                                                                                                                                                                                     |                  |          |
|----------------|---------------|------------|--------------------------------------------------------------------------------------------------------------------------------------------------------------------------------------------------------|-----------------------------------------------------------------------------------------------------------------------------------------------------------------------|---------------------------------------------------------------------------------------------------------------------------------------------------------------------------------------------------------------------------------------------------------------------|------------------|----------|
| <i>plch2a</i>  | <i>PLCH2</i>  | PM         | inositol trisphosphate biosynthetic process, intracellular signal transduction, lipid catabolic process, phosphatidylinositol-mediated signaling, release of sequestered Ca <sup>2+</sup> into cytosol | Ca <sup>2+</sup> binding, hydrolase activity, phosphatidylinositol phospholipase C activity, phosphoric diester hydrolase activity                                    | -                                                                                                                                                                                                                                                                   | (103.25)         |          |
| <i>plcl1</i>   | <i>PLCL1</i>  | C          |                                                                                                                                                                                                        | GABA receptor binding, hydrolase activity, inositol 1,4,5 trisphosphate binding, phosphatidylinositol phospholipase C activity, phosphoric diester hydrolase activity | -                                                                                                                                                                                                                                                                   | (122.90)         | [162]    |
| <i>plcl2</i>   | <i>PLCL2</i>  | PM         | intracellular signal transduction, lipid catabolic process, regulation of synaptic transmission, GABAergic                                                                                             |                                                                                                                                                                       | -                                                                                                                                                                                                                                                                   | (36.18)          |          |
| <i>ppef1</i>   | <i>PPEF1</i>  | C          | detection of stimulus involved in sensory perception                                                                                                                                                   | Ca <sup>2+</sup> binding, hydrolase activity, iron ion binding, manganese ion binding, protein serine/threonine phosphatase activity                                  | -                                                                                                                                                                                                                                                                   | VERY LOW (30.71) | VERY LOW |
| <i>ppef2b</i>  | <i>PPEF1</i>  | C          | -                                                                                                                                                                                                      | -                                                                                                                                                                     | -                                                                                                                                                                                                                                                                   | (10.67)          |          |
| <i>ppp1cab</i> | <i>PPP1CA</i> | C/N        |                                                                                                                                                                                                        |                                                                                                                                                                       | edematous pericardium, disrupted blood circulation, disrupted migration of blood vessel endothelial cells, disrupted branching morphogenesis of an epithelial tube, distended hindbrain, decreased functionality of intersegmental vessel, edematous yolk [163,164] | (30.58)          |          |
| <i>ppp1cb</i>  | <i>PPP1CB</i> | C/N        | convergent extension involved in axis elongation, liver development                                                                                                                                    | hydrolase activity, metal ion binding, phosphoprotein phosphatase activity, protein serine/threonine phosphatase activity, protein heterodimerization activity        | whole organism anterior-posterior axis curved and decreased length, disrupted liver development [165,166]                                                                                                                                                           | (151.15)         | [166]    |
| <i>ppp1cbl</i> | <i>PPP1CB</i> | C/N        | circadian regulation of gene expression, convergent extension involved in axis elongation, regulation of circadian rhythm                                                                              |                                                                                                                                                                       |                                                                                                                                                                                                                                                                     | (55.66)          |          |
| <i>ppp1cc</i>  | <i>PPP1CC</i> | Mt/C/N     | angiogenesis                                                                                                                                                                                           | -                                                                                                                                                                     | blood circulation disrupted, blood vessel endothelial cell migration disrupted [163]                                                                                                                                                                                | (58.02)          |          |
| <i>prkcba</i>  | <i>PRKCB</i>  | PM/EM /C/N | intracellular signal transduction, peptidyl-serine phosphorylation, protein phosphorylation                                                                                                            | kinase activity, metal ion binding, protein kinase C activity, protein serine/threonine kinase activity, transferase activity, zinc ion binding                       | -                                                                                                                                                                                                                                                                   | (30.74)          | [7,167]  |

|               |              |         |                                                                                                                                                                                                                                                                                                                                                       |                                                                                                                                                                                                                                                                                                           |                                                                                                                                                                                                                        |                                  |
|---------------|--------------|---------|-------------------------------------------------------------------------------------------------------------------------------------------------------------------------------------------------------------------------------------------------------------------------------------------------------------------------------------------------------|-----------------------------------------------------------------------------------------------------------------------------------------------------------------------------------------------------------------------------------------------------------------------------------------------------------|------------------------------------------------------------------------------------------------------------------------------------------------------------------------------------------------------------------------|----------------------------------|
| <i>prkcbb</i> | <i>PRKCB</i> | PM/C/N  | B cell activation, B cell receptor signaling pathway, adaptive immune response, apoptotic process, blood coagulation, chromatin organization, embryonic hemopoiesis, intracellular signal transduction, peptidyl-serine phosphorylation, positive regulation of I-kappaB kinase/NF-kappaB signaling, regulation of transcription by RNA polymerase II | ATP binding, androgen receptor binding, chromatin binding, histone binding, histone kinase activity (H3-T6 specific), metal ion binding, nuclear receptor transcription coactivator activity, protein kinase C activity, protein serine/threonine kinase activity, transferase activity, zinc ion binding | decreased blood coagulation, fibrin clot formation, abnormal thrombocyte cellular adhesivity, disrupted embryonic hemopoiesis, decreased blood circulation, decreased eye size [168,169]                               | [167,170,171]<br><b>(221.76)</b> |
| <i>prkcda</i> | <i>PRKCD</i> | C/N     | apoptotic process, cell cycle, intracellular signal transduction, peptidyl-serine phosphorylation                                                                                                                                                                                                                                                     | ATP binding, kinase activity, metal ion binding, protein serine/threonine kinase activity, transferase activity                                                                                                                                                                                           | -                                                                                                                                                                                                                      | [7]<br><b>(73.10)</b>            |
| <i>prkcea</i> | <i>PRKCE</i> | PM/ER/C | intracellular signal transduction, peptidyl-serine phosphorylation                                                                                                                                                                                                                                                                                    |                                                                                                                                                                                                                                                                                                           | -                                                                                                                                                                                                                      | [170]<br><b>(141.31)</b>         |
| <i>prkceb</i> | <i>PRKCE</i> | PM/ER/C | glomerular filtration, glomerular visceral epithelial cell development, intracellular signal transduction, peptidyl-serine phosphorylation                                                                                                                                                                                                            |                                                                                                                                                                                                                                                                                                           | decreased life span, glomerular filtration disrupted, pericardium edematous, post-vent region curved, abnormal pronephric glomerulus podocytes foot morphology, decreased length, yolk syncytial layer edematous [172] | <b>(0.77)</b>                    |
| <i>prkcg</i>  | <i>PRKCG</i> | PM/C    | intracellular signal transduction, peptidyl-serine phosphorylation, receptor recycling, synapse maturation                                                                                                                                                                                                                                            | ATP binding, kinase activity, metal ion binding, protein serine/threonine kinase activity, transferase activity, zinc ion binding                                                                                                                                                                         | arrested hatching, disrupted mechanosensory behavior, disrupted synapse maturation [173]                                                                                                                               | [170,174]<br><b>(65.55)</b>      |
| <i>prkcha</i> | <i>PRKCH</i> | PM/EM/C | intracellular signal transduction, peptidyl-serine phosphorylation                                                                                                                                                                                                                                                                                    | ATP binding, metal ion binding, protein kinase C activity, protein serine/threonine kinase activity, transferase activity                                                                                                                                                                                 | -                                                                                                                                                                                                                      | <b>(0.92)</b>                    |
| <i>prkchb</i> | <i>PRKCH</i> | PM/EM/C |                                                                                                                                                                                                                                                                                                                                                       |                                                                                                                                                                                                                                                                                                           | -                                                                                                                                                                                                                      | <b>(0.57)</b>                    |

|              |               |          |                                                                                                                                                                                                                                                                                                                                                                                                                                                                                                                                                                     |                                                                                                                           |                                                                                                                                                                                                                                                                                                                                                                                                                                                                                                                                                                                                                                                                                                                                                                                                                                                                                                                                                                                       |                                         |
|--------------|---------------|----------|---------------------------------------------------------------------------------------------------------------------------------------------------------------------------------------------------------------------------------------------------------------------------------------------------------------------------------------------------------------------------------------------------------------------------------------------------------------------------------------------------------------------------------------------------------------------|---------------------------------------------------------------------------------------------------------------------------|---------------------------------------------------------------------------------------------------------------------------------------------------------------------------------------------------------------------------------------------------------------------------------------------------------------------------------------------------------------------------------------------------------------------------------------------------------------------------------------------------------------------------------------------------------------------------------------------------------------------------------------------------------------------------------------------------------------------------------------------------------------------------------------------------------------------------------------------------------------------------------------------------------------------------------------------------------------------------------------|-----------------------------------------|
| <i>prkci</i> | <i>PRKCI</i>  | EM/C/N   | adherens junction maintenance, brain development, cell projection assembly, cell-cell junction maintenance, digestive tract mesoderm development, dorsal motor nucleus of vagus nerve development, embryonic heart tube development, establishment of mitotic spindle orientation, establishment or maintenance of polarity of embryonic epithelium, generation of neurons, heart development, intracellular signal transduction, mesodermal cell migration, multicellular organism development, neural tube formation, neuroblast proliferation, nuclear migration | ATP binding, metal ion binding, protein kinase C activity, protein serine/threonine kinase activity, transferase activity | abnormal peridermal cell actin-based cell projections, abnormal glomerular visceral epithelial cell migration, mislocalised pronephric podocytes, malformed pronephric proximal convoluted tubule, abnormal photoreceptor cell morphogenesis, abnormal spinal cord glia cells, increased size of central canal, abnormal ceratobranchial 5 bone, disrupted development of dorsal motor nucleus of vagus nerve, disrupted maintenance of epithelial cells apical/basal polarity, neuroepithelial cell cell-cell junction broken, abnormal cornea structure, disrupted brain development, cardiac ventricle and atrium dilated, disrupted heart morphogenesis, abnormal liver morphology, disrupted development of neuroblasts, abnormal pigmented epithelial cells shape, abnormal mitotic cell cycle, abnormal retina structure, decreased eye size, edematous pericardium, disrupted eye pigmentation, delayed melanocyte differentiation, disrupted blood circulation [153,175-185] | [176,178,180,186-190]<br><b>(73.75)</b> |
| <i>prkcq</i> | <i>PRKCQ</i>  | PM/C     | intracellular signal transduction, peptidyl-serine phosphorylation                                                                                                                                                                                                                                                                                                                                                                                                                                                                                                  |                                                                                                                           | -                                                                                                                                                                                                                                                                                                                                                                                                                                                                                                                                                                                                                                                                                                                                                                                                                                                                                                                                                                                     | [170]<br><b>(9.24)</b>                  |
| <i>prkcz</i> | <i>PRK CZ</i> | PM/EM /C | dermal bone morphogenesis, generation of neurons, intracellular signal transduction, nuclear migration, peptidyl-serine phosphorylation, photoreceptor cell outer segment organization, pronephric nephron tubule epithelial cell differentiation, regulation of cell migration involved in sprouting angiogenesis, retina morphogenesis in camera-type eye                                                                                                                                                                                                         |                                                                                                                           | caudal fin principal ray deformed, abnormal mouth position, abnormal scale spatial pattern, dorsal longitudinal anastomotic vessel aplastic, intersegmental vessel malformed [110,191]                                                                                                                                                                                                                                                                                                                                                                                                                                                                                                                                                                                                                                                                                                                                                                                                | [170,176,192-195]<br><b>(20.34)</b>     |

|               |              |             |                                                                                                                                                                                                                                                                                                                                                                           |                                                          |                                                                                                                                                                                                                                                                                                                                                                                                                                                                                                                                                                                                      |                             |
|---------------|--------------|-------------|---------------------------------------------------------------------------------------------------------------------------------------------------------------------------------------------------------------------------------------------------------------------------------------------------------------------------------------------------------------------------|----------------------------------------------------------|------------------------------------------------------------------------------------------------------------------------------------------------------------------------------------------------------------------------------------------------------------------------------------------------------------------------------------------------------------------------------------------------------------------------------------------------------------------------------------------------------------------------------------------------------------------------------------------------------|-----------------------------|
| <i>psen1</i>  | <i>PSEN1</i> | G/ER/<br>PM | Notch signaling pathway, amyloid-beta formation, brain development, canonical Wnt signaling pathway, lymphangiogenesis, melanocyte differentiation, membrane protein ectodomain proteolysis, optomotor response, positive regulation of catalytic activity, proteolysis, regulation of endopeptidase activity, response to hypoxia, somite development, swimming behavior | aspartic-type endopeptidase activity, hydrolase activity | abnormal blood accumulation pharyngeal arch 3-7, brain edematous, disrupted brain development, fourth and tectal ventricle increased size, hydrocephalic hindbrain and midbrain, abnormal eye morphology, edematous pericardium, abnormal post-vent morphology, abnormal optomotor response, decreased expression of <i>baxa</i> and increase expression of <i>neurog1</i> , decreased swimming distance, canonical Wnt and Notch signaling pathway disrupted, lymphangiogenesis disrupted, thoracic duct absent, decreased amount of melanocytes, neural crest cell development disrupted [196-199] | [17,200]<br><b>(28.14)</b>  |
| <i>psen2</i>  | <i>PSEN2</i> | G/ER/<br>PM | Notch receptor processing, Notch signaling pathway, amyloid-beta formation, brain development, Ca <sup>2+</sup> transport, melanocyte differentiation, membrane protein ectodomain proteolysis, neurogenesis, protein processing, proteolysis, somite development                                                                                                         |                                                          | increased size of fourth and tectal ventricles, hydrocephalic hindbrain and midbrain, decreased amount of melanocytes, decreased amount of neural crest cells [201]                                                                                                                                                                                                                                                                                                                                                                                                                                  | [202-205]<br><b>(14.82)</b> |
| <i>pvalb1</i> | -            | C           | regulation of cytosolic Ca <sup>2+</sup> concentration                                                                                                                                                                                                                                                                                                                    | Ca <sup>2+</sup> binding                                 | -                                                                                                                                                                                                                                                                                                                                                                                                                                                                                                                                                                                                    | [6]<br><b>(1.09)</b>        |
| <i>pvalb4</i> | -            | C           |                                                                                                                                                                                                                                                                                                                                                                           |                                                          | -                                                                                                                                                                                                                                                                                                                                                                                                                                                                                                                                                                                                    | <b>(0.24)</b>               |
| <i>pvalb5</i> | -            | C/N         | -                                                                                                                                                                                                                                                                                                                                                                         |                                                          | [7,206]<br><b>(0.17)</b>                                                                                                                                                                                                                                                                                                                                                                                                                                                                                                                                                                             |                             |
| <i>pvalb7</i> | <i>PVALB</i> | C           | -                                                                                                                                                                                                                                                                                                                                                                         |                                                          | [7,21,56,207,208]<br><b>(7.39)</b>                                                                                                                                                                                                                                                                                                                                                                                                                                                                                                                                                                   |                             |
| <i>pvalb8</i> | -            | C           | -                                                                                                                                                                                                                                                                                                                                                                         |                                                          | [7,209,210]<br><b>(2.58)</b>                                                                                                                                                                                                                                                                                                                                                                                                                                                                                                                                                                         |                             |
| <i>rcn1</i>   | <i>RCN1</i>  | ER          | -                                                                                                                                                                                                                                                                                                                                                                         |                                                          | [7]<br><b>(13.74)</b>                                                                                                                                                                                                                                                                                                                                                                                                                                                                                                                                                                                |                             |
| <i>reps1</i>  | <i>REPS1</i> | PM/C        | receptor-mediated endocytosis                                                                                                                                                                                                                                                                                                                                             |                                                          | -                                                                                                                                                                                                                                                                                                                                                                                                                                                                                                                                                                                                    | <b>(38.37)</b>              |
| <i>reps2</i>  | <i>REPS2</i> | PM/C        | -                                                                                                                                                                                                                                                                                                                                                                         |                                                          | -                                                                                                                                                                                                                                                                                                                                                                                                                                                                                                                                                                                                    | [211]<br><b>(10.36)</b>     |

|                 |                |    |                                                                                                                                                                                                                                                         |                                                                                                                                                                                                          |                                                                                                                                                                                                                                                                                                                                                   |                         |
|-----------------|----------------|----|---------------------------------------------------------------------------------------------------------------------------------------------------------------------------------------------------------------------------------------------------------|----------------------------------------------------------------------------------------------------------------------------------------------------------------------------------------------------------|---------------------------------------------------------------------------------------------------------------------------------------------------------------------------------------------------------------------------------------------------------------------------------------------------------------------------------------------------|-------------------------|
| <i>ryr1a</i>    | <i>RYR1</i>    | ER | Ca <sup>2+</sup> transmembrane transport, cellular Ca <sup>2+</sup> homeostasis, release of sequestered Ca <sup>2+</sup> into cytosol                                                                                                                   |                                                                                                                                                                                                          | decreased amount of slow muscle cells [212]                                                                                                                                                                                                                                                                                                       | [129,213,214]<br>(1.89) |
| <i>ryr1b</i>    | <i>RYR1</i>    | ER | Ca <sup>2+</sup> transmembrane transport, cellular Ca <sup>2+</sup> homeostasis, cellular response to oxidative stress, fast-twitch skeletal muscle fiber contraction, larval locomotory behavior, release of sequestered Ca <sup>2+</sup> into cytosol | Ca <sup>2+</sup> channel activity, Ca <sup>2+</sup> binding, Ca <sup>2+</sup> -induced Ca <sup>2+</sup> release activity, protein binding, ryanodine-sensitive Ca <sup>2+</sup> release channel activity | increased protein oxidation, decreased larval locomotory behavior, swollen skeletal muscle longitudinal sarcoplasmic reticulum, disorganized skeletal muscle myofibril, abnormal fast-twitch skeletal muscle fiber contraction, decreased intensity of muscle contraction, decreased activity of voltage-gated Ca <sup>2+</sup> channel [215-218] | [214,217]<br>(165.49)   |
| <i>ryr2a</i>    | <i>RYR2</i>    | ER | Ca <sup>2+</sup> transport                                                                                                                                                                                                                              | Ca <sup>2+</sup> binding                                                                                                                                                                                 | -                                                                                                                                                                                                                                                                                                                                                 | [214]<br>(308.43)       |
| <i>ryr2b</i>    | <i>RYR2</i>    | ER |                                                                                                                                                                                                                                                         | Ca <sup>2+</sup> channel activity, Ca <sup>2+</sup> binding, Ca <sup>2+</sup> -induced Ca <sup>2+</sup> release, ryanodine-sensitive Ca <sup>2+</sup> -release channel activity                          | -                                                                                                                                                                                                                                                                                                                                                 | [204,214]<br>(0.05)     |
| <i>ryr3</i>     | <i>RYR3</i>    | ER | Ca <sup>2+</sup> transmembrane transport, cellular Ca <sup>2+</sup> homeostasis, release of sequestered Ca <sup>2+</sup> into cytosol                                                                                                                   | Ca <sup>2+</sup> channel activity, Ca <sup>2+</sup> binding, protein binding, Ca <sup>2+</sup> -induced Ca <sup>2+</sup> release, ryanodine-sensitive Ca <sup>2+</sup> -release channel activity         | decreased amount of slow muscle cells, disrupted determination of left/right asymmetry in lateral mesoderm, decreased activity of calmodulin-dependent protein kinase [212,219]                                                                                                                                                                   | [6,214,220]<br>(71.83)  |
| <i>s100a1</i>   | <i>S100A1</i>  | C  | regulation of heart contraction                                                                                                                                                                                                                         | Ca <sup>2+</sup> binding                                                                                                                                                                                 | -                                                                                                                                                                                                                                                                                                                                                 | [221,222]<br>(0.51)     |
| <i>s100a10b</i> | <i>S100A10</i> | C  | regulation of cell proliferation                                                                                                                                                                                                                        | Ca <sup>2+</sup> binding, Ca <sup>2+</sup> -dependent protein binding                                                                                                                                    | -                                                                                                                                                                                                                                                                                                                                                 | [7,222]<br>(11.33)      |
| <i>s100a11</i>  | <i>S100A11</i> | C  | -                                                                                                                                                                                                                                                       | Ca <sup>2+</sup> binding, transition metal ion binding                                                                                                                                                   | -                                                                                                                                                                                                                                                                                                                                                 | [222]<br>(0.6)          |
| <i>s100b</i>    | <i>S100B</i>   | C  | -                                                                                                                                                                                                                                                       | Ca <sup>2+</sup> binding, zinc ion binding                                                                                                                                                               | -                                                                                                                                                                                                                                                                                                                                                 | [17,222]<br>(86.99)     |
| <i>s100s</i>    | -              | C  | -                                                                                                                                                                                                                                                       | Ca <sup>2+</sup> binding, transition metal ion binding                                                                                                                                                   | -                                                                                                                                                                                                                                                                                                                                                 | [222]<br>(1.11)         |
| <i>s100t</i>    | -              | C  | -                                                                                                                                                                                                                                                       |                                                                                                                                                                                                          | -                                                                                                                                                                                                                                                                                                                                                 | [7,222]<br>(0.06)       |
| <i>s100u</i>    | -              | C  | -                                                                                                                                                                                                                                                       | Ca <sup>2+</sup> binding, copper ion binding                                                                                                                                                             | -                                                                                                                                                                                                                                                                                                                                                 | (4.59)                  |
| <i>s100v2</i>   | -              | C  | -                                                                                                                                                                                                                                                       |                                                                                                                                                                                                          | -                                                                                                                                                                                                                                                                                                                                                 | [17]<br>(8.58)          |
| <i>s100w</i>    | <i>S100W</i>   | C  | regulation of cell proliferation                                                                                                                                                                                                                        | Ca <sup>2+</sup> binding, Ca <sup>2+</sup> -dependent protein binding                                                                                                                                    | -                                                                                                                                                                                                                                                                                                                                                 | (0.1)                   |
| <i>s100z</i>    | <i>S100Z</i>   | C  | -                                                                                                                                                                                                                                                       | Ca <sup>2+</sup> binding                                                                                                                                                                                 | -                                                                                                                                                                                                                                                                                                                                                 | [7,222]<br>(4.09)       |

|                 |                |           |                                                                                                                                                                    |                                                                                                                   |                                                                                         |                       |          |
|-----------------|----------------|-----------|--------------------------------------------------------------------------------------------------------------------------------------------------------------------|-------------------------------------------------------------------------------------------------------------------|-----------------------------------------------------------------------------------------|-----------------------|----------|
| <i>saraf</i>    | <i>SARAF</i>   | ER        | Ca <sup>2+</sup> transport, regulation of store-operated Ca <sup>2+</sup> entry                                                                                    | -                                                                                                                 | -                                                                                       | VERY LOW (12.61)      | MEDIUM   |
| <i>scgn</i>     | <i>SCGN</i>    | C         | brain development, regulation of long-term, synaptic potentiation, regulation of presynaptic cytosolic Ca <sup>2+</sup> concentration                              | Ca <sup>2+</sup> binding                                                                                          | brain decreased size and edematous, pericardium edematous [223]                         | VERY LOW (0.05)       | VERY LOW |
| <i>sgca</i>     | <i>SGCA</i>    | PM        | -                                                                                                                                                                  |                                                                                                                   | -                                                                                       | [7] (1.15)            |          |
| <i>sgcb</i>     | <i>SGCB</i>    | PM        | -                                                                                                                                                                  |                                                                                                                   | -                                                                                       | [224] (68.52)         |          |
| <i>sgcd</i>     | <i>SGCD</i>    | PM        | cardiac muscle tissue development, determination of left/right symmetry, heart contraction, somatic muscle development, swim bladder inflation                     | -                                                                                                                 | disrupted blood circulation, decreased heart concractility, edematous pericardium [225] | [204,225-227] (11.57) |          |
| <i>sgce</i>     | <i>SGCE</i>    | PM        | -                                                                                                                                                                  | Ca <sup>2+</sup> binding                                                                                          | -                                                                                       | [7] (90.98)           |          |
| <i>sgcg</i>     | <i>SGCG</i>    | PM        | cardiac muscle tissue development, heart contraction                                                                                                               | -                                                                                                                 | -                                                                                       | [7,226,228] (0.27)    |          |
| <i>sgcz</i>     | <i>SGCZ</i>    | PM        | -                                                                                                                                                                  | -                                                                                                                 | -                                                                                       | (5.62)                |          |
| <i>sgk1</i>     | <i>SGK1</i>    | C/ER/N    | apoptotic process, inflammatory response, intracellular signal transduction, peptidyl-serine phosphorylation                                                       | ATP binding, potassium channel regulator activity, protein serine/threonine kinase activity, transferase activity | -                                                                                       | [1,7,229,230] (22.38) |          |
| <i>sgk2a</i>    | <i>SGK2</i>    | N/C       |                                                                                                                                                                    |                                                                                                                   | -                                                                                       | [211] (1.24)          |          |
| <i>sgk2b</i>    | <i>SGK2</i>    | N/C       |                                                                                                                                                                    |                                                                                                                   | -                                                                                       | (1.5)                 |          |
| <i>sgk3</i>     | <i>SGK3</i>    | C         |                                                                                                                                                                    |                                                                                                                   | -                                                                                       | (17.12)               |          |
| <i>sigmar1</i>  | <i>SIGMAR1</i> | ER/PM/N/C | lipid transport, response to wounding                                                                                                                              | -                                                                                                                 | -                                                                                       | LOW (17.2)            | LOW      |
| <i>slc24a1</i>  | <i>SLC24A1</i> | PM        | Ca <sup>2+</sup> transmembrane transport, cellular Ca <sup>2+</sup> homeostasis, long-term synaptic depression, long-term synaptic potentiation                    | Ca <sup>2+</sup> channel activity, Ca <sup>2+</sup> , potassium:sodium antiporter activity                        | -                                                                                       | VERY LOW (0.75)       | VERY LOW |
| <i>slc24a2</i>  | <i>SLC24A2</i> | PM        | Ca <sup>2+</sup> transmembrane transport, cellular Ca <sup>2+</sup> homeostasis, long-term synaptic depression, long-term synaptic potentiation, visual perception |                                                                                                                   | -                                                                                       | (5.03)                |          |
| <i>slc24a3</i>  | <i>SLC24A3</i> | PM        | Ca <sup>2+</sup> transmembrane transport, cellular Ca <sup>2+</sup> homeostasis                                                                                    |                                                                                                                   | -                                                                                       | MEDIUM (61.86)        | MEDIUM   |
| <i>slc24a4a</i> | <i>SLC24A4</i> | PM        |                                                                                                                                                                    |                                                                                                                   | -                                                                                       | [7] LOW (16.8) LOW    |          |
| <i>slc24a4b</i> | <i>SLC24A4</i> | PM        |                                                                                                                                                                    |                                                                                                                   | -                                                                                       | LOW (13.48) LOW       |          |
|                 |                |           |                                                                                                                                                                    |                                                                                                                   | -                                                                                       |                       |          |

|                  |                 |    |                                                                                                                                         |                                                                                                                                                                       |                                                                                                                                                       |                  |      |
|------------------|-----------------|----|-----------------------------------------------------------------------------------------------------------------------------------------|-----------------------------------------------------------------------------------------------------------------------------------------------------------------------|-------------------------------------------------------------------------------------------------------------------------------------------------------|------------------|------|
| <i>slc24a5</i>   | <i>SLC24A5</i>  | PM | developmental pigmentation, ion transport, melanocyte differentiation, melanocyte migration, regulation of melanin biosynthetic process | Ca <sup>2+</sup> channel activity, Ca <sup>2+</sup> , potassium:sodium antiporter activity                                                                            | decreased pigmentation [231]                                                                                                                          | [232]<br>(0.42)  |      |
| <i>slc25a12</i>  | <i>SLC25A12</i> | Mt | L-glutamate transmembrane transport, aspartate transmembrane transport, malate-aspartate shuttle                                        | L-aspartate transmembrane transporter activity, L-glutamate transmembrane transporter activity, Ca <sup>2+</sup> binding                                              | -                                                                                                                                                     | [1]<br>(66.76)   |      |
| <i>slc25a19</i>  | <i>SLC25A19</i> | PM | thiamine pyrophosphate transmembrane transport                                                                                          | thiamine transmembrane transporter activity                                                                                                                           | -                                                                                                                                                     | (4.91)           |      |
| <i>slc25a23a</i> | <i>SLC25A23</i> | PM | transmembrane transport                                                                                                                 | ATP transmembrane transporter activity, Ca <sup>2+</sup> binding                                                                                                      | -                                                                                                                                                     | (33.0)           |      |
| <i>slc25a23b</i> | <i>SLC25A23</i> | PM |                                                                                                                                         |                                                                                                                                                                       | -                                                                                                                                                     | (16.76)          |      |
| <i>slc25a24</i>  | <i>SLC25A24</i> | Mt | cellular response to Ca <sup>2+</sup> , cellular response to oxidative stress, mitochondrial transport, regulation of cell death        |                                                                                                                                                                       | -                                                                                                                                                     | [7]<br>(4.97)    |      |
| <i>slc25a24l</i> | <i>SLC25A25</i> | Mt | transmembrane transport                                                                                                                 |                                                                                                                                                                       | eye decreased size, gut and liver hypoplastic, head circular and decreased size, mandibular arch skeleton decreased size, edematous pericardium [153] | (3.44)           |      |
| <i>slc25a25a</i> | <i>SLC25A25</i> | Mt |                                                                                                                                         | -                                                                                                                                                                     | [111]<br>(3.99)                                                                                                                                       |                  |      |
| <i>slc25a25b</i> | <i>SLC25A25</i> | Mt |                                                                                                                                         | Ca <sup>2+</sup> binding, transmembrane transporter activity                                                                                                          | -                                                                                                                                                     | (4.17)           |      |
| <i>slc25a28</i>  | <i>SLC25A28</i> | Mt | ion transport, iron import into the mitochondrion, iron ion homeostasis                                                                 | iron ion transmembrane transporter activity                                                                                                                           | -                                                                                                                                                     | HIGH (0.05)      | HIGH |
| <i>slc25a37</i>  | <i>SLC25A37</i> | Mt | embryonic hemopoiesis, erythrocyte development, iron import into the mitochondrion, iron ion homeostasis                                |                                                                                                                                                                       | decreased amount of erythroid lineage cells, intestinal epithelium hyperplastic [233-235]                                                             | [235]<br>(1.19)  |      |
| <i>slc25a39</i>  | <i>SLC25A39</i> | Mt | heme biosynthetic process, manganese ion transport, transmembrane transport                                                             | metallochaperone activity, transmembrane transporter activity                                                                                                         | disrupted heme biosynthetic process, decreased amount of nucleate erythrocytes, abnormal nucleate erythrocyte hemoglobin complex composition [236]    | [236]<br>(20.97) |      |
| <i>slc25a42</i>  | <i>SLC25A42</i> | Mt | mitochondrial membrane organization, transmembrane transport                                                                            | ADP transmembrane transporter activity, AMP transmembrane transporter activity, ATP transmembrane transporter activity, coenzyme A transmembrane transporter activity | disrupted hatching, curved trunk, swollen skeletal muscle mitochondrial membrane [237]                                                                | (7.41)           |      |

|                 |                 |    |                                                                                                                                                                                                                                                              |                                                        |                                                                                                                                                                                                                                                                                  |                              |        |
|-----------------|-----------------|----|--------------------------------------------------------------------------------------------------------------------------------------------------------------------------------------------------------------------------------------------------------------|--------------------------------------------------------|----------------------------------------------------------------------------------------------------------------------------------------------------------------------------------------------------------------------------------------------------------------------------------|------------------------------|--------|
| <i>slc25a43</i> | <i>SLC25A43</i> | Mt | transmembrane transport                                                                                                                                                                                                                                      | transmembrane transporter activity                     | -                                                                                                                                                                                                                                                                                | (7.07)                       |        |
| <i>slc8a1a</i>  | <i>SLC8A1</i>   | PM | Ca <sup>2+</sup> transport, cell communication, cellular Ca <sup>2+</sup> homeostasis, regulation of heart contraction, sarcomere organization                                                                                                               | Ca <sup>2+</sup> :sodium antiporter activity           | abnormal atrium morphology, abnormal cardiac muscle cells shape and length, cardiac muscle cell myofibrils disorganized, heart trim63a expression increased, heart contraction asynchronous and decreased rate [127,238]                                                         | [20,204,239]<br>(14.88)      |        |
| <i>slc8a1b</i>  | <i>SLC8A1</i>   | PM | Ca <sup>2+</sup> transport, cell communication, transmembrane transport                                                                                                                                                                                      |                                                        | -                                                                                                                                                                                                                                                                                | [25,240]<br>(6.81)           |        |
| <i>slc8a2a</i>  | <i>SLC8A2</i>   | PM |                                                                                                                                                                                                                                                              |                                                        | -                                                                                                                                                                                                                                                                                | [25]<br>VERY LOW    VERY LOW |        |
| <i>slc8a2b</i>  | <i>SLC8A2</i>   | PM |                                                                                                                                                                                                                                                              |                                                        | -                                                                                                                                                                                                                                                                                | [25]<br>(50.67)              |        |
| <i>slc8a3</i>   | <i>SLC8A3</i>   | PM |                                                                                                                                                                                                                                                              | Ca <sup>2+</sup> :sodium antiporter activity           | -                                                                                                                                                                                                                                                                                | [25]<br>(18.6)               |        |
| <i>slc8a4a</i>  | -               | PM | Ca <sup>2+</sup> transport, cell communication, determination of left/right symmetry, fluid transport, heart contraction, heart looping, regulation of cytosolic Ca <sup>2+</sup> concentration, skeletal muscle tissue development, transmembrane transport |                                                        | decrease rate of heart contraction, edematous pericardium, abnormal mechanosensory behavior, disrupted determination of left/right symmetry, disrupted development of digestive truck, heart tube and liver, abnormal Kupffer's vesicle cilium movement [241,242]                | [25,243]<br>(73.66)          |        |
| <i>slc8a4b</i>  | -               | PM | Ca <sup>2+</sup> transport, cell communication, transmembrane transport                                                                                                                                                                                      |                                                        | -                                                                                                                                                                                                                                                                                | [25]<br>(19.66)              |        |
| <i>slc8b1</i>   | <i>SLC8B1</i>   | PM | transmembrane transport                                                                                                                                                                                                                                      | -                                                      | -                                                                                                                                                                                                                                                                                | (2.1)                        |        |
| <i>smdt1b</i>   | <i>SMDT1</i>    | Mt | Ca <sup>2+</sup> import into the mitochondrion, mitochondrial Ca <sup>2+</sup> homeostasis                                                                                                                                                                   | -                                                      | -                                                                                                                                                                                                                                                                                | MEDIUM<br>(13.29)            | MEDIUM |
| <i>smoc1</i>    | <i>SMOC1</i>    | EM | eye development, optic cup morphogenesis involved in camera-type eye development                                                                                                                                                                             | Ca <sup>2+</sup> binding, extracellular matrix binding | decreased eye size, optic fissure open, immature retina, abnormal forebrain morphology [244]                                                                                                                                                                                     | [244]<br>(0.9)               |        |
| <i>smoc2</i>    | <i>SMOC2</i>    | EM | embryonic viscerocranium morphogenesis, myeloid cell development, odontogenesis, regulation of BMP signaling pathway                                                                                                                                         | Ca <sup>2+</sup> binding                               | decreased signaling via BMP pathway, abnormal blood circulation, curved caudal fin, abnormal somites shape, abnormal hemopoiesis process and myeloid cells development, abnormal cartilage morphology, absent eyes, decreased head size, disrupted bone mineralization [245-247] | [1,245-247]<br>(14.05)       |        |
| <i>srl</i>      | <i>SRL</i>      | ER | -                                                                                                                                                                                                                                                            | GTP binding                                            | -                                                                                                                                                                                                                                                                                | [7,18,248]<br>(0.87)         |        |
| <i>ssr1</i>     | <i>SSR1</i>     | ER | cellular response to estrogen stimulus                                                                                                                                                                                                                       | -                                                      | -                                                                                                                                                                                                                                                                                | [1,249,250]<br>(40.77)       |        |



|               |               |     |                                                                                                                                                                                                                                                                                                                                                                                                                                                                                                                                                                                                                                                     |                                                                             |                                                                                                                                                                                                                                                                                                                                                                                                                                                                                                                                                                                                                                                                                                                                                                                                                                                                                                                                                                                                                                                                                                                                                                                                                                                                         |                       |
|---------------|---------------|-----|-----------------------------------------------------------------------------------------------------------------------------------------------------------------------------------------------------------------------------------------------------------------------------------------------------------------------------------------------------------------------------------------------------------------------------------------------------------------------------------------------------------------------------------------------------------------------------------------------------------------------------------------------------|-----------------------------------------------------------------------------|-------------------------------------------------------------------------------------------------------------------------------------------------------------------------------------------------------------------------------------------------------------------------------------------------------------------------------------------------------------------------------------------------------------------------------------------------------------------------------------------------------------------------------------------------------------------------------------------------------------------------------------------------------------------------------------------------------------------------------------------------------------------------------------------------------------------------------------------------------------------------------------------------------------------------------------------------------------------------------------------------------------------------------------------------------------------------------------------------------------------------------------------------------------------------------------------------------------------------------------------------------------------------|-----------------------|
| <i>stim1a</i> | <i>STIM1</i>  | ER  | activation of store-operated Ca <sup>2+</sup> channel activity, cellular Ca <sup>2+</sup> homeostasis, regulation of Ca <sup>2+</sup> transport, store-operated Ca <sup>2+</sup> entry                                                                                                                                                                                                                                                                                                                                                                                                                                                              | Ca <sup>2+</sup> channel regulator activity, Ca <sup>2+</sup> binding       | -                                                                                                                                                                                                                                                                                                                                                                                                                                                                                                                                                                                                                                                                                                                                                                                                                                                                                                                                                                                                                                                                                                                                                                                                                                                                       | (106.68)              |
| <i>stim1b</i> | <i>STIM1</i>  | ER  |                                                                                                                                                                                                                                                                                                                                                                                                                                                                                                                                                                                                                                                     |                                                                             | -                                                                                                                                                                                                                                                                                                                                                                                                                                                                                                                                                                                                                                                                                                                                                                                                                                                                                                                                                                                                                                                                                                                                                                                                                                                                       | (1.85)                |
| <i>stim2a</i> | <i>STIM2</i>  | ER  | -                                                                                                                                                                                                                                                                                                                                                                                                                                                                                                                                                                                                                                                   | Ca <sup>2+</sup> channel regulator activity                                 | -                                                                                                                                                                                                                                                                                                                                                                                                                                                                                                                                                                                                                                                                                                                                                                                                                                                                                                                                                                                                                                                                                                                                                                                                                                                                       | (0.14)                |
| <i>stim2b</i> | <i>STIM2</i>  | ER  | activation of store-operated Ca <sup>2+</sup> channel activity, cellular Ca <sup>2+</sup> homeostasis, regulation of Ca <sup>2+</sup> transport, store-operated Ca <sup>2+</sup> entry                                                                                                                                                                                                                                                                                                                                                                                                                                                              | Ca <sup>2+</sup> channel regulator activity, Ca <sup>2+</sup> binding       | -                                                                                                                                                                                                                                                                                                                                                                                                                                                                                                                                                                                                                                                                                                                                                                                                                                                                                                                                                                                                                                                                                                                                                                                                                                                                       | (2.68)                |
| <i>stk32a</i> | <i>STK32</i>  | N/C | intracellular signal transduction, peptidyl-serine phosphorylation                                                                                                                                                                                                                                                                                                                                                                                                                                                                                                                                                                                  | ATP binding, protein serine/threonine kinase activity, transferase activity | -                                                                                                                                                                                                                                                                                                                                                                                                                                                                                                                                                                                                                                                                                                                                                                                                                                                                                                                                                                                                                                                                                                                                                                                                                                                                       | (5.4)                 |
| <i>stk38a</i> | <i>STK38</i>  | N/C |                                                                                                                                                                                                                                                                                                                                                                                                                                                                                                                                                                                                                                                     |                                                                             | -                                                                                                                                                                                                                                                                                                                                                                                                                                                                                                                                                                                                                                                                                                                                                                                                                                                                                                                                                                                                                                                                                                                                                                                                                                                                       | (6.05)                |
| <i>stk38b</i> | <i>STK38</i>  | N/C |                                                                                                                                                                                                                                                                                                                                                                                                                                                                                                                                                                                                                                                     |                                                                             | -                                                                                                                                                                                                                                                                                                                                                                                                                                                                                                                                                                                                                                                                                                                                                                                                                                                                                                                                                                                                                                                                                                                                                                                                                                                                       | (1.23)                |
| <i>stk38l</i> | <i>STK38L</i> | C   |                                                                                                                                                                                                                                                                                                                                                                                                                                                                                                                                                                                                                                                     |                                                                             | -                                                                                                                                                                                                                                                                                                                                                                                                                                                                                                                                                                                                                                                                                                                                                                                                                                                                                                                                                                                                                                                                                                                                                                                                                                                                       | [7]<br>(35.95)        |
| <i>tdgf1</i>  | <i>TDGF1</i>  | EM  | BMP signaling pathway, adrenal gland development, anterior/posterior pattern specification, brain morphogenesis, cardioblast migration to the midline involved in heart field formation, central nervous system development, convergent extension involved in gastrulation, convergent extension involved in nephron morphogenesis, determination of left/right symmetry, digestive tract development, dorsal/ventral pattern formation, ectoderm and endoderm development, floor plate formation, forebrain development, germ cell migration, heart development, hypoblast development, hypothalamus development, induction of positive chemotaxis | activin receptor binding, nodal binding                                     | <i>eaf2</i> expression decreased, presumptive endoderm and hypoblast <i>sox32</i> expression absent, margin <i>lft1</i> expression absent, <i>tbxta</i> and <i>aldh1a2</i> expression decreased, germ ring and margin dorsal region <i>fscn1a</i> expression absent, axial hypoblast and shield <i>gsc</i> expression and forerunner cell group <i>rbp7a</i> expression absent, midbrain posterior region <i>rbp7a</i> expression increased, neuroectoderm anterior region <i>sox2</i> expression decreased, neuroectoderm posterior region <i>hoxb1b</i> expression decreased, abnormal mesendoderm development, decreased nodal signaling pathway, epiboly decreased duration, eyes fused, abnormal mesoderm and prechordal plate morphology, whole organism altered number of cells, abnormal neural tube closure and pineal complex shape, abnormal neural tube morphology, abnormal neural plate morphogenesis, germ ring poorly differentiated, pronephric glomerulus morphogenesis abnormal, abnormal cardioblast migration, dorsal/ventral pattern formation disrupted, cell-cell adhesion involved in mesendodermal cell migration disrupted, forebrain development disrupted, endoderm formation disrupted, abnormal endocrine pancreas development [251-266] | [1,267-269]<br>(0.05) |

|                |               |        |                                                                                                                                                                                                                                                                                                                                                                              |                                                                                                                            |                                                                                                                                                                                                                                                                    |                               |        |
|----------------|---------------|--------|------------------------------------------------------------------------------------------------------------------------------------------------------------------------------------------------------------------------------------------------------------------------------------------------------------------------------------------------------------------------------|----------------------------------------------------------------------------------------------------------------------------|--------------------------------------------------------------------------------------------------------------------------------------------------------------------------------------------------------------------------------------------------------------------|-------------------------------|--------|
| <i>tenm1</i>   | <i>TENM1</i>  | PM/N   | heterophilic cell-cell adhesion via plasma membrane cell adhesion molecules, neuron development, signal transduction                                                                                                                                                                                                                                                         |                                                                                                                            | -                                                                                                                                                                                                                                                                  | MEDIUM (191.97)               | MEDIUM |
| <i>tenm3</i>   | <i>TENM3</i>  | PM/N   | cell adhesion, cell differentiation, dendrite guidance, heterophilic cell-cell adhesion via plasma membrane cell adhesion molecules, homophilic cell adhesion via plasma membrane adhesion molecules, neuron development, positive regulation of neuron projection development, retinal ganglion cell axon guidance, signal transduction, visual perception                  | cell adhesion molecule binding, protein heterodimerization activity, protein homodimerization activity                     | mislocalised retinal ganglion cell dendrites, abnormal pigment accumulation [270]                                                                                                                                                                                  | [1,60,271,272]                |        |
|                |               |        |                                                                                                                                                                                                                                                                                                                                                                              |                                                                                                                            |                                                                                                                                                                                                                                                                    | LOW (217.92)                  | LOW    |
| <i>tenm4</i>   | <i>TENM4</i>  | C/PM/N | axon guidance, cell differentiation, central nervous system myelin formation, cell-cell adhesion via plasma membrane cell adhesion molecules, multicellular organism development, neuron development, positive regulation of gastrulation, positive regulation of neuron projection development, positive regulation of oligodendrocyte differentiation, signal transduction | catalytic activity, cell adhesion molecule binding, protein heterodimerization activity, protein homodimerization activity | axon guidance disrupted, abnormal motor neuron axon branchiness, peripheral nervous system axonogenesis involved in innervation disrupted [273]                                                                                                                    | [271]<br>(95.52)              |        |
| <i>thbd</i>    | <i>THBD</i>   | PM     | -                                                                                                                                                                                                                                                                                                                                                                            | Ca <sup>2+</sup> binding, transmembrane signaling receptor activity                                                        | -                                                                                                                                                                                                                                                                  | (1.85)                        |        |
| <i>tmbim1a</i> | <i>TMBIM1</i> | PM     | -                                                                                                                                                                                                                                                                                                                                                                            | -                                                                                                                          | -                                                                                                                                                                                                                                                                  | (29.26)                       |        |
| <i>tmbim4</i>  | <i>TMBIM4</i> | G      | -                                                                                                                                                                                                                                                                                                                                                                            | -                                                                                                                          | -                                                                                                                                                                                                                                                                  | HIGH (53.1)                   | HIGH   |
| <i>tmx1</i>    | <i>TMX1</i>   | ER     | cell redox homeostasis                                                                                                                                                                                                                                                                                                                                                       | -                                                                                                                          | -                                                                                                                                                                                                                                                                  | LOW (12.95)                   | LOW    |
| <i>tnnc1a</i>  | <i>TNNC1</i>  | C      | cardiac muscle contraction, cardiac ventricle development, response to activity, skeletal muscle contraction                                                                                                                                                                                                                                                                 | actin filament binding, Ca <sup>2+</sup> binding, Ca <sup>2+</sup> -dependent protein binding                              | abnormal atrium size, abnormal blood circulation, disrupted cardiac ventricle development, edematous pericardium, disorganised cardiac muscle cells myofibrils and ventricular myocardium sarcomeres, disrupted cardiac conduction and heart contraction [132,274] | [274-278]<br>(0.16)           |        |
| <i>tnnc1b</i>  | <i>TNNC1</i>  | C      | cardiac muscle contraction, regulation of muscle contraction, skeletal muscle contraction                                                                                                                                                                                                                                                                                    |                                                                                                                            | -                                                                                                                                                                                                                                                                  | [7,129,276,278-281]<br>(0.17) |        |

|               |              |    |                                                                                                                                                                                                                      |                                                                                                                           |                                                                                                                                                                                                                                                                |                          |          |
|---------------|--------------|----|----------------------------------------------------------------------------------------------------------------------------------------------------------------------------------------------------------------------|---------------------------------------------------------------------------------------------------------------------------|----------------------------------------------------------------------------------------------------------------------------------------------------------------------------------------------------------------------------------------------------------------|--------------------------|----------|
| <i>tpcn1</i>  | <i>TPCN1</i> | PM | ion transport, transmembrane transport                                                                                                                                                                               |                                                                                                                           | -                                                                                                                                                                                                                                                              | VERY LOW<br>(14.87)      | VERY LOW |
| <i>tpcn2</i>  | <i>TPCN2</i> | PM | Ca <sup>2+</sup> transmembrane transport, Ca <sup>2+</sup> -mediated signaling, regulation of ion transmembrane transport, regulation of myotome development, skeletal myofibril assembly, smooth muscle contraction | NAADP-sensitive Ca <sup>2+</sup> release channel activity, voltage-gated Ca <sup>2+</sup> channel activity                | asynchronous CaP motoneuron release of sequestered Ca <sup>2+</sup> into cytosol, blood cell accumulation in the heart, eye, head and trunk decreased pigmentation, myotome decreased width, slow muscle cell skeletal muscle myofibril disorganized [282,283] | [284]<br>(0.54)          |          |
| <i>trpa1a</i> | <i>TRPA1</i> | PM | detection of chemical stimulus, detection of mechanical stimulus involved in sensory perception, ion transmembrane transport                                                                                         | Ca <sup>2+</sup> release channel activity, ligand-gated ion channel activity, mechanosensitive ion channel activity       | -                                                                                                                                                                                                                                                              | [285]<br>(14.89)         |          |
| <i>trpa1b</i> | <i>TRPA1</i> | PM |                                                                                                                                                                                                                      |                                                                                                                           | abnormal chemosensory behavior [286]                                                                                                                                                                                                                           | [285,287]<br>(0.69)      |          |
| <i>trpc1</i>  | <i>TRPC1</i> | PM | angiogenesis, Ca <sup>2+</sup> transmembrane transport, filopodium assembly, manganese ion transport, regulation of cytosolic Ca <sup>2+</sup> concentration, vasculogenesis                                         | Ca <sup>2+</sup> channel activity, inositol 1,4,5 trisphosphate binding, store-operated Ca <sup>2+</sup> channel activity | eye decreased size, intersegmental vein decreased size, post-vent region increased curvature, abnormal vasculogenesis paedomorphic growth, abnormal filopodium assembly paedomorphic growth [288]                                                              | [111,289-291]<br>(57.22) |          |
| <i>trpc2a</i> | <i>TRPC2</i> | PM | Ca <sup>2+</sup> transmembrane transport                                                                                                                                                                             | Ca <sup>2+</sup> channel activity                                                                                         | -                                                                                                                                                                                                                                                              | [290,292]<br>(0.39)      |          |
| <i>trpc2b</i> | <i>TRPC2</i> | PM | Ca <sup>2+</sup> transmembrane transport, manganese ion transport, regulation of cytosolic Ca <sup>2+</sup> concentration, single fertilization                                                                      | Ca <sup>2+</sup> channel activity, inositol 1,4,5 trisphosphate binding, store-operated Ca <sup>2+</sup> channel activity | -                                                                                                                                                                                                                                                              | [290,293,294]<br>(0.25)  |          |
| <i>trpc3</i>  | <i>TRPC3</i> | PM | Ca <sup>2+</sup> transmembrane transport, manganese ion transport, regulation of cytosolic Ca <sup>2+</sup> concentration, single fertilization                                                                      | Ca <sup>2+</sup> channel activity, inositol 1,4,5 trisphosphate binding, store-operated Ca <sup>2+</sup> channel activity | -                                                                                                                                                                                                                                                              | [290]<br>(18.57)         |          |
| <i>trpc4a</i> | <i>TRPC4</i> | PM | Ca <sup>2+</sup> transmembrane transport                                                                                                                                                                             | Ca <sup>2+</sup> channel activity                                                                                         | -                                                                                                                                                                                                                                                              | [290]<br>(20.97)         |          |
| <i>trpc4b</i> | <i>TRPC4</i> | PM | Ca <sup>2+</sup> transmembrane transport, manganese ion transport, regulation of cytosolic Ca <sup>2+</sup> concentration, protein homotetramerization                                                               |                                                                                                                           | -                                                                                                                                                                                                                                                              | [290]<br>(11.42)         |          |
| <i>trpc5a</i> | <i>TRPC5</i> | PM | Ca <sup>2+</sup> transmembrane transport, manganese ion transport, regulation of cytosolic Ca <sup>2+</sup> concentration                                                                                            | Ca <sup>2+</sup> channel activity, inositol 1,4,5 trisphosphate binding, store-operated Ca <sup>2+</sup> channel activity | -                                                                                                                                                                                                                                                              | [111,290]<br>(3.07)      |          |
| <i>trpc6a</i> | <i>TRPC6</i> | PM | Ca <sup>2+</sup> transmembrane transport, manganese ion transport, regulation of cytosolic Ca <sup>2+</sup> concentration                                                                                            |                                                                                                                           | -                                                                                                                                                                                                                                                              | VERY LOW<br>(0.91)       | VERY LOW |
| <i>trpc6b</i> | <i>TRPC6</i> | PM | concentration, single fertilization                                                                                                                                                                                  |                                                                                                                           |                                                                                                                                                                                                                                                                | [290]<br>(13.28)         |          |

|                     |                     |         |                                                                                                                                                                                                                                                                                                                                                                                                                                                                                                                                                                          |                                                                                |                                                                                                                                                                                                                                                                                                                                                                                                                                                                                                                           |                                                  |
|---------------------|---------------------|---------|--------------------------------------------------------------------------------------------------------------------------------------------------------------------------------------------------------------------------------------------------------------------------------------------------------------------------------------------------------------------------------------------------------------------------------------------------------------------------------------------------------------------------------------------------------------------------|--------------------------------------------------------------------------------|---------------------------------------------------------------------------------------------------------------------------------------------------------------------------------------------------------------------------------------------------------------------------------------------------------------------------------------------------------------------------------------------------------------------------------------------------------------------------------------------------------------------------|--------------------------------------------------|
| <i>trpc7b</i>       | <i>TRPC7</i>        | PM      | Ca <sup>2+</sup> transmembrane transport                                                                                                                                                                                                                                                                                                                                                                                                                                                                                                                                 | Ca <sup>2+</sup> channel activity                                              | -                                                                                                                                                                                                                                                                                                                                                                                                                                                                                                                         | [290]<br>(4.29)                                  |
| <i>trpm1b</i>       | <i>TRPM1</i>        | PM      | G protein-coupled glutamate receptor signaling pathway, cellular response to light stimulus, protein tetramerization                                                                                                                                                                                                                                                                                                                                                                                                                                                     | cation channel activity                                                        | -                                                                                                                                                                                                                                                                                                                                                                                                                                                                                                                         | [295]<br>(0.4)                                   |
| <i>trpm2</i>        | <i>TRPM2</i>        | PM      | cation transport, ion transmembrane transport, response to oxidative stress                                                                                                                                                                                                                                                                                                                                                                                                                                                                                              | ADP-ribose diphosphatase activity, cation channel activity, hydrolase activity | -                                                                                                                                                                                                                                                                                                                                                                                                                                                                                                                         | [295]<br>(2.85)                                  |
| <u><i>trpm3</i></u> | <u><i>TRPM3</i></u> | PM      | cation transport, detection of temperature stimulus, ion transmembrane transport, protein tetramerization                                                                                                                                                                                                                                                                                                                                                                                                                                                                | Ca <sup>2+</sup> activated cation channel activity                             | -                                                                                                                                                                                                                                                                                                                                                                                                                                                                                                                         | [295]<br>VERY LOW (102.34) VERY LOW              |
| <i>trpm4a</i>       | <i>TRPM4</i>        | PM/ER/G | cardiac conduction, cation transport, ion transmembrane transport, regulation of T cell                                                                                                                                                                                                                                                                                                                                                                                                                                                                                  | Ca <sup>2+</sup> activated cation channel activity                             | -                                                                                                                                                                                                                                                                                                                                                                                                                                                                                                                         | VERY LOW (1.06) VERY LOW                         |
| <i>trpm4b.1</i>     | <i>TRPM4</i>        | PM      | cytokine production, regulation of membrane potential, vasoconstriction                                                                                                                                                                                                                                                                                                                                                                                                                                                                                                  |                                                                                | -                                                                                                                                                                                                                                                                                                                                                                                                                                                                                                                         | (0.12)                                           |
| <i>trpm4b.2</i>     | <i>TRPM4</i>        | PM      |                                                                                                                                                                                                                                                                                                                                                                                                                                                                                                                                                                          |                                                                                | -                                                                                                                                                                                                                                                                                                                                                                                                                                                                                                                         | (0.1)                                            |
| <i>trpm5</i>        | <i>TRPM5</i>        | PM      | Ca <sup>2+</sup> transmembrane transport, sensory perception of taste                                                                                                                                                                                                                                                                                                                                                                                                                                                                                                    |                                                                                | -                                                                                                                                                                                                                                                                                                                                                                                                                                                                                                                         | [289,295,296]<br>(0.49)                          |
| <i>trpm6</i>        | <i>TRPM6</i>        | PM      | cation transport, protein phosphorylation, protein tetramerization                                                                                                                                                                                                                                                                                                                                                                                                                                                                                                       | ATP binding, cation channel activity, protein serine/threonine kinase activity | -                                                                                                                                                                                                                                                                                                                                                                                                                                                                                                                         | [297]<br>(1.49)                                  |
| <u><i>trpm7</i></u> | <u><i>TRPM7</i></u> | PM      | cation transport, cellular magnesium ion homeostasis, developmental pigmentation, divalent inorganic cation homeostasis, exocrine pancreas development, ion transmembrane transport, magnesium ion homeostasis, melanin metabolic process, melanocyte differentiation, ossification, protein phosphorylation, protein tetramerization, regulation of epithelial cell proliferation, regulation of heart rate, regulation of mitotic cell cycle, regulation of neurotransmitter secretion, renal system process, sensory perception of taste, skeletal system development |                                                                                | disrupted regulation of melanocytes membrane potential, abnormal swimming behavior, decreased amount of dopaminergic neurons, increased amount of pretectum serotonergic neurons, decreased heart contraction rate, decreased amount of melanocytes, arrested thigmotaxis, decreased pigmentation, decreased size of acinar cells, hypoplastic exocrine pancreas, disrupted mitotic cell cycle, abnormal calicum and magnesium ions homeostasis, obstructed pronephric duct, decreased functionality of kidneys [298-303] | [1,295,301,304,305]<br>VERY LOW (84.68) VERY LOW |
| <i>trpn1</i>        | <i>TRPN1</i>        | PM      | Ca <sup>2+</sup> transmembrane transport, detection of mechanical stimulus involved in sensory perception of sound                                                                                                                                                                                                                                                                                                                                                                                                                                                       | Ca <sup>2+</sup> channel activity, mechanosensitive ion channel activity       | -                                                                                                                                                                                                                                                                                                                                                                                                                                                                                                                         | [289]<br>(2.25)                                  |

|               |              |      |                                                                                                                                                                       |                                      |                                                                                                                                                                                                                                                                                                  |                                   |            |
|---------------|--------------|------|-----------------------------------------------------------------------------------------------------------------------------------------------------------------------|--------------------------------------|--------------------------------------------------------------------------------------------------------------------------------------------------------------------------------------------------------------------------------------------------------------------------------------------------|-----------------------------------|------------|
| <i>trpv1</i>  | <i>TRPV1</i> | PM   | ion transport, response to heat, thermosensory behavior                                                                                                               | Ca <sup>2+</sup> channel activity    | -                                                                                                                                                                                                                                                                                                | [287,289,306]<br><b>(1.55)</b>    |            |
| <i>trpv4</i>  | <i>TRPV4</i> | PM   | atrioventricular valve development, cellular response to oscillatory fluid shear stress, ion transport, response to osmotic stress                                    |                                      | atrioventricular canal endocardium EGFP expression decreased, abnormal atrioventricular canal and valve morphogenesis, atrioventricular canal endocardium endothelial cell decreased amount, hydrocephalic brain [307,308]                                                                       | [289,309-311]<br><b>(1.24)</b>    |            |
| <i>trpv6</i>  | <i>TRPV6</i> | PM   | Ca <sup>2+</sup> homeostasis, Ca <sup>2+</sup> import, hypotonic salinity response, positive regulation of transcription, DNA-templated, response to Ca <sup>2+</sup> | Ca <sup>2+</sup> channel activity    | bone mineralization and ossification decreased, abnormal postcranial axial skeleton cartilaginous [312]                                                                                                                                                                                          | [69,289,313,314]<br><b>(1.22)</b> |            |
| <i>ttc9b</i>  | <i>TTC9B</i> | Mt/C | -                                                                                                                                                                     | -                                    | -                                                                                                                                                                                                                                                                                                | <b>(17.38)</b>                    |            |
| <i>ttc9c</i>  | <i>TTC9C</i> | N    | cilium assembly, determination of heart left/right asymmetry, otolith morphogenesis                                                                                   | -                                    | curved trunk, hydrocephalic brain, disrupted determination of heart left/right asymmetry disrupted, abnormal otolith morphology, ventricular system dilated, abnormal cilium movement, decreased amount and length of Kupffer's vesicle cilium, pronephric duct motile cilium disorganized [204] | <b>(7.71)</b>                     |            |
| <i>tusc2a</i> | <i>TUSC2</i> | Mt   | -                                                                                                                                                                     | -                                    | -                                                                                                                                                                                                                                                                                                | <b>MEDIUM (11.61)</b>             | <b>LOW</b> |
| <i>tusc2b</i> | <i>TUSC2</i> | Mt   | -                                                                                                                                                                     | -                                    | -                                                                                                                                                                                                                                                                                                | <b>VERY LOW (22.61)</b>           | <b>LOW</b> |
| <i>vdac1</i>  | <i>VDAC1</i> | Mt   | anion transmembrane transport                                                                                                                                         | voltage-gated anion channel activity | -                                                                                                                                                                                                                                                                                                | [315]<br><b>(96.08)</b>           |            |
| <i>vdac2</i>  | <i>VDAC2</i> | Mt   | anion transmembrane transport, Ca <sup>2+</sup> import into the mitochondrion, fin regeneration, regulation of heart contraction,                                     |                                      | -                                                                                                                                                                                                                                                                                                | [17,127]<br><b>(100.88)</b>       |            |
| <i>vdac3</i>  | <i>VDAC3</i> | Mt   | anion transmembrane transport, fin regeneration, regulation of cilium assembly                                                                                        |                                      | -                                                                                                                                                                                                                                                                                                | [7]<br><b>(86.1)</b>              |            |
| <i>vwde</i>   | <i>VWDE</i>  | EM   | -                                                                                                                                                                     | signaling receptor binding           | -                                                                                                                                                                                                                                                                                                | <b>(0.16)</b>                     |            |
| <i>wfs1a</i>  | <i>WFS1</i>  | ER   | Ca <sup>2+</sup> homeostasis                                                                                                                                          | -                                    | -                                                                                                                                                                                                                                                                                                | [7]<br><b>(1.91)</b>              |            |
| <i>wif1</i>   | <i>WIF1</i>  | EM   | negative regulation of canonical Wnt signaling pathway, swim bladder development                                                                                      | signaling receptor binding           | increased signaling via canonical Wnt pathway, abnormal anterior swim bladder, immature somites, decreased trunk length, abnormal pancreas morphology, disrupted smooth muscles development [316]                                                                                                | [6,316-321]<br><b>(3.09)</b>      |            |

1. Thisse, B.; Pflumio, S.; Fürthauer, M.; Loppin, B.; Heyer, V.; Degrave, A.; Woehl, R.; Lux, A.; Steffan, T.; Charbonnier, X.Q., et al. Expression of the zebrafish genome during embryogenesis. (NIH R01 RR15402). ZFIN Direct Data Submission: 2001.
2. Cheng, Y.C.; Hsieh, F.Y.; Chiang, M.C.; Scotting, P.J.; Shih, H.Y.; Lin, S.J.; Wu, H.L.; Lee, H.T. Akt1 mediates neuronal differentiation in zebrafish via a reciprocal interaction with notch signaling. *PLoS one* **2013**, *8*, e54262, doi:10.1371/journal.pone.0054262.
3. Jensen, P.J.; Gunter, L.B.; Carayannopoulos, M.O. Akt2 modulates glucose availability and downstream apoptotic pathways during development. *The Journal of biological chemistry* **2010**, *285*, 17673-17680, doi:10.1074/jbc.M109.079343.
4. Zhang, D.; Wang, J.; Zhou, C.; Xiao, W. Zebrafish akt2 is essential for survival, growth, bone development, and glucose homeostasis. *Mechanisms of development* **2017**, *143*, 42-52, doi:10.1016/j.mod.2017.01.004.
5. Roostalu, U.; Strahle, U. In vivo imaging of molecular interactions at damaged sarcolemma. *Developmental cell* **2012**, *22*, 515-529, doi:10.1016/j.devcel.2011.12.008.
6. Thisse, C.; Thisse, B. High Throughput Expression Analysis of ZF-Models Consortium Clones. ZFIN Direct Data Submission.: 2005.
7. Thisse, B.; Thisse, C. Fast Release Clones: A High Throughput Expression Analysis. ZFIN Direct Data Submission: 2004.
8. Takamiya, M.; Weger, B.D.; Schindler, S.; Beil, T.; Yang, L.; Armant, O.; Ferg, M.; Schlunck, G.; Reinhard, T.; Dickmeis, T., et al. Molecular description of eye defects in the zebrafish Pax6b mutant, sunrise, reveals a Pax6b-dependent genetic network in the developing anterior chamber. *PLoS one* **2015**, *10*, e0117645, doi:10.1371/journal.pone.0117645.
9. Zhang, D.; Golubkov, V.S.; Han, W.; Correa, R.G.; Zhou, Y.; Lee, S.; Strongin, A.Y.; Dong, P.D. Identification of Annexin A4 as a hepatopancreas factor involved in liver cell survival. *Developmental biology* **2014**, *395*, 96-110, doi:10.1016/j.ydbio.2014.08.025.
10. Korzh, S.; Winata, C.L.; Zheng, W.; Yang, S.; Yin, A.; Ingham, P.; Korzh, V.; Gong, Z. The interaction of epithelial Ihha and mesenchymal Fgf10 in zebrafish esophageal and swimbladder development. *Developmental biology* **2011**, *359*, 262-276, doi:10.1016/j.ydbio.2011.08.024.
11. Erickson, T.; Nicolson, T. Identification of sensory hair-cell transcripts by thiouracil-tagging in zebrafish. *BMC genomics* **2015**, *16*, 842, doi:10.1186/s12864-015-2072-5.
12. Teoh, P.H.; Shu-Chien, A.C.; Chan, W.K. Pbx1 is essential for growth of zebrafish swim bladder. *Developmental dynamics : an official publication of the American Association of Anatomists* **2010**, *239*, 865-874, doi:10.1002/dvdy.22221.
13. Solomon, K.S.; Fritz, A. Concerted action of two dlx paralogs in sensory placode formation. *Development* **2002**, *129*, 3127-3136.
14. Granato, M.; van Eeden, F.J.; Schach, U.; Trowe, T.; Brand, M.; Furutani-Seiki, M.; Haffter, P.; Hammerschmidt, M.; Heisenberg, C.P.; Jiang, Y.J., et al. Genes controlling and mediating locomotion behavior of the zebrafish embryo and larva. *Development (Cambridge, England)* **1996**, *123*, 399-413.
15. Hirata, H.; Saint-Amant, L.; Waterbury, J.; Cui, W.; Zhou, W.; Li, Q.; Goldman, D.; Granato, M.; Kuwada, J.Y. accordion, a zebrafish behavioral mutant, has a muscle relaxation defect due to a mutation in the ATPase Ca<sup>2+</sup> pump SERCA1. *Development* **2004**, *131*, 5457-5468, doi:10.1242/dev.01410.
16. Friedrich, T.; Lambert, A.M.; Masino, M.A.; Downes, G.B. Mutation of zebrafish dihydrolipoamide branched-chain transacylase E2 results in motor dysfunction and models maple syrup urine disease. *Disease models & mechanisms* **2012**, *5*, 248-258, doi:10.1242/dmm.008383.
17. Rauch, G.J.; Lyons, D.A.; Middendorf, I.; Friedlander, B.; Arana, N.; Reyes, T.; Talbot, W.S. Submission and Curation of Gene Expression Data. ZFIN Direct Data Submission: 2003.
18. Maves, L.; Waskiewicz, A.J.; Paul, B.; Cao, Y.; Tyler, A.; Moens, C.B.; Tapscott, S.J. Pbx homeodomain proteins direct Myod activity to promote fast-muscle differentiation. *Development* **2007**, *134*, 3371-3382, doi:10.1242/dev.003905.
19. Lin, C.Y.; Chen, J.S.; Loo, M.R.; Hsiao, C.C.; Chang, W.Y.; Tsai, H.J. MicroRNA-3906 regulates fast muscle differentiation through modulating the target gene homer-1b in zebrafish embryos. *PLoS one* **2013**, *8*, e70187, doi:10.1371/journal.pone.0070187.
20. Ebert, A.M.; Hume, G.L.; Warren, K.S.; Cook, N.P.; Burns, C.G.; Mohideen, M.A.; Siegal, G.; Yelon, D.; Fishman, M.C.; Garrity, D.M. Calcium extrusion is critical for cardiac morphogenesis and rhythm in embryonic zebrafish hearts. *Proceedings of the National Academy of Sciences of the United States of America* **2005**, *102*, 17705-17710, doi:10.1073/pnas.0502683102.
21. Takeuchi, M.; Yamaguchi, S.; Sakakibara, Y.; Hayashi, T.; Matsuda, K.; Hara, Y.; Tanegashima, C.; Shimizu, T.; Kuraku, S.; Hibi, M. Gene expression profiling of granule cells and Purkinje cells in the zebrafish cerebellum. *The Journal of comparative neurology* **2017**, *525*, 1558-1585, doi:10.1002/cne.24114.
22. Cruz, S.; Shiao, J.C.; Liao, B.K.; Huang, C.J.; Hwang, P.P. Plasma membrane calcium ATPase required for semicircular canal formation and otolith growth in the zebrafish inner ear. *The Journal of experimental biology* **2009**, *212*, 639-647, doi:10.1242/jeb.022798.
23. Go, W.; Bessarab, D.; Korzh, V. atp2b1a regulates Ca(2+) export during differentiation and regeneration of mechanosensory hair cells in zebrafish. *Cell calcium* **2010**, *48*, 302-313, doi:10.1016/j.ceca.2010.09.012.

24. Go, W.; Korzh, V. Plasma membrane Ca(2+) ATPase Atp2b1a regulates bone mineralization in zebrafish. *Bone* **2013**, *54*, 48-57, doi:10.1016/j.bone.2013.01.026.
25. Liao, B.K.; Deng, A.N.; Chen, S.C.; Chou, M.Y.; Hwang, P.P. Expression and water calcium dependence of calcium transporter isoforms in zebrafish gill mitochondrion-rich cells. *BMC genomics* **2007**, *8*, 354, doi:10.1186/1471-2164-8-354.
26. Xia, Z.; Wei, J.; Li, Y.; Wang, J.; Li, W.; Wang, K.; Hong, X.; Zhao, L.; Chen, C.; Min, J., et al. Zebrafish slc30a10 deficiency revealed a novel compensatory mechanism of Atp2c1 in maintaining manganese homeostasis. *PLoS genetics* **2017**, *13*, e1006892, doi:10.1371/journal.pgen.1006892.
27. Chung, A.Y.; Kim, M.J.; Kim, D.; Bang, S.; Hwang, S.W.; Lim, C.S.; Lee, S.; Park, H.C.; Huh, T.L. Neuron-specific expression of atp6v0c2 in zebrafish CNS. *Developmental dynamics : an official publication of the American Association of Anatomists* **2010**, *239*, 2501-2508, doi:10.1002/dvdy.22383.
28. Hwang, J.; Kim, H.S.; Seok, J.W.; Kim, J.D.; Koun, S.; Park, S.Y.; Lee, J.; Kim, K.S.; Chang, K.T.; Ryoo, Z.Y., et al. Transcriptome analysis of the zebrafish mind bomb mutant. *Molecular genetics and genomics : MGG* **2009**, *281*, 77-85, doi:10.1007/s00438-008-0395-5.
29. Lee, K.C.; Goh, W.L.; Xu, M.; Kua, N.; Lunny, D.; Wong, J.S.; Coomber, D.; Vojtesek, B.; Lane, E.B.; Lane, D.P. Detection of the p53 response in zebrafish embryos using new monoclonal antibodies. *Oncogene* **2008**, *27*, 629-640, doi:10.1038/sj.onc.1210695.
30. Kratz, E.; Eimon, P.M.; Mukhyala, K.; Stern, H.; Zha, J.; Strasser, A.; Hart, R.; Ashkenazi, A. Functional characterization of the Bcl-2 gene family in the zebrafish. *Cell death and differentiation* **2006**, *13*, 1631-1640, doi:10.1038/sj.cdd.4402016.
31. Di Donato, V.; Auer, T.O.; Duroure, K.; Del Bene, F. Characterization of the calcium binding protein family in zebrafish. *PLoS one* **2013**, *8*, e53299, doi:10.1371/journal.pone.0053299.
32. Low, S.E.; Woods, I.G.; Lachance, M.; Ryan, J.; Schier, A.F.; Saint-Amant, L. Touch responsiveness in zebrafish requires voltage-gated calcium channel 2.1b. *Journal of neurophysiology* **2012**, *108*, 148-159, doi:10.1152/jn.00839.2011.
33. Wen, H.; Linhoff, M.W.; Hubbard, J.M.; Nelson, N.R.; Stensland, D.; Dallman, J.; Mandel, G.; Brehm, P. Zebrafish calls for reinterpretation for the roles of P/Q calcium channels in neuromuscular transmission. *The Journal of neuroscience : the official journal of the Society for Neuroscience* **2013**, *33*, 7384-7392, doi:10.1523/jneurosci.5839-12.2013.
34. Jelen, N.; Ule, J.; Zivin, M.; Darnell, R.B. Evolution of Nova-dependent splicing regulation in the brain. *PLoS genetics* **2007**, *3*, 1838-1847, doi:10.1371/journal.pgen.0030173.
35. Ramachandran, K.V.; Hennessey, J.A.; Barnett, A.S.; Yin, X.; Stadt, H.A.; Foster, E.; Shah, R.A.; Yazawa, M.; Dolmetsch, R.E.; Kirby, M.L., et al. Calcium influx through L-type CaV1.2 Ca2+ channels regulates mandibular development. *The Journal of clinical investigation* **2013**, *123*, 1638-1646, doi:10.1172/JCI66903.
36. Muntean, B.S.; Jin, X.; Williams, F.E.; Nauli, S.M. Primary cilium regulates CaV1.2 expression through Wnt signaling. *Journal of cellular physiology* **2014**, *229*, 1926-1934, doi:10.1002/jcp.24642.
37. Jin, X.; Muntean, B.S.; Aal-Aaboda, M.S.; Duan, Q.; Zhou, J.; Nauli, S.M. L-type calcium channel modulates cystic kidney phenotype. *Biochimica et biophysica acta* **2014**, *1842*, 1518-1526, doi:10.1016/j.bbdis.2014.06.001.
38. Andersen, N.D.; Ramachandran, K.V.; Bao, M.M.; Kirby, M.L.; Pitt, G.S.; Hutson, M.R. Calcium signaling regulates ventricular hypertrophy during development independent of contraction or blood flow. *Journal of molecular and cellular cardiology* **2015**, *80*, 1-9, doi:10.1016/j.yjmcc.2014.12.016.
39. Rottbauer, W.; Baker, K.; Wo, Z.G.; Mohideen, M.A.; Cantiello, H.F.; Fishman, M.C. Growth and function of the embryonic heart depend upon the cardiac-specific L-type calcium channel alpha1 subunit. *Developmental cell* **2001**, *1*, 265-275.
40. Trapani, J.G.; Nicolson, T. Mechanism of spontaneous activity in afferent neurons of the zebrafish lateral-line organ. *The Journal of neuroscience : the official journal of the Society for Neuroscience* **2011**, *31*, 1614-1623, doi:10.1523/JNEUROSCI.3369-10.2011.
41. Sheets, L.; Kindt, K.S.; Nicolson, T. Presynaptic CaV1.3 channels regulate synaptic ribbon size and are required for synaptic maintenance in sensory hair cells. *The Journal of neuroscience : the official journal of the Society for Neuroscience* **2012**, *32*, 17273-17286, doi:10.1523/JNEUROSCI.3005-12.2012.
42. Sanhueza, D.; Montoya, A.; Sierralta, J.; Kukuljan, M. Expression of voltage-activated calcium channels in the early zebrafish embryo. *Zygote* **2009**, *17*, 131-135, doi:10.1017/S0967199408005108.
43. Sheets, L.; Trapani, J.G.; Mo, W.; Obholzer, N.; Nicolson, T. Ribeye is required for presynaptic Ca(V)1.3a channel localization and afferent innervation of sensory hair cells. *Development* **2011**, *138*, 1309-1319, doi:10.1242/dev.059451.
44. Lv, C.; Stewart, W.J.; Akanyeti, O.; Frederick, C.; Zhu, J.; Santos-Sacchi, J.; Sheets, L.; Liao, J.C.; Zenisek, D. Synaptic Ribbons Require Ribeye for Electron Density, Proper Synaptic Localization, and Recruitment of Calcium Channels. *Cell reports* **2016**, *15*, 2784-2795, doi:10.1016/j.celrep.2016.05.045.
45. Jia, S.; Muto, A.; Orisme, W.; Henson, H.E.; Parupalli, C.; Ju, B.; Baier, H.; Taylor, M.R. Zebrafish Cacna1fa is required for cone photoreceptor function and synaptic ribbon formation. *Human molecular genetics* **2014**, *23*, 2981-2994, doi:10.1093/hmg/ddu009.

46. Pujic, Z.; Omori, Y.; Tsujikawa, M.; Thisse, B.; Thisse, C.; Malicki, J. Reverse genetic analysis of neurogenesis in the zebrafish retina. *Developmental biology* **2006**, *293*, 330-347, doi:10.1016/j.ydbio.2005.12.056.
47. Chernyavskaya, Y.; Ebert, A.M.; Milligan, E.; Garrity, D.M. Voltage-gated calcium channel CACNB2 (beta2.1) protein is required in the heart for control of cell proliferation and heart tube integrity. *Developmental dynamics : an official publication of the American Association of Anatomists* **2012**, *241*, 648-662, doi:10.1002/dvdy.23746.
48. Ebert, A.M.; McAnelly, C.A.; Srinivasan, A.; Mueller, R.L.; Garrity, D.B.; Garrity, D.M. The calcium channel beta2 (CACNB2) subunit repertoire in teleosts. *BMC molecular biology* **2008**, *9*, 38, doi:10.1186/1471-2199-9-38.
49. Zhou, W.; Horstick, E.J.; Hirata, H.; Kuwada, J.Y. Identification and expression of voltage-gated calcium channel beta subunits in Zebrafish. *Developmental dynamics : an official publication of the American Association of Anatomists* **2008**, *237*, 3842-3852, doi:10.1002/dvdy.21776.
50. Roy, B.; Ahmed, K.T.; Cunningham, M.E.; Ferdous, J.; Mukherjee, R.; Zheng, W.; Chen, X.Z.; Ali, D.W. Zebrafish TARP Cacng2 is required for the expression and normal development of AMPA receptors at excitatory synapses. *Developmental neurobiology* **2016**, *76*, 487-506, doi:10.1002/dneu.22327.
51. Colombo, A.; Palma, K.; Armijo, L.; Mione, M.; Signore, I.A.; Morales, C.; Guerrero, N.; Meynard, M.M.; Perez, R.; Suazo, J., et al. Daam1a mediates asymmetric habenular morphogenesis by regulating dendritic and axonal outgrowth. *Development (Cambridge, England)* **2013**, *140*, 3997-4007, doi:10.1242/dev.091934.
52. Husken, U.; Stickney, H.L.; Gestri, G.; Bianco, I.H.; Faro, A.; Young, R.M.; Roussigne, M.; Hawkins, T.A.; Beretta, C.A.; Brinkmann, I., et al. Tcf7l2 is required for left-right asymmetric differentiation of habenular neurons. *Current biology : CB* **2014**, *24*, 2217-2227, doi:10.1016/j.cub.2014.08.006.
53. Bhojar, R.C.; Jadhao, A.G.; Sivasubbu, S.; Singh, A.R.; Sabharwal, A.; Palande, N.V.; Biswas, S. Neuroanatomical demonstration of calbindin 2a- and calbindin 2b-like calcium binding proteins in the early embryonic development of zebrafish: mRNA study. *International journal of developmental neuroscience : the official journal of the International Society for Developmental Neuroscience* **2017**, *60*, 26-33, doi:10.1016/j.ijdevneu.2017.03.012.
54. Duggan, C.D.; DeMaria, S.; Baudhuin, A.; Stafford, D.; Ngai, J. Foxg1 is required for development of the vertebrate olfactory system. *The Journal of neuroscience : the official journal of the Society for Neuroscience* **2008**, *28*, 5229-5239, doi:10.1523/jneurosci.1134-08.2008.
55. Yokoi, H.; Yan, Y.L.; Miller, M.R.; BreMiller, R.A.; Catchen, J.M.; Johnson, E.A.; Postlethwait, J.H. Expression profiling of zebrafish sox9 mutants reveals that Sox9 is required for retinal differentiation. *Developmental biology* **2009**, *329*, 1-15, doi:10.1016/j.ydbio.2009.01.002.
56. Bae, Y.K.; Kani, S.; Shimizu, T.; Tanabe, K.; Nojima, H.; Kimura, Y.; Higashijima, S.; Hibi, M. Anatomy of zebrafish cerebellum and screen for mutations affecting its development. *Developmental biology* **2009**, *330*, 406-426, doi:10.1016/j.ydbio.2009.04.013.
57. Castro, A.; Becerra, M.; Manso, M.J.; Anadon, R. Calretinin immunoreactivity in the brain of the zebrafish, *Danio rerio*: distribution and comparison with some neuropeptides and neurotransmitter-synthesizing enzymes. I. Olfactory organ and forebrain. *The Journal of comparative neurology* **2006**, *494*, 435-459, doi:10.1002/cne.20782.
58. Sahu, S.U.; Visetsouk, M.R.; Garde, R.J.; Hennes, L.; Kwas, C.; Gutzman, J.H. Calcium signals drive cell shape changes during zebrafish midbrain-hindbrain boundary formation. *Molecular biology of the cell* **2017**, *28*, 875-882, doi:10.1091/mbc.E16-08-0561.
59. Hung, I.C.; Cherng, B.W.; Hsu, W.M.; Lee, S.J. Calnexin is required for zebrafish posterior lateral line development. *The International journal of developmental biology* **2013**, *57*, 427-438, doi:10.1387/ijdb.120166sl.
60. Kudoh, T.; Tsang, M.; Hukriede, N.A.; Chen, X.; Dedekian, M.; Clarke, C.J.; Kiang, A.; Schultz, S.; Epstein, J.A.; Toyama, R., et al. A gene expression screen in zebrafish embryogenesis. ZFIN Direct Data Submission: 2001.
61. Bochner, R.; Samuelov, L.; Sarig, O.; Li, Q.; Adase, C.A.; Isakov, O.; Malchin, N.; Vodo, D.; Shayevitch, R.; Peled, A., et al. Calpain 12 Function Revealed through the Study of an Atypical Case of Autosomal Recessive Congenital Ichthyosis. *The Journal of investigative dermatology* **2017**, *137*, 385-393, doi:10.1016/j.jid.2016.07.043.
62. Gan-Or, Z.; Bouslam, N.; Birouk, N.; Lissouba, A.; Chambers, D.B.; Veriepe, J.; Androschuk, A.; Laurent, S.B.; Rochefort, D.; Spiegelman, D., et al. Mutations in CAPN1 Cause Autosomal-Recessive Hereditary Spastic Paraplegia. *American journal of human genetics* **2016**, *98*, 1038-1046, doi:10.1016/j.ajhg.2016.04.002.
63. Lepage, S.E.; Bruce, A.E. Characterization and comparative expression of zebrafish calpain system genes during early development. *Developmental dynamics : an official publication of the American Association of Anatomists* **2008**, *237*, 819-829, doi:10.1002/dvdy.21459.
64. Tao, T.; Shi, H.; Guan, Y.; Huang, D.; Chen, Y.; Lane, D.P.; Chen, J.; Peng, J. Def defines a conserved nucleolar pathway that leads p53 to proteasome-independent degradation. *Cell research* **2013**, *23*, 620-634, doi:10.1038/cr.2013.16.
65. Herberger, A.L.; Loretz, C.A. Morpholino oligonucleotide knockdown of the extracellular calcium-sensing receptor impairs early skeletal development in zebrafish. *Comparative biochemistry and physiology. Part A, Molecular & integrative physiology* **2013**, *166*, 470-481, doi:10.1016/j.cbpa.2013.07.027.



66. Lin, C.H.; Su, C.H.; Hwang, P.P. Calcium-sensing receptor mediates Ca(2+) homeostasis by modulating expression of PTH and stanniocalcin. *Endocrinology* **2014**, *155*, 56-67, doi:10.1210/en.2013-1608.
67. Lin, C.H.; Hu, H.J.; Hwang, P.P. Molecular Physiology of the Hypocalcemic Action of Fibroblast Growth Factor 23 in Zebrafish (*Danio rerio*). *Endocrinology* **2017**, *158*, 1347-1358, doi:10.1210/en.2016-1883.
68. Jain, R.A.; Wolman, M.A.; Marsden, K.C.; Nelson, J.C.; Shoenhard, H.; Echeverry, F.A.; Szi, C.; Bell, H.; Skinner, J.; Cobbs, E.N., et al. A Forward Genetic Screen in Zebrafish Identifies the G-Protein-Coupled Receptor CaSR as a Modulator of Sensorimotor Decision Making. *Current biology : CB* **2018**, *28*, 1357-1369 e1355, doi:10.1016/j.cub.2018.03.025.
69. Kwong, R.W.; Auprix, D.; Perry, S.F. Involvement of the calcium-sensing receptor in calcium homeostasis in larval zebrafish exposed to low environmental calcium. *American journal of physiology. Regulatory, integrative and comparative physiology* **2014**, *306*, R211-221, doi:10.1152/ajpregu.00350.2013.
70. Astin, J.W.; Haggerty, M.J.; Okuda, K.S.; Le Guen, L.; Misa, J.P.; Tromp, A.; Hogan, B.M.; Crosier, K.E.; Crosier, P.S. Vegfd can compensate for loss of Vegfc in zebrafish facial lymphatic sprouting. *Development (Cambridge, England)* **2014**, *141*, 2680-2690, doi:10.1242/dev.106591.
71. Jaffe, K.M.; Grimes, D.T.; Schottenfeld-Roames, J.; Werner, M.E.; Ku, T.S.; Kim, S.K.; Pelliccia, J.L.; Morante, N.F.; Mitchell, B.J.; Burdine, R.D. c21orf59/kurly Controls Both Cilia Motility and Polarization. *Cell reports* **2016**, *14*, 1841-1849, doi:10.1016/j.celrep.2016.01.069.
72. Norden, C.; Young, S.; Link, B.A.; Harris, W.A. Actomyosin is the main driver of interkinetic nuclear migration in the retina. *Cell* **2009**, *138*, 1195-1208, doi:10.1016/j.cell.2009.06.032.
73. Delaval, B.; Covassin, L.; Lawson, N.D.; Doxsey, S. Centrin depletion causes cyst formation and other ciliopathy-related phenotypes in zebrafish. *Cell cycle* **2011**, *10*, 3964-3972, doi:10.4161/cc.10.22.18150.
74. Marra, A.N.; Wingert, R.A. Epithelial cell fate in the nephron tubule is mediated by the ETS transcription factors etv5a and etv4 during zebrafish kidney development. *Developmental biology* **2016**, *411*, 231-245, doi:10.1016/j.ydbio.2016.01.035.
75. Yu, X.; Ng, C.P.; Habacher, H.; Roy, S. Foxj1 transcription factors are master regulators of the motile ciliogenic program. *Nature genetics* **2008**, *40*, 1445-1453, doi:10.1038/ng.263.
76. Mendoza-Ferreira, N.; Coutelier, M.; Janzen, E.; Hosseiniabarkooie, S.; Lohr, H.; Schneider, S.; Milbradt, J.; Karakaya, M.; Riessland, M.; Pichlo, C., et al. Biallelic CHP1 mutation causes human autosomal recessive ataxia by impairing NHE1 function. *Neurology. Genetics* **2018**, *4*, e209, doi:10.1212/nxg.0000000000000209.
77. Ponomareva, O.Y.; Holmen, I.C.; Sperry, A.J.; Eliceiri, K.W.; Halloran, M.C. Calsyntenin-1 regulates axon branching and endosomal trafficking during sensory neuron development in vivo. *The Journal of neuroscience : the official journal of the Society for Neuroscience* **2014**, *34*, 9235-9248, doi:10.1523/jneurosci.0561-14.2014.
78. Ortiz-Medina, H.; Emond, M.R.; Jontes, J.D. Zebrafish calsyntenins mediate homophilic adhesion through their amino-terminal cadherin repeats. *Neuroscience* **2015**, *286*, 87-96, doi:10.1016/j.neuroscience.2014.11.030.
79. Lee, T.J.; Lee, J.W.; Haynes, E.M.; Eliceiri, K.W.; Halloran, M.C. The Kinesin Adaptor Calsyntenin-1 Organizes Microtubule Polarity and Regulates Dynamics during Sensory Axon Arbor Development. *Frontiers in cellular neuroscience* **2017**, *11*, 107, doi:10.3389/fncel.2017.00107.
80. Dworkin, S.; Heath, J.K.; deJong-Curtain, T.A.; Hogan, B.M.; Lieschke, G.J.; Malaterre, J.; Ramsay, R.G.; Mantamadiotis, T. CREB activity modulates neural cell proliferation, midbrain-hindbrain organization and patterning in zebrafish. *Developmental biology* **2007**, *307*, 127-141, doi:10.1016/j.ydbio.2007.04.026.
81. Melville, D.B.; Montero-Balaguer, M.; Levic, D.S.; Bradley, K.; Smith, J.R.; Hatzopoulos, A.K.; Knapik, E.W. The feelgood mutation in zebrafish dysregulates COPII-dependent secretion of select extracellular matrix proteins in skeletal morphogenesis. *Disease models & mechanisms* **2011**, *4*, 763-776, doi:10.1242/dmm.007625.
82. Thisse, C.; Thisse, B. Expression from: Unexpected Novel Relational Links Uncovered by Extensive Developmental Profiling of Nuclear Receptor Expression. . ZFIN Direct Data Submission: 2008.
83. Batut, J.; Duboe, C.; Vandel, L. Expression patterns of CREB binding protein (CREBBP) and its methylated species during zebrafish development. *The International journal of developmental biology* **2015**, *59*, 229-234, doi:10.1387/ijdb.140197LV.
84. Manchenkov, T.; Pasillas, M.P.; Haddad, G.G.; Imam, F.B. Novel Genes Critical for Hypoxic Preconditioning in Zebrafish Are Regulators of Insulin and Glucose Metabolism. *G3 (Bethesda, Md.)* **2015**, *5*, 1107-1116, doi:10.1534/g3.115.018010.
85. Feitosa, N.M.; Zhang, J.; Carney, T.J.; Metzger, M.; Korzh, V.; Bloch, W.; Hammerschmidt, M. Hemicentin 2 and Fibulin 1 are required for epidermal-dermal junction formation and fin mesenchymal cell migration during zebrafish development. *Developmental biology* **2012**, *369*, 235-248, doi:10.1016/j.ydbio.2012.06.023.
86. Baxendale, S.; Chen, C.K.; Tang, H.; Davison, C.; Hateren, L.V.; Croning, M.D.; Humphray, S.J.; Hubbard, S.J.; Ingham, P.W. Expression screening and annotation of a zebrafish myoblast cDNA library. *Gene expression patterns : GEP* **2009**, *9*, 73-82, doi:10.1016/j.gep.2008.10.003.

87. Schmidt, M.; De Maziere, A.; Smyczek, T.; Gray, A.; Parker, L.; Filvaroff, E.; French, D.; van Dijk, S.; Klumperman, J.; Ye, W. The role of Egfl7 in vascular morphogenesis. *Novartis Foundation symposium* **2007**, *283*, 18-28; discussion 28-36, 238-241.
88. De Maziere, A.; Parker, L.; Van Dijk, S.; Ye, W.; Klumperman, J. Egfl7 knockdown causes defects in the extension and junctional arrangements of endothelial cells during zebrafish vasculogenesis. *Developmental dynamics : an official publication of the American Association of Anatomists* **2008**, *237*, 580-591, doi:10.1002/dvdy.21441.
89. Rossi, A.; Kontarakis, Z.; Gerri, C.; Nolte, H.; Holper, S.; Kruger, M.; Stainier, D.Y. Genetic compensation induced by deleterious mutations but not gene knockdowns. *Nature* **2015**, *524*, 230-233, doi:10.1038/nature14580.
90. He, X.; Yan, Y.L.; DeLaurier, A.; Postlethwait, J.H. Observation of miRNA gene expression in zebrafish embryos by in situ hybridization to microRNA primary transcripts. *Zebrafish* **2011**, *8*, 1-8, doi:10.1089/zeb.2010.0680.
91. Zou, J.; Li, W.Q.; Li, Q.; Li, X.Q.; Zhang, J.T.; Liu, G.Q.; Chen, J.; Qiu, X.X.; Tian, F.J.; Wang, Z.Z., et al. Two functional microRNA-126s repress a novel target gene p21-activated kinase 1 to regulate vascular integrity in zebrafish. *Circulation research* **2011**, *108*, 201-209, doi:10.1161/circresaha.110.225045.
92. Lu, Q.; Insinna, C.; Ott, C.; Stauffer, J.; Pintado, P.A.; Rahajeng, J.; Baxa, U.; Walia, V.; Cuenca, A.; Hwang, Y.S., et al. Early steps in primary cilium assembly require EHD1/EHD3-dependent ciliary vesicle formation. *Nature cell biology* **2015**, *17*, 228-240, doi:10.1038/ncb3109.
93. Seiler, C.; Gebhart, N.; Zhang, Y.; Shinton, S.A.; Li, Y.S.; Ross, N.L.; Liu, X.; Li, Q.; Bilbee, A.N.; Varshney, G.K., et al. Mutagenesis Screen Identifies agtpbp1 and eps15L1 as Essential for T lymphocyte Development in Zebrafish. *PLoS one* **2015**, *10*, e0131908, doi:10.1371/journal.pone.0131908.
94. Russell, M.W.; Raeker, M.O.; Geisler, S.B.; Thomas, P.E.; Simmons, T.A.; Bernat, J.A.; Thorsson, T.; Innis, J.W. Functional analysis of candidate genes in 2q13 deletion syndrome implicates FBLN7 and TMEM87B deficiency in congenital heart defects and FBLN7 in craniofacial malformations. *Human molecular genetics* **2014**, *23*, 4272-4284, doi:10.1093/hmg/ddu144.
95. Giustiniani, J.; Chambraud, B.; Sardin, E.; Dounane, O.; Guillemeau, K.; Nakatani, H.; Paquet, D.; Kamah, A.; Landrieu, I.; Lippens, G., et al. Immunophilin FKBP52 induces Tau-P301L filamentous assembly in vitro and modulates its activity in a model of tauopathy. *Proceedings of the National Academy of Sciences of the United States of America* **2014**, *111*, 4584-4589, doi:10.1073/pnas.1402645111.
96. Benato, F.; Colletti, E.; Skobo, T.; Moro, E.; Colombo, L.; Argenton, F.; Dalla Valle, L. A living biosensor model to dynamically trace glucocorticoid transcriptional activity during development and adult life in zebrafish. *Molecular and cellular endocrinology* **2014**, *392*, 60-72, doi:10.1016/j.mce.2014.04.015.
97. Vettori, A.; Greenald, D.; Wilson, G.K.; Peron, M.; Facchinello, N.; Markham, E.; Sinnakaruppan, M.; Matthews, L.C.; McKeating, J.A.; Argenton, F., et al. Glucocorticoids promote Von Hippel Lindau degradation and Hif-1alpha stabilization. *Proceedings of the National Academy of Sciences of the United States of America* **2017**, *114*, 9948-9953, doi:10.1073/pnas.1705338114.
98. Westcot, S.E.; Hatzold, J.; Urban, M.D.; Richetti, S.K.; Skuster, K.J.; Harm, R.M.; Lopez Cervera, R.; Umemoto, N.; McNulty, M.S.; Clark, K.J., et al. Protein-Trap Insertional Mutagenesis Uncovers New Genes Involved in Zebrafish Skin Development, Including a Neuregulin 2a-Based ErbB Signaling Pathway Required during Median Fin Fold Morphogenesis. *PLoS one* **2015**, *10*, e0130688, doi:10.1371/journal.pone.0130688.
99. Yakkundi, A.; Bennett, R.; Hernandez-Negrete, I.; Delalande, J.M.; Hanna, M.; Lyubomska, O.; Arthur, K.; Short, A.; McKeen, H.; Nelson, L., et al. FKBPL is a critical antiangiogenic regulator of developmental and pathological angiogenesis. *Arteriosclerosis, thrombosis, and vascular biology* **2015**, *35*, 845-854, doi:10.1161/ATVBAHA.114.304539.
100. Lin, W.H.; Wu, C.H.; Chen, Y.C.; Chow, W.Y. Embryonic expression of zebrafish AMPA receptor genes: zygotic *gria2alpha* expression initiates at the midblastula transition. *Brain research* **2006**, *1110*, 46-54, doi:10.1016/j.brainres.2006.06.054.
101. Hopmann, V.; Wu, J.J.; Soviknes, A.M.; Helvik, J.V.; Becker, T.S. Expression of the eight AMPA receptor subunit genes in the developing central nervous system and sensory organs of zebrafish. *Developmental dynamics : an official publication of the American Association of Anatomists* **2008**, *237*, 788-799, doi:10.1002/dvdy.21447.
102. Li, I.C.; Chen, Y.C.; Wang, Y.Y.; Tzeng, B.W.; Ou, C.W.; Lau, Y.Y.; Wu, K.M.; Chan, T.M.; Lin, W.H.; Hwang, S.P., et al. Zebrafish *Adar2* Edits the Q/R site of AMPA receptor Subunit *gria2alpha* transcript to ensure normal development of nervous system and cranial neural crest cells. *PLoS one* **2014**, *9*, e97133, doi:10.1371/journal.pone.0097133.
103. Fuller, C.L.; Villanueva, R.; Byrd, C.A. Changes in glutamate receptor subunit 4 expression in the deafferented olfactory bulb of zebrafish. *Brain research* **2005**, *1044*, 251-261, doi:10.1016/j.brainres.2005.03.012.
104. Scheldeman, C.; Mills, J.D.; Siekierska, A.; Serra, I.; Copmans, D.; Iyer, A.M.; Whalley, B.J.; Maes, J.; Jansen, A.C.; Lagae, L., et al. mTOR-related neuropathology in mutant *tsc2* zebrafish: Phenotypic, transcriptomic and pharmacological analysis. *Neurobiology of disease* **2017**, *108*, 225-237, doi:10.1016/j.nbd.2017.09.004.

105. Cox, J.A.; Kucenas, S.; Voigt, M.M. Molecular characterization and embryonic expression of the family of N-methyl-D-aspartate receptor subunit genes in the zebrafish. *Developmental dynamics : an official publication of the American Association of Anatomists* **2005**, *234*, 756-766, doi:10.1002/dvdy.20532.
106. Tzeng, D.W.; Lin, M.H.; Chen, B.Y.; Chen, Y.C.; Chang, Y.C.; Chow, W.Y. Molecular and functional studies of tilapia (*Oreochromis mossambicus*) NMDA receptor NR1 subunits. *Comparative biochemistry and physiology. Part B, Biochemistry & molecular biology* **2007**, *146*, 402-411, doi:10.1016/j.cbpb.2006.11.026.
107. Xie, Y.; Kaufmann, D.; Moulton, M.J.; Panahi, S.; Gaynes, J.A.; Watters, H.N.; Zhou, D.; Xue, H.H.; Fung, C.M.; Levine, E.M., et al. Lef1-dependent hypothalamic neurogenesis inhibits anxiety. *PLoS biology* **2017**, *15*, e2002257, doi:10.1371/journal.pbio.2002257.
108. Rojas-Rivera, D.; Armisen, R.; Colombo, A.; Martinez, G.; Eguiguren, A.L.; Diaz, A.; Kiviluoto, S.; Rodriguez, D.; Patron, M.; Rizzuto, R., et al. TMBIM3/GRINA is a novel unfolded protein response (UPR) target gene that controls apoptosis through the modulation of ER calcium homeostasis. *Cell death and differentiation* **2012**, *19*, 1013-1026, doi:10.1038/cdd.2011.189.
109. Cheng, W.; Guo, L.; Zhang, Z.; Soo, H.M.; Wen, C.; Wu, W.; Peng, J. HNF factors form a network to regulate liver-enriched genes in zebrafish. *Developmental biology* **2006**, *294*, 482-496, doi:10.1016/j.ydbio.2006.03.018.
110. Henke, K.; Daane, J.M.; Hawkins, M.B.; Dooley, C.M.; Busch-Nentwich, E.M.; Stemple, D.L.; Harris, M.P. Genetic Screen for Postembryonic Development in the Zebrafish (*Danio rerio*): Dominant Mutations Affecting Adult Form. *Genetics* **2017**, *207*, 609-623, doi:10.1534/genetics.117.300187.
111. Petko, J.A.; Kabbani, N.; Frey, C.; Woll, M.; Hickey, K.; Craig, M.; Canfield, V.A.; Levenson, R. Proteomic and functional analysis of NCS-1 binding proteins reveals novel signaling pathways required for inner ear development in zebrafish. *BMC neuroscience* **2009**, *10*, 27, doi:10.1186/1471-2202-10-27.
112. Choksi, S.P.; Babu, D.; Lau, D.; Yu, X.; Roy, S. Systematic discovery of novel ciliary genes through functional genomics in the zebrafish. *Development* **2014**, *141*, 3410-3419, doi:10.1242/dev.108209.
113. Tsai, C.T.; Hsieh, C.S.; Chang, S.N.; Chuang, E.Y.; Ueng, K.C.; Tsai, C.F.; Lin, T.H.; Wu, C.K.; Lee, J.K.; Lin, L.Y., et al. Genome-wide screening identifies a KCNIP1 copy number variant as a genetic predictor for atrial fibrillation. *Nature communications* **2016**, *7*, 10190, doi:10.1038/ncomms10190.
114. Stetsyuk, V.; Peers, B.; Mavropoulos, A.; Verbruggen, V.; Thisse, B.; Thisse, C.; Motte, P.; Duvillie, B.; Scharfmann, R. Calsenilin is required for endocrine pancreas development in zebrafish. *Developmental dynamics : an official publication of the American Association of Anatomists* **2007**, *236*, 1517-1525, doi:10.1002/dvdy.21149.
115. Rohmann, K.N.; Tripp, J.A.; Genova, R.M.; Bass, A.H. Manipulation of BK channel expression is sufficient to alter auditory hair cell thresholds in larval zebrafish. *The Journal of experimental biology* **2014**, *217*, 2531-2539, doi:10.1242/jeb.103093.
116. Cabo, R.; Zichichi, R.; Vina, E.; Guerrera, M.C.; Vazquez, G.; Garcia-Suarez, O.; Vega, J.A.; Germana, A. Calcium-activated potassium channel SK1 is widely expressed in the peripheral nervous system and sensory organs of adult zebrafish. *Neuroscience letters* **2013**, *555*, 62-67, doi:10.1016/j.neulet.2013.09.026.
117. Chen, C.H.; Sun, Y.H.; Pei, D.S.; Zhu, Z.Y. Comparative expression of zebrafish lats1 and lats2 and their implication in gastrulation movements. *Developmental dynamics : an official publication of the American Association of Anatomists* **2009**, *238*, 2850-2859, doi:10.1002/dvdy.22105.
118. Zhou, Y.; Cashman, T.J.; Nevis, K.R.; Obregon, P.; Carney, S.A.; Liu, Y.; Gu, A.; Mosimann, C.; Sondalle, S.; Peterson, R.E., et al. Latent TGF-beta binding protein 3 identifies a second heart field in zebrafish. *Nature* **2011**, *474*, 645-648, doi:10.1038/nature10094.
119. Gays, D.; Hess, C.; Camporeale, A.; Ala, U.; Provero, P.; Mosimann, C.; Santoro, M.M. An exclusive cellular and molecular network governs intestinal smooth muscle cell differentiation in vertebrates. *Development (Cambridge, England)* **2017**, *144*, 464-478, doi:10.1242/dev.133926.
120. Nevis, K.; Obregon, P.; Walsh, C.; Guner-Ataman, B.; Burns, C.G.; Burns, C.E. Tbx1 is required for second heart field proliferation in zebrafish. *Developmental dynamics : an official publication of the American Association of Anatomists* **2013**, *242*, 550-559, doi:10.1002/dvdy.23928.
121. Kao, R.M.; Rurik, J.G.; Farr, G.H., 3rd; Dong, X.R.; Majesky, M.W.; Maves, L. Pbx4 is Required for the Temporal Onset of Zebrafish Myocardial Differentiation. *Journal of developmental biology* **2015**, *3*, 93-111, doi:10.3390/jdb3040093.
122. Burrows, J.T.; Pearson, B.J.; Scott, I.C. An in vivo requirement for the mediator subunit med14 in the maintenance of stem cell populations. *Stem cell reports* **2015**, *4*, 670-684, doi:10.1016/j.stemcr.2015.02.006.
123. Jahangiri, L.; Sharpe, M.; Novikov, N.; Gonzalez-Rosa, J.M.; Borikova, A.; Nevis, K.; Paffett-Lugassy, N.; Zhao, L.; Adams, M.; Guner-Ataman, B., et al. The AP-1 transcription factor component Fosl2 potentiates the rate of myocardial differentiation from the zebrafish second heart field. *Development (Cambridge, England)* **2016**, *143*, 113-122, doi:10.1242/dev.126136.

124. Johnson, H.J.; Gandhi, M.J.; Shafizadeh, E.; Langer, N.B.; Pierce, E.L.; Paw, B.H.; Gilligan, D.M.; Drachman, J.G. In vivo inactivation of MASTL kinase results in thrombocytopenia. *Experimental hematology* **2009**, *37*, 901-908, doi:10.1016/j.exphem.2009.05.005.
125. Prudent, J.; Popgeorgiev, N.; Bonneau, B.; Thibaut, J.; Gadet, R.; Lopez, J.; Gonzalo, P.; Rimokh, R.; Manon, S.; Houart, C., et al. Bcl-wav and the mitochondrial calcium uniporter drive gastrula morphogenesis in zebrafish. *Nature communications* **2013**, *4*, 2330, doi:10.1038/ncomms3330.
126. Soman, S.; Keatinge, M.; Moein, M.; Da Costa, M.; Mortiboys, H.; Skupin, A.; Sugunan, S.; Bazala, M.; Kuznicki, J.; Bandmann, O. Inhibition of the mitochondrial calcium uniporter rescues dopaminergic neurons in pink1(-/-) zebrafish. *The European journal of neuroscience* **2017**, *45*, 528-535, doi:10.1111/ejn.13473.
127. Shimizu, H.; Schredelseker, J.; Huang, J.; Lu, K.; Naghdi, S.; Lu, F.; Franklin, S.; Fiji, H.D.; Wang, K.; Zhu, H., et al. Mitochondrial Ca(2+) uptake by the voltage-dependent anion channel 2 regulates cardiac rhythmicity. *eLife* **2015**, *4*, doi:10.7554/eLife.04801.
128. Chen, Z.; Huang, W.; Dahme, T.; Rottbauer, W.; Ackerman, M.J.; Xu, X. Depletion of zebrafish essential and regulatory myosin light chains reduces cardiac function through distinct mechanisms. *Cardiovascular research* **2008**, *79*, 97-108, doi:10.1093/cvr/cvn073.
129. Jackson, H.E.; Ono, Y.; Wang, X.; Elworthy, S.; Cunliffe, V.T.; Ingham, P.W. The role of Sox6 in zebrafish muscle fiber type specification. *Skeletal muscle* **2015**, *5*, 2, doi:10.1186/s13395-014-0026-2.
130. Seguchi, O.; Takashima, S.; Yamazaki, S.; Asakura, M.; Asano, Y.; Shintani, Y.; Wakeno, M.; Minamino, T.; Kondo, H.; Furukawa, H., et al. A cardiac myosin light chain kinase regulates sarcomere assembly in the vertebrate heart. *The Journal of clinical investigation* **2007**, *117*, 2812-2824, doi:10.1172/JCI30804.
131. Feng, S.; Wang, S.; Wang, Y.; Yang, Q.; Wang, D.; Li, H. Identification and expression of carbonic anhydrase 2, myosin regulatory light chain 2 and selenium-binding protein 1 in zebrafish Danio rerio: Implication for age-related biomarkers. *Gene expression patterns : GEP* **2018**, *29*, 47-58, doi:10.1016/j.gep.2018.04.007.
132. Stainier, D.Y.; Fouquet, B.; Chen, J.N.; Warren, K.S.; Weinstein, B.M.; Meiler, S.E.; Mohideen, M.A.; Neuhauss, S.C.; Solnica-Krezel, L.; Schier, A.F., et al. Mutations affecting the formation and function of the cardiovascular system in the zebrafish embryo. *Development (Cambridge, England)* **1996**, *123*, 285-292.
133. Matsui, T.; Thitamadee, S.; Murata, T.; Kakinuma, H.; Nabetani, T.; Hirabayashi, Y.; Hirate, Y.; Okamoto, H.; Bessho, Y. Canopy1, a positive feedback regulator of FGF signaling, controls progenitor cell clustering during Kupffer's vesicle organogenesis. *Proceedings of the National Academy of Sciences of the United States of America* **2011**, *108*, 9881-9886, doi:10.1073/pnas.1017248108.
134. Ding, Y.; Liu, W.; Deng, Y.; Jomok, B.; Yang, J.; Huang, W.; Clark, K.J.; Zhong, T.P.; Lin, X.; Ekker, S.C., et al. Trapping cardiac recessive mutants via expression-based insertional mutagenesis screening. *Circulation research* **2013**, *112*, 606-617, doi:10.1161/circresaha.112.300603.
135. Missinato, M.A.; Tobita, K.; Romano, N.; Carroll, J.A.; Tsang, M. Extracellular component hyaluronic acid and its receptor Hmmer are required for epicardial EMT during heart regeneration. *Cardiovascular research* **2015**, *107*, 487-498, doi:10.1093/cvr/cvv190.
136. El-Rass, S.; Eisa-Beygi, S.; Khong, E.; Brand-Arzamendi, K.; Mauro, A.; Zhang, H.; Clark, K.J.; Ekker, S.C.; Wen, X.Y. Disruption of pdgfra alters endocardial and myocardial fusion during zebrafish cardiac assembly. *Biology open* **2017**, *6*, 348-357, doi:10.1242/bio.021212.
137. Chiba, A.; Watanabe-Takano, H.; Terai, K.; Fukui, H.; Miyazaki, T.; Uemura, M.; Hashimoto, H.; Hibi, M.; Fukuhara, S.; Mochizuki, N. Osteocrin, a peptide secreted from the heart and other tissues, contributes to cranial osteogenesis and chondrogenesis in zebrafish. *Development (Cambridge, England)* **2017**, *144*, 334-344, doi:10.1242/dev.143354.
138. Chang, H.W.; Wang, W.D.; Chiu, C.C.; Chen, C.H.; Wang, Y.S.; Chen, Z.Y.; Liu, W.; Tai, M.H.; Wen, Z.H.; Wu, C.Y. Ftr82 Is Critical for Vascular Patterning during Zebrafish Development. *International journal of molecular sciences* **2017**, *18*, doi:10.3390/ijms18010156.
139. Bloomekatz, J.; Singh, R.; Prall, O.W.; Dunn, A.C.; Vaughan, M.; Loo, C.S.; Harvey, R.P.; Yelon, D. Platelet-derived growth factor (PDGF) signaling directs cardiomyocyte movement toward the midline during heart tube assembly. *eLife* **2017**, *6*, doi:10.7554/eLife.21172.
140. Tan, J.; Zhao, L.; Wang, G.; Li, T.; Li, D.; Xu, Q.; Chen, X.; Shang, Z.; Wang, J.; Zhou, J. Human MLL-AF9 Overexpression Induces Aberrant Hematopoietic Expansion in Zebrafish. *BioMed research international* **2018**, *2018*, 6705842, doi:10.1155/2018/6705842.
141. Guerra, A.; Germano, R.F.; Stone, O.; Arnaout, R.; Guenther, S.; Ahuja, S.; Uribe, V.; Vanhollebeke, B.; Stainier, D.Y.; Reischauer, S. Distinct myocardial lineages break atrial symmetry during cardiogenesis in zebrafish. *eLife* **2018**, *7*, doi:10.7554/eLife.32833.
142. Gomez, G.; Lee, J.H.; Veldman, M.B.; Lu, J.; Xiao, X.; Lin, S. Identification of vascular and hematopoietic genes downstream of etsrp by deep sequencing in zebrafish. *PLoS one* **2012**, *7*, e31658, doi:10.1371/journal.pone.0031658.
143. Yin, J.W.; Liang, Y.; Park, J.Y.; Chen, D.; Yao, X.; Xiao, Q.; Liu, Z.; Jiang, B.; Fu, Y.; Bao, M., et al. Mediator MED23 plays opposing roles in directing smooth muscle cell and adipocyte differentiation. *Genes & development* **2012**, *26*, 2192-2205, doi:10.1101/gad.192666.112.

144. Blasiole, B.; Kabbani, N.; Boehmler, W.; Thisse, B.; Thisse, C.; Canfield, V.; Levenson, R. Neuronal calcium sensor-1 gene ncs-1a is essential for semicircular canal formation in zebrafish inner ear. *Journal of neurobiology* **2005**, *64*, 285-297, doi:10.1002/neu.20138.
145. Kim, H.T.; Kim, E.H.; Yoo, K.W.; Lee, M.S.; Choi, J.H.; Park, H.C.; Yeo, S.Y.; Lee, D.S.; Kim, C.H. Isolation and expression analysis of Alzheimer's disease-related gene xb51 in zebrafish. *Developmental dynamics : an official publication of the American Association of Anatomists* **2008**, *237*, 3921-3926, doi:10.1002/dvdy.21806.
146. Weaver, C.J.; Leung, Y.F.; Suter, D.M. Expression dynamics of NADPH oxidases during early zebrafish development. *The Journal of comparative neurology* **2016**, *524*, 2130-2141, doi:10.1002/cne.23938.
147. Hatef, A.; Shajan, S.; Unniappan, S. Nutrient status modulates the expression of nesfatin-1 encoding nucleobindin 2A and 2B mRNAs in zebrafish gut, liver and brain. *General and comparative endocrinology* **2015**, *215*, 51-60, doi:10.1016/j.ygcen.2014.09.009.
148. Large-scale discovery of novel genetic causes of developmental disorders. *Nature* **2015**, *519*, 223-228, doi:10.1038/nature14135.
149. Piotrowski, T.; Schilling, T.F.; Brand, M.; Jiang, Y.J.; Heisenberg, C.P.; Beuchle, D.; Grandel, H.; van Eeden, F.J.; Furutani-Seiki, M.; Granato, M., et al. Jaw and branchial arch mutants in zebrafish II: anterior arches and cartilage differentiation. *Development (Cambridge, England)* **1996**, *123*, 345-356.
150. Kimmel, C.B.; Miller, C.T.; Kruze, G.; Ullmann, B.; BreMiller, R.A.; Larison, K.D.; Snyder, H.C. The shaping of pharyngeal cartilages during early development of the zebrafish. *Developmental biology* **1998**, *203*, 245-263, doi:10.1006/dbio.1998.9016.
151. Kimmel, C.B.; Ullmann, B.; Walker, M.; Miller, C.T.; Crump, J.G. Endothelin 1-mediated regulation of pharyngeal bone development in zebrafish. *Development (Cambridge, England)* **2003**, *130*, 1339-1351.
152. Walker, M.B.; Miller, C.T.; Swartz, M.E.; Eberhart, J.K.; Kimmel, C.B. phospholipase C, beta 3 is required for Endothelin1 regulation of pharyngeal arch patterning in zebrafish. *Developmental biology* **2007**, *304*, 194-207, doi:10.1016/j.ydbio.2006.12.027.
153. Amsterdam, A.; Nissen, R.M.; Sun, Z.; Swindell, E.C.; Farrington, S.; Hopkins, N. Identification of 315 genes essential for early zebrafish development. *Proceedings of the National Academy of Sciences of the United States of America* **2004**, *101*, 12792-12797, doi:10.1073/pnas.0403929101.
154. Covassin, L.D.; Siekmann, A.F.; Kacergis, M.C.; Laver, E.; Moore, J.C.; Villefranc, J.A.; Weinstein, B.M.; Lawson, N.D. A genetic screen for vascular mutants in zebrafish reveals dynamic roles for Vegf/Plcg1 signaling during artery development. *Developmental biology* **2009**, *329*, 212-226, doi:10.1016/j.ydbio.2009.02.031.
155. Burns, C.E.; Galloway, J.L.; Smith, A.C.; Keefe, M.D.; Cashman, T.J.; Paik, E.J.; Mayhall, E.A.; Amsterdam, A.H.; Zon, L.I. A genetic screen in zebrafish defines a hierarchical network of pathways required for hematopoietic stem cell emergence. *Blood* **2009**, *113*, 5776-5782, doi:10.1182/blood-2008-12-193607.
156. Zygmunt, T.; Gay, C.M.; Blondelle, J.; Singh, M.K.; Flaherty, K.M.; Means, P.C.; Herwig, L.; Krudewig, A.; Belting, H.G.; Affolter, M., et al. Semaphorin-PlexinD1 signaling limits angiogenic potential via the VEGF decoy receptor sFlt1. *Developmental cell* **2011**, *21*, 301-314, doi:10.1016/j.devcel.2011.06.033.
157. Jing, C.B.; Chen, Y.; Dong, M.; Peng, X.L.; Jia, X.E.; Gao, L.; Ma, K.; Deng, M.; Liu, T.X.; Zon, L.I., et al. Phospholipase C gamma-1 is required for granulocyte maturation in zebrafish. *Developmental biology* **2013**, *374*, 24-31, doi:10.1016/j.ydbio.2012.11.032.
158. Buhrdel, J.B.; Hirth, S.; Kessler, M.; Westphal, S.; Forster, M.; Manta, L.; Wiche, G.; Schoser, B.; Schessl, J.; Schroder, R., et al. In vivo characterization of human myofibrillar myopathy genes in zebrafish. *Biochemical and biophysical research communications* **2015**, *461*, 217-223, doi:10.1016/j.bbrc.2015.03.149.
159. Chen, J.; Zhu, R.F.; Li, F.F.; Liang, Y.L.; Wang, C.; Qin, Y.W.; Huang, S.; Zhao, X.X.; Jing, Q. MicroRNA-126a Directs Lymphangiogenesis Through Interacting With Chemokine and Flt4 Signaling in Zebrafish. *Arteriosclerosis, thrombosis, and vascular biology* **2016**, *36*, 2381-2393, doi:10.1161/atvbaha.116.308120.
160. Rottbauer, W.; Just, S.; Wessels, G.; Trano, N.; Most, P.; Katus, H.A.; Fishman, M.C. VEGF-PLCgamma1 pathway controls cardiac contractility in the embryonic heart. *Genes & development* **2005**, *19*, 1624-1634, doi:10.1101/gad.1319405.
161. Ma, A.C.; Liang, R.; Leung, A.Y. The role of phospholipase C gamma 1 in primitive hematopoiesis during zebrafish development. *Experimental hematology* **2007**, *35*, 368-373, doi:10.1016/j.exphem.2006.11.010.
162. Takada, N.; Appel, B. Identification of genes expressed by zebrafish oligodendrocytes using a differential microarray screen. *Developmental dynamics : an official publication of the American Association of Anatomists* **2010**, *239*, 2041-2047, doi:10.1002/dvdy.22338.
163. Kalen, M.; Wallgard, E.; Asker, N.; Nasevicius, A.; Athley, E.; Billgren, E.; Larson, J.D.; Wadman, S.A.; Norseng, E.; Clark, K.J., et al. Combination of reverse and chemical genetic screens reveals angiogenesis inhibitors and targets. *Chemistry & biology* **2009**, *16*, 432-441, doi:10.1016/j.chembiol.2009.02.010.
164. Bedell, V.M.; Wang, Y.; Campbell, J.M.; Poshusta, T.L.; Starker, C.G.; Krug, R.G., 2nd; Tan, W.; Penheiter, S.G.; Ma, A.C.; Leung, A.Y., et al. In vivo genome editing using a high-efficiency TALEN system. *Nature* **2012**, *491*, 114-118, doi:10.1038/nature11537.

165. Huang, H.; Ruan, H.; Aw, M.Y.; Hussain, A.; Guo, L.; Gao, C.; Qian, F.; Leung, T.; Song, H.; Kimelman, D., et al. Mypt1-mediated spatial positioning of Bmp2-producing cells is essential for liver organogenesis. *Development (Cambridge, England)* **2008**, *135*, 3209-3218, doi:10.1242/dev.024406.
166. Jayashankar, V.; Nguyen, M.J.; Carr, B.W.; Zheng, D.C.; Rosales, J.B.; Weiser, D.C. Protein phosphatase 1 beta paralogs encode the zebrafish myosin phosphatase catalytic subunit. *PLoS one* **2013**, *8*, e75766, doi:10.1371/journal.pone.0075766.
167. Haug, M.F.; Gesemann, M.; Berger, M.; Neuhauss, S.C.F. Phylogeny and distribution of protein kinase C variants in the zebrafish. *The Journal of comparative neurology* **2018**, *526*, 1097-1109, doi:10.1002/cne.24395.
168. Eckfeldt, C.E.; Mendenhall, E.M.; Flynn, C.M.; Wang, T.F.; Pickart, M.A.; Grindle, S.M.; Ekker, S.C.; Verfaillie, C.M. Functional analysis of human hematopoietic stem cell gene expression using zebrafish. *PLoS biology* **2005**, *3*, e254, doi:10.1371/journal.pbio.0030254.
169. Williams, C.M.; Feng, Y.; Martin, P.; Poole, A.W. Protein kinase C alpha and beta are positive regulators of thrombus formation in vivo in a zebrafish (*Danio rerio*) model of thrombosis. *Journal of thrombosis and haemostasis : JTH* **2011**, *9*, 2457-2465, doi:10.1111/j.1538-7836.2011.04520.x.
170. Patten, S.A.; Sihra, R.K.; Dhami, K.S.; Coutts, C.A.; Ali, D.W. Differential expression of PKC isoforms in developing zebrafish. *International journal of developmental neuroscience : the official journal of the International Society for Developmental Neuroscience* **2007**, *25*, 155-164, doi:10.1016/j.ijdevneu.2007.02.003.
171. Nakaya, N.; Lee, H.S.; Takada, Y.; Tzchori, I.; Tomarev, S.I. Zebrafish olfactomedin 1 regulates retinal axon elongation in vivo and is a modulator of Wnt signaling pathway. *The Journal of neuroscience : the official journal of the Society for Neuroscience* **2008**, *28*, 7900-7910, doi:10.1523/jneurosci.0617-08.2008.
172. Schiffer, M.; Teng, B.; Gu, C.; Shchedrina, V.A.; Kasaikina, M.; Pham, V.A.; Hanke, N.; Rong, S.; Gueler, F.; Schroder, P., et al. Pharmacological targeting of actin-dependent dynamin oligomerization ameliorates chronic kidney disease in diverse animal models. *Nature medicine* **2015**, *21*, 601-609, doi:10.1038/nm.3843.
173. Patten, S.A.; Roy, B.; Cunningham, M.E.; Stafford, J.L.; Ali, D.W. Protein kinase Cgamma is a signaling molecule required for the developmental speeding of alpha-amino-3-hydroxyl-5-methyl-4-isoxazole-propionate receptor kinetics. *The European journal of neuroscience* **2010**, *31*, 1561-1573, doi:10.1111/j.1460-9568.2010.07216.x.
174. Patten, S.A.; Ali, D.W. PKCgamma-induced trafficking of AMPA receptors in embryonic zebrafish depends on NSF and PICK1. *Proceedings of the National Academy of Sciences of the United States of America* **2009**, *106*, 6796-6801, doi:10.1073/pnas.0811171106.
175. Malicki, J.; Neuhauss, S.C.; Schier, A.F.; Solnica-Krezel, L.; Stemple, D.L.; Stainier, D.Y.; Abdelilah, S.; Zwartkruis, F.; Rangini, Z.; Driever, W. Mutations affecting development of the zebrafish retina. *Development (Cambridge, England)* **1996**, *123*, 263-273.
176. Cui, S.; Otten, C.; Rohr, S.; Abdelilah-Seyfried, S.; Link, B.A. Analysis of aPKClambda and aPKCzeta reveals multiple and redundant functions during vertebrate retinogenesis. *Molecular and cellular neurosciences* **2007**, *34*, 431-444, doi:10.1016/j.mcn.2006.11.016.
177. Baye, L.M.; Link, B.A. Interkinetic nuclear migration and the selection of neurogenic cell divisions during vertebrate retinogenesis. *The Journal of neuroscience : the official journal of the Society for Neuroscience* **2007**, *27*, 10143-10152, doi:10.1523/jneurosci.2754-07.2007.
178. Sakaguchi, T.F.; Sadler, K.C.; Crosnier, C.; Stainier, D.Y. Endothelial signals modulate hepatocyte apicobasal polarization in zebrafish. *Current biology : CB* **2008**, *18*, 1565-1571, doi:10.1016/j.cub.2008.08.065.
179. Rohr, S.; Otten, C.; Abdelilah-Seyfried, S. Asymmetric involution of the myocardial field drives heart tube formation in zebrafish. *Circulation research* **2008**, *102*, e12-19, doi:10.1161/circresaha.107.165241.
180. Ohata, S.; Aoki, R.; Kinoshita, S.; Yamaguchi, M.; Tsuruoka-Kinoshita, S.; Tanaka, H.; Wada, H.; Watabe, S.; Tsuboi, T.; Masai, I., et al. Dual roles of Notch in regulation of apically restricted mitosis and apicobasal polarity of neuroepithelial cells. *Neuron* **2011**, *69*, 215-230, doi:10.1016/j.neuron.2010.12.026.
181. Wiweger, M.I.; Zhao, Z.; van Merkesteyn, R.J.; Roehl, H.H.; Hogendoorn, P.C. HSPG-deficient zebrafish uncovers dental aspect of multiple osteochondromas. *PLoS one* **2012**, *7*, e29734, doi:10.1371/journal.pone.0029734.
182. Hudish, L.I.; Blasky, A.J.; Appel, B. miR-219 regulates neural precursor differentiation by direct inhibition of apical par polarity proteins. *Developmental cell* **2013**, *27*, 387-398, doi:10.1016/j.devcel.2013.10.015.
183. Krock, B.L.; Perkins, B.D. The Par-PrkC polarity complex is required for cilia growth in zebrafish photoreceptors. *PLoS one* **2014**, *9*, e104661, doi:10.1371/journal.pone.0104661.
184. Gerlach, G.F.; Wingert, R.A. Zebrafish pronephros tubulogenesis and epithelial identity maintenance are reliant on the polarity proteins PrkC iota and zeta. *Developmental biology* **2014**, *396*, 183-200, doi:10.1016/j.ydbio.2014.08.038.
185. Raman, R.; Damle, I.; Rote, R.; Banerjee, S.; Dingare, C.; Sonawane, M. aPKC regulates apical localization of Lgl to restrict elongation of microridges in developing zebrafish epidermis. *Nature communications* **2016**, *7*, 11643, doi:10.1038/ncomms11643.

186. Hava, D.; Forster, U.; Matsuda, M.; Cui, S.; Link, B.A.; Eichhorst, J.; Wiesner, B.; Chitnis, A.; Abdelilah-Seyfried, S. Apical membrane maturation and cellular rosette formation during morphogenesis of the zebrafish lateral line. *Journal of cell science* **2009**, *122*, 687-695, doi:10.1242/jcs.032102.
187. Bit-Avragim, N.; Rohr, S.; Rudolph, F.; Van der Ven, P.; Furst, D.; Eichhorst, J.; Wiesner, B.; Abdelilah-Seyfried, S. Nuclear localization of the zebrafish tight junction protein nagie oko. *Developmental dynamics : an official publication of the American Association of Anatomists* **2008**, *237*, 83-90, doi:10.1002/dvdy.21389.
188. Panizzi, J.R.; Jessen, J.R.; Drummond, I.A.; Solnica-Krezel, L. New functions for a vertebrate Rho guanine nucleotide exchange factor in ciliated epithelia. *Development (Cambridge, England)* **2007**, *134*, 921-931, doi:10.1242/dev.02776.
189. Park, H.C.; Shin, J.; Roberts, R.K.; Appel, B. An olig2 reporter gene marks oligodendrocyte precursors in the postembryonic spinal cord of zebrafish. *Developmental dynamics : an official publication of the American Association of Anatomists* **2007**, *236*, 3402-3407, doi:10.1002/dvdy.21365.
190. Hsu, Y.C.; Willoughby, J.J.; Christensen, A.K.; Jensen, A.M. Mosaic Eyes is a novel component of the Crumbs complex and negatively regulates photoreceptor apical size. *Development (Cambridge, England)* **2006**, *133*, 4849-4859, doi:10.1242/dev.02685.
191. Oubaha, M.; Lin, M.I.; Margaron, Y.; Fillion, D.; Price, E.N.; Zon, L.I.; Cote, J.F.; Gratton, J.P. Formation of a PKCzeta/beta-catenin complex in endothelial cells promotes angiopoietin-1-induced collective directional migration and angiogenic sprouting. *Blood* **2012**, *120*, 3371-3381, doi:10.1182/blood-2012-03-419721.
192. Zigman, M.; Trinh le, A.; Fraser, S.E.; Moens, C.B. Zebrafish neural tube morphogenesis requires Scribble-dependent oriented cell divisions. *Current biology : CB* **2011**, *21*, 79-86, doi:10.1016/j.cub.2010.12.005.
193. Recher, G.; Jouralet, J.; Brombin, A.; Heuze, A.; Mugniery, E.; Hermel, J.M.; Desnoullez, S.; Savy, T.; Herbomel, P.; Bourrat, F., et al. Zebrafish midbrain slow-amplifying progenitors exhibit high levels of transcripts for nucleotide and ribosome biogenesis. *Development (Cambridge, England)* **2013**, *140*, 4860-4869, doi:10.1242/dev.099010.
194. Jung, J.J.; Inamdar, S.M.; Tiwari, A.; Ye, D.; Lin, F.; Choudhury, A. Syntaxin 16 regulates lumen formation during epithelial morphogenesis. *PLoS one* **2013**, *8*, e61857, doi:10.1371/journal.pone.0061857.
195. Fitzpatrick, P.; Shattil, S.J.; Ablooglu, A.J. C-terminal COOH of integrin beta1 is necessary for beta1 association with the kindlin-2 adapter protein. *The Journal of biological chemistry* **2014**, *289*, 11183-11193, doi:10.1074/jbc.M113.535369.
196. Nery, L.R.; Silva, N.E.; Fonseca, R.; Vianna, M.R.M. Presenilin-1 Targeted Morpholino Induces Cognitive Deficits, Increased Brain Abeta1-42 and Decreased Synaptic Marker PSD-95 in Zebrafish Larvae. *Neurochemical research* **2017**, *42*, 2959-2967, doi:10.1007/s11064-017-2327-4.
197. Sundvik, M.; Chen, Y.C.; Panula, P. Presenilin1 regulates histamine neuron development and behavior in zebrafish, danio rerio. *The Journal of neuroscience : the official journal of the Society for Neuroscience* **2013**, *33*, 1589-1597, doi:10.1523/JNEUROSCI.1802-12.2013.
198. Geudens, I.; Herpers, R.; Hermans, K.; Segura, I.; Ruiz de Almodovar, C.; Bussmann, J.; De Smet, F.; Vandeveld, W.; Hogan, B.M.; Siekmann, A., et al. Role of delta-like-4/Notch in the formation and wiring of the lymphatic network in zebrafish. *Arteriosclerosis, thrombosis, and vascular biology* **2010**, *30*, 1695-1702, doi:10.1161/ATVBAHA.110.203034.
199. Nornes, S.; Newman, M.; Wells, S.; Verdile, G.; Martins, R.N.; Lardelli, M. Independent and cooperative action of Psen2 with Psen1 in zebrafish embryos. *Experimental cell research* **2009**, *315*, 2791-2801, doi:10.1016/j.yexcr.2009.06.023.
200. Lee, J.; Peterson, S.M.; Freeman, J.L. Alzheimer's disease risk genes in wild-type adult zebrafish exhibit gender-specific expression changes during aging. *Neurogenetics* **2016**, *17*, 197-199, doi:10.1007/s10048-016-0485-1.
201. Nornes, S.; Groth, C.; Camp, E.; Ey, P.; Lardelli, M. Developmental control of Presenilin1 expression, endoproteolysis, and interaction in zebrafish embryos. *Experimental cell research* **2003**, *289*, 124-132.
202. Groth, C.; Nornes, S.; McCarty, R.; Tamme, R.; Lardelli, M. Identification of a second presenilin gene in zebrafish with similarity to the human Alzheimer's disease gene presenilin2. *Development genes and evolution* **2002**, *212*, 486-490, doi:10.1007/s00427-002-0269-5.
203. Moussavi Nik, S.H.; Wilson, L.; Newman, M.; Croft, K.; Mori, T.A.; Musgrave, I.; Lardelli, M. The BACE1-PSEN-AbetaPP regulatory axis has an ancient role in response to low oxygen/oxidative stress. *Journal of Alzheimer's disease : JAD* **2012**, *28*, 515-530, doi:10.3233/jad-2011-110533.
204. Shih, Y.H.; Zhang, Y.; Ding, Y.; Ross, C.A.; Li, H.; Olson, T.M.; Xu, X. Cardiac transcriptome and dilated cardiomyopathy genes in zebrafish. *Circulation. Cardiovascular genetics* **2015**, *8*, 261-269, doi:10.1161/CIRCGENETICS.114.000702.
205. Lee, J.; Peterson, S.M.; Freeman, J.L. Alzheimer's disease risk genes in wild-type adult zebrafish exhibit gender-specific expression changes during aging. In *Neurogenetics*, United States, 2016; Vol. 17, pp. 197-199.

206. Hortopan, G.A.; Dinday, M.T.; Baraban, S.C. Spontaneous seizures and altered gene expression in GABA signaling pathways in a mind bomb mutant zebrafish. *The Journal of neuroscience : the official journal of the Society for Neuroscience* **2010**, *30*, 13718-13728, doi:10.1523/jneurosci.1887-10.2010.
207. Huang, M.S.; Wang, T.K.; Liu, Y.W.; Li, Y.T.; Chi, T.H.; Chou, C.W.; Hsieh, M. Roles of carbonic anhydrase 8 in neuronal cells and zebrafish. *Biochimica et biophysica acta* **2014**, *1840*, 2829-2842, doi:10.1016/j.bbagen.2014.04.017.
208. Kyostila, K.; Syrja, P.; Jagannathan, V.; Chandrasekar, G.; Jokinen, T.S.; Seppala, E.H.; Becker, D.; Drogemuller, M.; Dietschi, E.; Drogemuller, C., et al. A missense change in the ATG4D gene links aberrant autophagy to a neurodegenerative vacuolar storage disease. *PLoS genetics* **2015**, *11*, e1005169, doi:10.1371/journal.pgen.1005169.
209. Hsiao, C.D.; Tsai, W.Y.; Tsai, H.J. Isolation and expression of two zebrafish homologues of parvalbumin genes related to chicken CPV3 and mammalian oncomodulin. *Mechanisms of development* **2002**, *119 Suppl 1*, S161-166.
210. Yang, L.; Keadjoug, J.R.; Zinsmeister, C.; Bauer, M.; Legradi, J.; Muller, F.; Pankratz, M.; Jakel, J.; Strahle, U. Transcriptional profiling reveals barcode-like toxicogenomic responses in the zebrafish embryo. *Genome biology* **2007**, *8*, R227, doi:10.1186/gb-2007-8-10-r227.
211. Cannon, J.E.; Place, E.S.; Eve, A.M.; Bradshaw, C.R.; Sesay, A.; Morrell, N.W.; Smith, J.C. Global analysis of the haematopoietic and endothelial transcriptome during zebrafish development. *Mechanisms of development* **2013**, *130*, 122-131, doi:10.1016/j.mod.2012.10.002.
212. Jurynek, M.J.; Xia, R.; Mackrill, J.J.; Gunther, D.; Crawford, T.; Flanigan, K.M.; Abramson, J.J.; Howard, M.T.; Grunwald, D.J. Selenoprotein N is required for ryanodine receptor calcium release channel activity in human and zebrafish muscle. *Proceedings of the National Academy of Sciences of the United States of America* **2008**, *105*, 12485-12490, doi:10.1073/pnas.0806015105.
213. Little, A.G.; Seebacher, F. Thyroid hormone regulates muscle function during cold acclimation in zebrafish (*Danio rerio*). *The Journal of experimental biology* **2013**, *216*, 3514-3521, doi:10.1242/jeb.089136.
214. Wu, H.H.; Brennan, C.; Ashworth, R. Ryanodine receptors, a family of intracellular calcium ion channels, are expressed throughout early vertebrate development. *BMC research notes* **2011**, *4*, 541, doi:10.1186/1756-0500-4-541.
215. Naganawa, Y.; Hirata, H. Developmental transition of touch response from slow muscle-mediated coilings to fast muscle-mediated burst swimming in zebrafish. *Developmental biology* **2011**, *355*, 194-204, doi:10.1016/j.ydbio.2011.04.027.
216. Hirata, H.; Wen, H.; Kawakami, Y.; Naganawa, Y.; Ogino, K.; Yamada, K.; Saint-Amant, L.; Low, S.E.; Cui, W.W.; Zhou, W., et al. Connexin 39.9 protein is necessary for coordinated activation of slow-twitch muscle and normal behavior in zebrafish. *The Journal of biological chemistry* **2012**, *287*, 1080-1089, doi:10.1074/jbc.M111.308205.
217. Hirata, H.; Watanabe, T.; Hatakeyama, J.; Sprague, S.M.; Saint-Amant, L.; Nagashima, A.; Cui, W.W.; Zhou, W.; Kuwada, J.Y. Zebrafish relatively relaxed mutants have a ryanodine receptor defect, show slow swimming and provide a model of multi-minicore disease. *Development (Cambridge, England)* **2007**, *134*, 2771-2781, doi:10.1242/dev.004531.
218. Dowling, J.J.; Arbogast, S.; Hur, J.; Nelson, D.D.; McEvoy, A.; Waugh, T.; Marty, I.; Lunardi, J.; Brooks, S.V.; Kuwada, J.Y., et al. Oxidative stress and successful antioxidant treatment in models of RYR1-related myopathy. *Brain : a journal of neurology* **2012**, *135*, 1115-1127, doi:10.1093/brain/aws036.
219. Francescatto, L.; Rothschild, S.C.; Myers, A.L.; Tombes, R.M. The activation of membrane targeted CaMK-II in the zebrafish Kupffer's vesicle is required for left-right asymmetry. *Development* **2010**, *137*, 2753-2762, doi:10.1242/dev.049627.
220. Darbandi, S.; Franck, J.P. A comparative study of ryanodine receptor (RyR) gene expression levels in a basal ray-finned fish, bichir (*Polypterus ornatipinnis*) and the derived euteleost zebrafish (*Danio rerio*). *Comparative biochemistry and physiology. Part B, Biochemistry & molecular biology* **2009**, *154*, 443-448, doi:10.1016/j.cbpb.2009.09.003.
221. Germana, A.; Marino, F.; Guerrero, M.C.; Campo, S.; de Girolamo, P.; Montalbano, G.; Germana, G.P.; Ochoa-Erena, F.J.; Ciriaco, E.; Vega, J.A. Expression and distribution of S100 protein in the nervous system of the adult zebrafish (*Danio rerio*). *Microscopy research and technique* **2008**, *71*, 248-255, doi:10.1002/jemt.20544.
222. Kraemer, A.M.; Saraiva, L.R.; Korsching, S.I. Structural and functional diversification in the teleost S100 family of calcium-binding proteins. *BMC evolutionary biology* **2008**, *8*, 48, doi:10.1186/1471-2148-8-48.
223. Deciphering Developmental Disorders, S. Large-scale discovery of novel genetic causes of developmental disorders. *Nature* **2015**, *519*, 223-228, doi:10.1038/nature14135.
224. Amali, A.A.; Lin, C.J.; Chen, Y.H.; Wang, W.L.; Gong, H.Y.; Rekha, R.D.; Lu, J.K.; Chen, T.T.; Wu, J.L. Overexpression of Myostatin2 in zebrafish reduces the expression of dystrophin associated protein complex (DAPC) which leads to muscle dystrophy. *Journal of biomedical science* **2008**, *15*, 595-604, doi:10.1007/s11373-008-9250-2.
225. Vogel, B.; Meder, B.; Just, S.; Laufer, C.; Berger, I.; Weber, S.; Katus, H.A.; Rottbauer, W. In-vivo characterization of human dilated cardiomyopathy genes in zebrafish. *Biochemical and biophysical research communications* **2009**, *390*, 516-522, doi:10.1016/j.bbrc.2009.09.129.



226. Guyon, J.R.; Mosley, A.N.; Jun, S.J.; Montanaro, F.; Steffen, L.S.; Zhou, Y.; Nigro, V.; Zon, L.I.; Kunkel, L.M. Delta-sarcoglycan is required for early zebrafish muscle organization. *Experimental cell research* **2005**, *304*, 105-115, doi:10.1016/j.yexcr.2004.10.032.
227. Cheng, L.; Guo, X.F.; Yang, X.Y.; Chong, M.; Cheng, J.; Li, G.; Gui, Y.H.; Lu, D.R. Delta-sarcoglycan is necessary for early heart and muscle development in zebrafish. *Biochemical and biophysical research communications* **2006**, *344*, 1290-1299, doi:10.1016/j.bbrc.2006.03.234.
228. Guyon, J.R.; Goswami, J.; Jun, S.J.; Thorne, M.; Howell, M.; Pusack, T.; Kawahara, G.; Steffen, L.S.; Galdzicki, M.; Kunkel, L.M. Genetic isolation and characterization of a splicing mutant of zebrafish dystrophin. *Human molecular genetics* **2009**, *18*, 202-211, doi:10.1093/hmg/ddn337.
229. Reischauer, S.; Levesque, M.P.; Nusslein-Volhard, C.; Sonawane, M. Lgl2 executes its function as a tumor suppressor by regulating ErbB signaling in the zebrafish epidermis. *PLoS genetics* **2009**, *5*, e1000720, doi:10.1371/journal.pgen.1000720.
230. Yang, L.; Ho, N.Y.; Muller, F.; Strahle, U. Methyl mercury suppresses the formation of the tail primordium in developing zebrafish embryos. *Toxicological sciences : an official journal of the Society of Toxicology* **2010**, *115*, 379-390, doi:10.1093/toxsci/kfq053.
231. Mouti, M.A.; Dee, C.; Coupland, S.E.; Hurlstone, A.F. Minimal contribution of ERK1/2-MAPK signalling towards the maintenance of oncogenic GNAQQ209P-driven uveal melanomas in zebrafish. *Oncotarget* **2016**, *7*, 39654-39670, doi:10.18632/oncotarget.9207.
232. Lamason, R.L.; Mohideen, M.A.; Mest, J.R.; Wong, A.C.; Norton, H.L.; Aros, M.C.; Jurynek, M.J.; Mao, X.; Humphreville, V.R.; Humbert, J.E., et al. SLC24A5, a putative cation exchanger, affects pigmentation in zebrafish and humans. *Science* **2005**, *310*, 1782-1786, doi:10.1126/science.1116238.
233. Grillo, A.S.; SantaMaria, A.M.; Kafina, M.D.; Cioffi, A.G.; Huston, N.C.; Han, M.; Seo, Y.A.; Yien, Y.Y.; Nardone, C.; Menon, A.V., et al. Restored iron transport by a small molecule promotes absorption and hemoglobinization in animals. *Science* **2017**, *356*, 608-616, doi:10.1126/science.aah3862.
234. Cooper, T.K.; Murray, K.N.; Spagnoli, S.; Spitsbergen, J.M. Primary intestinal and vertebral chordomas in laboratory zebrafish (*Danio rerio*). *Veterinary pathology* **2015**, *52*, 388-392, doi:10.1177/0300985814537531.
235. Shaw, G.C.; Cope, J.J.; Li, L.; Corson, K.; Hersey, C.; Ackermann, G.E.; Gwynn, B.; Lambert, A.J.; Wingert, R.A.; Traver, D., et al. Mitoferrin is essential for erythroid iron assimilation. *Nature* **2006**, *440*, 96-100, doi:10.1038/nature04512.
236. Nilsson, R.; Schultz, I.J.; Pierce, E.L.; Soltis, K.A.; Naranuntarat, A.; Ward, D.M.; Baughman, J.M.; Paradkar, P.N.; Kingsley, P.D.; Culotta, V.C., et al. Discovery of genes essential for heme biosynthesis through large-scale gene expression analysis. *Cell metabolism* **2009**, *10*, 119-130, doi:10.1016/j.cmet.2009.06.012.
237. Shamseldin, H.E.; Smith, L.L.; Kentab, A.; Alkhalidi, H.; Summers, B.; Alsedairy, H.; Xiong, Y.; Gupta, V.A.; Alkuraya, F.S. Mutation of the mitochondrial carrier SLC25A42 causes a novel form of mitochondrial myopathy in humans. *Human genetics* **2016**, *135*, 21-30, doi:10.1007/s00439-015-1608-8.
238. Shimizu, H.; Langenbacher, A.D.; Huang, J.; Wang, K.; Otto, G.; Geisler, R.; Wang, Y.; Chen, J.N. The Calcineurin-FoxO-MuRF1 signaling pathway regulates myofibril integrity in cardiomyocytes. *eLife* **2017**, *6*, doi:10.7554/eLife.27955.
239. Takeuchi, J.K.; Lou, X.; Alexander, J.M.; Sugizaki, H.; Delgado-Olguin, P.; Holloway, A.K.; Mori, A.D.; Wylie, J.N.; Munson, C.; Zhu, Y., et al. Chromatin remodelling complex dosage modulates transcription factor function in heart development. *Nature communications* **2011**, *2*, 187, doi:10.1038/ncomms1187.
240. Langenbacher, A.D.; Dong, Y.; Shu, X.; Choi, J.; Nicoll, D.A.; Goldhaber, J.I.; Philipson, K.D.; Chen, J.N. Mutation in sodium-calcium exchanger 1 (NCX1) causes cardiac fibrillation in zebrafish. *Proceedings of the National Academy of Sciences of the United States of America* **2005**, *102*, 17699-17704, doi:10.1073/pnas.0502679102.
241. Shu, X.; Huang, J.; Dong, Y.; Choi, J.; Langenbacher, A.; Chen, J.N. Na,K-ATPase alpha2 and Ncx4a regulate zebrafish left-right patterning. *Development (Cambridge, England)* **2007**, *134*, 1921-1930, doi:10.1242/dev.02851.
242. Doganli, C.; Kjaer-Sorensen, K.; Knoeckel, C.; Beck, H.C.; Nyengaard, J.R.; Honore, B.; Nissen, P.; Ribera, A.; Oxvig, C.; Lykke-Hartmann, K. The alpha2Na<sup>+</sup>/K<sup>+</sup>-ATPase is critical for skeletal and heart muscle function in zebrafish. *Journal of cell science* **2012**, *125*, 6166-6175, doi:10.1242/jcs.115808.
243. On, C.; Marshall, C.R.; Perry, S.F.; Le, H.D.; Yurkov, V.; Omelchenko, A.; Hnatowich, M.; Hryshko, L.V.; Tibbits, G.F. Characterization of zebrafish (*Danio rerio*) NCX4: a novel NCX with distinct electrophysiological properties. *American journal of physiology* **2009**, *296*, C173-181, doi:10.1152/ajpcell.00455.2008.
244. Abouzeid, H.; Boisset, G.; Favez, T.; Youssef, M.; Marzouk, I.; Shakankiry, N.; Bayoumi, N.; Descombes, P.; Agosti, C.; Munier, F.L., et al. Mutations in the SPARC-related modular calcium-binding protein 1 gene, SMOC1, cause waardenburg anophthalmia syndrome. *American journal of human genetics* **2011**, *88*, 92-98, doi:10.1016/j.ajhg.2010.12.002.
245. Bloch-Zupan, A.; Jamet, X.; Etard, C.; Laugel, V.; Muller, J.; Geoffroy, V.; Strauss, J.P.; Pelletier, V.; Marion, V.; Poch, O., et al. Homozygosity mapping and candidate prioritization identify mutations, missed by whole-exome sequencing, in SMOC2, causing major dental developmental defects. *American journal of human genetics* **2011**, *89*, 773-781, doi:10.1016/j.ajhg.2011.11.002.

246. Melvin, V.S.; Feng, W.; Hernandez-Lagunas, L.; Artinger, K.B.; Williams, T. A morpholino-based screen to identify novel genes involved in craniofacial morphogenesis. *Developmental dynamics : an official publication of the American Association of Anatomists* **2013**, *242*, 817-831, doi:10.1002/dvdy.23969.
247. Mommaerts, H.; Esguerra, C.V.; Hartmann, U.; Luyten, F.P.; Tylzanowski, P. Smoc2 modulates embryonic myelopoiesis during zebrafish development. *Developmental dynamics : an official publication of the American Association of Anatomists* **2014**, *243*, 1375-1390, doi:10.1002/dvdy.24164.
248. Yao, Z.; Farr, G.H., 3rd; Tapscott, S.J.; Maves, L. Pbx and Prdm1a transcription factors differentially regulate subsets of the fast skeletal muscle program in zebrafish. *Biology open* **2013**, *2*, 546-555, doi:10.1242/bio.20133921.
249. Lam, S.H.; Mathavan, S.; Tong, Y.; Li, H.; Karuturi, R.K.; Wu, Y.; Vega, V.B.; Liu, E.T.; Gong, Z. Zebrafish whole-adult-organism chemogenomics for large-scale predictive and discovery chemical biology. *PLoS genetics* **2008**, *4*, e1000121, doi:10.1371/journal.pgen.1000121.
250. Pashay Ahi, E.; Walker, B.S.; Lassiter, C.S.; Jonsson, Z.O. Investigation of the effects of estrogen on skeletal gene expression during zebrafish larval head development. *PeerJ* **2016**, *4*, e1878, doi:10.7717/peerj.1878.
251. Liu, J.X.; Xu, Q.H.; Li, S.; Yu, X.; Liu, W.; Ouyang, G.; Zhang, T.; Chen, L.L. Transcriptional factors Eaf1/2 inhibit endoderm and mesoderm formation via suppressing TGF-beta signaling. *Biochimica et biophysica acta. Gene regulatory mechanisms* **2017**, *1860*, 1103-1116, doi:10.1016/j.bbagr.2017.09.001.
252. Montague, T.G.; Schier, A.F. Vg1-Nodal heterodimers are the endogenous inducers of mesendoderm. *eLife* **2017**, *6*, doi:10.7554/eLife.28183.
253. Liu, Z.; Ning, G.; Xu, R.; Cao, Y.; Meng, A.; Wang, Q. Fscn1 is required for the trafficking of TGF-beta family type I receptors during endoderm formation. *Nature communications* **2016**, *7*, 12603, doi:10.1038/ncomms12603.
254. Chen, H.; Babino, D.; Schoenbichler, S.A.; Arkhipova, V.; Tochterle, S.; Martin, F.; Huck, C.W.; von Lintig, J.; Meyer, D. Nmnat1-Rbp7 Is a Conserved Fusion-Protein That Combines NAD+ Catalysis of Nmnat1 with Subcellular Localization of Rbp7. *PLoS one* **2015**, *10*, e0143825, doi:10.1371/journal.pone.0143825.
255. Kobitski, A.Y.; Otte, J.C.; Takamiya, M.; Schafer, B.; Mertes, J.; Stegmaier, J.; Rastegar, S.; Rindone, F.; Hartmann, V.; Stotzka, R., et al. An ensemble-averaged, cell density-based digital model of zebrafish embryo development derived from light-sheet microscopy data with single-cell resolution. *Scientific reports* **2015**, *5*, 8601, doi:10.1038/srep08601.
256. Ma, Y.; Liu, X.; Liu, Z.; Wei, S.; Shang, H.; Xue, Y.; Cao, Y.; Meng, A.; Wang, Q. The Chromatin Remodeling Protein Bptf Promotes Posterior Neuroectodermal Fate by Enhancing Smad2-Activated wnt8a Expression. *The Journal of neuroscience : the official journal of the Society for Neuroscience* **2015**, *35*, 8493-8506, doi:10.1523/JNEUROSCI.0377-15.2015.
257. Ma, P.; Swartz, M.R.; Kindt, L.M.; Kangas, A.M.; Liang, J.O. Temperature Sensitivity of Neural Tube Defects in Zoep Mutants. *Zebrafish* **2015**, *12*, 448-456, doi:10.1089/zeb.2015.1113.
258. Araya, C.; Tawak, M.; Girdler, G.C.; Costa, M.; Carmona-Fontaine, C.; Clarke, J.D. Mesoderm is required for coordinated cell movements within zebrafish neural plate in vivo. *Neural development* **2014**, *9*, 9, doi:10.1186/1749-8104-9-9.
259. Terashima, A.V.; Mudumana, S.P.; Drummond, I.A. Odd skipped related 1 is a negative feedback regulator of nodal-induced endoderm development. *Developmental dynamics : an official publication of the American Association of Anatomists* **2014**, *243*, 1571-1580, doi:10.1002/dvdy.24191.
260. Huang, C.J.; Wilson, V.; Pennings, S.; MacRae, C.A.; Mullins, J. Sequential effects of spadetail, one-eyed pinhead and no tail on midline convergence of nephric primordia during zebrafish embryogenesis. *Developmental biology* **2013**, *384*, 290-300, doi:10.1016/j.ydbio.2013.07.002.
261. Slagle, C.E.; Aoki, T.; Burdine, R.D. Nodal-dependent mesendoderm specification requires the combinatorial activities of FoxH1 and Eomesodermin. *PLoS genetics* **2011**, *7*, e1002072, doi:10.1371/journal.pgen.1002072.
262. Arboleda-Estudillo, Y.; Krieg, M.; Stuhmer, J.; Licata, N.A.; Muller, D.J.; Heisenberg, C.P. Movement directionality in collective migration of germ layer progenitors. *Current biology : CB* **2010**, *20*, 161-169, doi:10.1016/j.cub.2009.11.036.
263. Kim, J.D.; Chun, H.S.; Kim, S.H.; Kim, H.S.; Kim, Y.S.; Kim, M.J.; Shin, J.; Rhee, M.; Yeo, S.Y.; Huh, T.L. Normal forebrain development may require continual Wnt antagonism until mid-somitogenesis in zebrafish. *Biochemical and biophysical research communications* **2009**, *381*, 717-721, doi:10.1016/j.bbrc.2009.02.135.
264. Latimer, A.J.; Jessen, J.R. Hgf/c-met expression and functional analysis during zebrafish embryogenesis. *Developmental dynamics : an official publication of the American Association of Anatomists* **2008**, *237*, 3904-3915, doi:10.1002/dvdy.21794.
265. Biemar, F.; Argenton, F.; Schmidtke, R.; Epperlein, S.; Peers, B.; Driever, W. Pancreas development in zebrafish: early dispersed appearance of endocrine hormone expressing cells and their convergence to form the definitive islet. *Developmental biology* **2001**, *230*, 189-203, doi:10.1006/dbio.2000.0103.
266. Deshwar, A.R.; Chng, S.C.; Ho, L.; Reversade, B.; Scott, I.C. The Apelin receptor enhances Nodal/TGFbeta signaling to ensure proper cardiac development. *eLife* **2016**, *5*, doi:10.7554/eLife.13758.

267. Kindt, L.M.; Coughlin, A.R.; Perosino, T.R.; Ersfeld, H.N.; Hampton, M.; Liang, J.O. Identification of transcripts potentially involved in neural tube closure using RNA sequencing. *Genesis* **2018**, *56*, e23096, doi:10.1002/dvg.23096.
268. Burdine, R.D.; Grimes, D.T. Antagonistic interactions in the zebrafish midline prior to the emergence of asymmetric gene expression are important for left-right patterning. *Philosophical transactions of the Royal Society of London. Series B, Biological sciences* **2016**, *371*, doi:10.1098/rstb.2015.0402.
269. Xu, P.F.; Zhu, K.Y.; Jin, Y.; Chen, Y.; Sun, X.J.; Deng, M.; Chen, S.J.; Chen, Z.; Liu, T.X. Setdb2 restricts dorsal organizer territory and regulates left-right asymmetry through suppressing fgf8 activity. *Proceedings of the National Academy of Sciences of the United States of America* **2010**, *107*, 2521-2526, doi:10.1073/pnas.0914396107.
270. Antinucci, P.; Nikolaou, N.; Meyer, M.P.; Hindges, R. Teneurin-3 specifies morphological and functional connectivity of retinal ganglion cells in the vertebrate visual system. *Cell reports* **2013**, *5*, 582-592, doi:10.1016/j.celrep.2013.09.045.
271. Mieda, M.; Kikuchi, Y.; Hirate, Y.; Aoki, M.; Okamoto, H. Compartmentalized expression of zebrafish ten-m3 and ten-m4, homologues of the Drosophila ten(m)/odd Oz gene, in the central nervous system. *Mechanisms of development* **1999**, *87*, 223-227.
272. Hortopan, G.A.; Dinday, M.T.; Baraban, S.C. Zebrafish as a model for studying genetic aspects of epilepsy. *Disease models & mechanisms* **2010**, *3*, 144-148, doi:10.1242/dmm.002139.
273. Hor, H.; Francescato, L.; Bartesaghi, L.; Ortega-Cubero, S.; Kousi, M.; Lorenzo-Betancor, O.; Jimenez-Jimenez, F.J.; Gironell, A.; Clarimon, J.; Drechsel, O., et al. Missense mutations in TENM4, a regulator of axon guidance and central myelination, cause essential tremor. *Human molecular genetics* **2015**, *24*, 5677-5686, doi:10.1093/hmg/ddv281.
274. Sogah, V.M.; Serluca, F.C.; Fishman, M.C.; Yelon, D.L.; Macrae, C.A.; Mably, J.D. Distinct troponin C isoform requirements in cardiac and skeletal muscle. *Developmental dynamics : an official publication of the American Association of Anatomists* **2010**, *239*, 3115-3123, doi:10.1002/dvdy.22445.
275. Ho, Y.L.; Lin, Y.H.; Tsai, W.Y.; Hsieh, F.J.; Tsai, H.J. Conditional antisense-knockdown of zebrafish cardiac troponin C as a new animal model for dilated cardiomyopathy. *Circulation journal : official journal of the Japanese Circulation Society* **2009**, *73*, 1691-1697.
276. Genge, C.E.; Davidson, W.S.; Tibbits, G.F. Adult teleost heart expresses two distinct troponin C paralogs: cardiac TnC and a novel and teleost-specific ssTnC in a chamber- and temperature-dependent manner. *Physiological genomics* **2013**, *45*, 866-875, doi:10.1152/physiolgenomics.00074.2013.
277. Junker, J.P.; Noel, E.S.; Guryev, V.; Peterson, K.A.; Shah, G.; Huiskens, J.; McMahon, A.P.; Berezikov, E.; Bakkers, J.; van Oudenaarden, A. Genome-wide RNA Tomography in the zebrafish embryo. *Cell* **2014**, *159*, 662-675, doi:10.1016/j.cell.2014.09.038.
278. Orr, N.; Arnaout, R.; Gula, L.J.; Spears, D.A.; Leong-Sit, P.; Li, Q.; Tarhuni, W.; Reischauer, S.; Chauhan, V.S.; Borkovich, M., et al. A mutation in the atrial-specific myosin light chain gene (MYL4) causes familial atrial fibrillation. *Nature communications* **2016**, *7*, 11303, doi:10.1038/ncomms11303.
279. Elworthy, S.; Hargrave, M.; Knight, R.; Mebus, K.; Ingham, P.W. Expression of multiple slow myosin heavy chain genes reveals a diversity of zebrafish slow twitch muscle fibres with differing requirements for Hedgehog and Prdm1 activity. *Development (Cambridge, England)* **2008**, *135*, 2115-2126, doi:10.1242/dev.015719.
280. Holterhoff, C.K.; Saunders, R.H.; Brito, E.E.; Wagner, D.S. Sequence and expression of the zebrafish alpha-actinin gene family reveals conservation and diversification among vertebrates. *Developmental dynamics : an official publication of the American Association of Anatomists* **2009**, *238*, 2936-2947, doi:10.1002/dvdy.22123.
281. Wang, X.; Ono, Y.; Tan, S.C.; Chai, R.J.; Parkin, C.; Ingham, P.W. Prdm1a and miR-499 act sequentially to restrict Sox6 activity to the fast-twitch muscle lineage in the zebrafish embryo. *Development (Cambridge, England)* **2011**, *138*, 4399-4404, doi:10.1242/dev.070516.
282. Kelu, J.J.; Webb, S.E.; Galione, A.; Miller, A.L. TPC2-mediated Ca(2+) signaling is required for the establishment of synchronized activity in developing zebrafish primary motor neurons. *Developmental biology* **2018**, *438*, 57-68, doi:10.1016/j.ydbio.2018.02.011.
283. Kelu, J.J.; Webb, S.E.; Parrington, J.; Galione, A.; Miller, A.L. Ca(2+) release via two-pore channel type 2 (TPC2) is required for slow muscle cell myofibrillogenesis and myotomal patterning in intact zebrafish embryos. *Developmental biology* **2017**, *425*, 109-129, doi:10.1016/j.ydbio.2017.03.031.
284. Kelu, J.J.; Chan, H.L.; Webb, S.E.; Cheng, A.H.; Ruas, M.; Parrington, J.; Galione, A.; Miller, A.L. Two-Pore Channel 2 activity is required for slow muscle cell-generated Ca(2+) signaling during myogenesis in intact zebrafish. *The International journal of developmental biology* **2015**, *59*, 313-325, doi:10.1387/ijdb.150206am.
285. Prober, D.A.; Zimmerman, S.; Myers, B.R.; McDermott, B.M., Jr.; Kim, S.H.; Caron, S.; Rihel, J.; Solnica-Krezel, L.; Julius, D.; Hudspeth, A.J., et al. Zebrafish TRPA1 channels are required for chemosensation but not for thermosensation or mechanosensory hair cell function. *The Journal of neuroscience : the official journal of the Society for Neuroscience* **2008**, *28*, 10102-10110, doi:10.1523/JNEUROSCI.2740-08.2008.
286. Faucherre, A.; Nargeot, J.; Mangoni, M.E.; Jopling, C. piezo2b regulates vertebrate light touch response. *The Journal of neuroscience : the official journal of the Society for Neuroscience* **2013**, *33*, 17089-17094, doi:10.1523/JNEUROSCI.0522-13.2013.

287. Gau, P.; Curtright, A.; Condon, L.; Raible, D.W.; Dhaka, A. An ancient neurotrophin receptor code; a single Runx/Cbfbeta complex determines somatosensory neuron fate specification in zebrafish. *PLoS genetics* **2017**, *13*, e1006884, doi:10.1371/journal.pgen.1006884.
288. Yu, P.C.; Gu, S.Y.; Bu, J.W.; Du, J.L. TRPC1 is essential for in vivo angiogenesis in zebrafish. *Circulation research* **2010**, *106*, 1221-1232, doi:10.1161/CIRCRESAHA.109.207670.
289. Graham, D.M.; Huang, L.; Robinson, K.R.; Messerli, M.A. Epidermal keratinocyte polarity and motility require Ca(2)(+) influx through TRPV1. *Journal of cell science* **2013**, *126*, 4602-4613, doi:10.1242/jcs.122192.
290. Von Niederhausern, V.; Kastenhuber, E.; Stauble, A.; Gesemann, M.; Neuhauss, S.C. Phylogeny and expression of canonical transient receptor potential (TRPC) genes in developing zebrafish. *Developmental dynamics : an official publication of the American Association of Anatomists* **2013**, *242*, 1427-1441, doi:10.1002/dvdy.24041.
291. Moller, C.C.; Mangos, S.; Drummond, I.A.; Reiser, J. Expression of trpC1 and trpC6 orthologs in zebrafish. *Gene expression patterns : GEP* **2008**, *8*, 291-296, doi:10.1016/j.gep.2008.02.002.
292. Suzuki, H.; Nikaido, M.; Hagino-Yamagishi, K.; Okada, N. Distinct functions of two olfactory marker protein genes derived from teleost-specific whole genome duplication. *BMC evolutionary biology* **2015**, *15*, 245, doi:10.1186/s12862-015-0530-y.
293. Ahuja, G.; Bozorg Nia, S.; Zapilko, V.; Shiriagin, V.; Kowatschew, D.; Oka, Y.; Korsching, S.I. Kappe neurons, a novel population of olfactory sensory neurons. *Scientific reports* **2014**, *4*, 4037, doi:10.1038/srep04037.
294. Sato, Y.; Miyasaka, N.; Yoshihara, Y. Mutually exclusive glomerular innervation by two distinct types of olfactory sensory neurons revealed in transgenic zebrafish. *The Journal of neuroscience : the official journal of the Society for Neuroscience* **2005**, *25*, 4889-4897, doi:10.1523/JNEUROSCI.0679-05.2005.
295. Kastenhuber, E.; Gesemann, M.; Mickoleit, M.; Neuhauss, S.C. Phylogenetic analysis and expression of zebrafish transient receptor potential melastatin family genes. *Developmental dynamics : an official publication of the American Association of Anatomists* **2013**, *242*, 1236-1249, doi:10.1002/dvdy.24020.
296. Yoshida, Y.; Saitoh, K.; Aihara, Y.; Okada, S.; Misaka, T.; Abe, K. Transient receptor potential channel M5 and phospholipaseC-beta2 colocalizing in zebrafish taste receptor cells. *Neuroreport* **2007**, *18*, 1517-1520, doi:10.1097/WNR.0b013e3282ec6874.
297. Arjona, F.J.; Chen, Y.X.; Flik, G.; Bindels, R.J.; Hoenderop, J.G. Tissue-specific expression and in vivo regulation of zebrafish orthologues of mammalian genes related to symptomatic hypomagnesemia. *Pflugers Archiv : European journal of physiology* **2013**, *465*, 1409-1421, doi:10.1007/s00424-013-1275-3.
298. Elizondo, M.R.; Arduini, B.L.; Paulsen, J.; MacDonald, E.L.; Sabel, J.L.; Henion, P.D.; Cornell, R.A.; Parichy, D.M. Defective skeletogenesis with kidney stone formation in dwarf zebrafish mutant for trpm7. *Current biology : CB* **2005**, *15*, 667-671, doi:10.1016/j.cub.2005.02.050.
299. Elizondo, M.R.; Budi, E.H.; Parichy, D.M. trpm7 regulation of in vivo cation homeostasis and kidney function involves stanniocalcin 1 and fgf23. *Endocrinology* **2010**, *151*, 5700-5709, doi:10.1210/en.2010-0853.
300. Yee, N.S.; Zhou, W.; Liang, I.C. Transient receptor potential ion channel Trpm7 regulates exocrine pancreatic epithelial proliferation by Mg2+-sensitive Socs3a signaling in development and cancer. *Disease models & mechanisms* **2011**, *4*, 240-254, doi:10.1242/dmm.004564.
301. Low, S.E.; Amburgey, K.; Horstick, E.; Linsley, J.; Sprague, S.M.; Cui, W.W.; Zhou, W.; Hirata, H.; Saint-Amant, L.; Hume, R.I., et al. TRPM7 is required within zebrafish sensory neurons for the activation of touch-evoked escape behaviors. *The Journal of neuroscience : the official journal of the Society for Neuroscience* **2011**, *31*, 11633-11644, doi:10.1523/jneurosci.4950-10.2011.
302. Sah, R.; Mesirca, P.; Van den Boogert, M.; Rosen, J.; Mably, J.; Mangoni, M.E.; Clapham, D.E. Ion channel-kinase TRPM7 is required for maintaining cardiac automaticity. *Proceedings of the National Academy of Sciences of the United States of America* **2013**, *110*, E3037-3046, doi:10.1073/pnas.1311865110.
303. Decker, A.R.; McNeill, M.S.; Lambert, A.M.; Overton, J.D.; Chen, Y.C.; Lorca, R.A.; Johnson, N.A.; Brockerhoff, S.E.; Mohapatra, D.P.; MacArthur, H., et al. Abnormal differentiation of dopaminergic neurons in zebrafish trpm7 mutant larvae impairs development of the motor pattern. *Developmental biology* **2014**, *386*, 428-439, doi:10.1016/j.ydbio.2013.11.015.
304. Wingert, R.A.; Selleck, R.; Yu, J.; Song, H.D.; Chen, Z.; Song, A.; Zhou, Y.; Thisse, B.; Thisse, C.; McMahon, A.P., et al. The cdx genes and retinoic acid control the positioning and segmentation of the zebrafish pronephros. *PLoS genetics* **2007**, *3*, 1922-1938, doi:10.1371/journal.pgen.0030189.
305. Vasilyev, A.; Liu, Y.; Mudumana, S.; Mangos, S.; Lam, P.Y.; Majumdar, A.; Zhao, J.; Poon, K.L.; Kondrychyn, I.; Korzh, V., et al. Collective cell migration drives morphogenesis of the kidney nephron. *PLoS biology* **2009**, *7*, e9, doi:10.1371/journal.pbio.1000009.
306. Gau, P.; Poon, J.; Ufret-Vincenty, C.; Snelson, C.D.; Gordon, S.E.; Raible, D.W.; Dhaka, A. The zebrafish ortholog of TRPV1 is required for heat-induced locomotion. *The Journal of neuroscience : the official journal of the Society for Neuroscience* **2013**, *33*, 5249-5260, doi:10.1523/JNEUROSCI.5403-12.2013.

307. Heckel, E.; Boselli, F.; Roth, S.; Krudewig, A.; Belting, H.G.; Charvin, G.; Vermot, J. Oscillatory Flow Modulates Mechanosensitive *klf2a* Expression through *trpv4* and *trpp2* during Heart Valve Development. *Current biology : CB* **2015**, *25*, 1354-1361, doi:10.1016/j.cub.2015.03.038.
308. Kottgen, M.; Buchholz, B.; Garcia-Gonzalez, M.A.; Kotsis, F.; Fu, X.; Doerken, M.; Boehlke, C.; Steffl, D.; Tauber, R.; Wegierski, T., et al. TRPP2 and TRPV4 form a polymodal sensory channel complex. *The Journal of cell biology* **2008**, *182*, 437-447, doi:10.1083/jcb.200805124.
309. Amato, V.; Vina, E.; Calavia, M.G.; Guerrero, M.C.; Laura, R.; Navarro, M.; De Carlos, F.; Cobo, J.; Germana, A.; Vega, J.A. TRPV4 in the sensory organs of adult zebrafish. *Microscopy research and technique* **2012**, *75*, 89-96, doi:10.1002/jemt.21029.
310. Sanchez-Ramos, C.; Guerrero, M.C.; Bonnin-Arias, C.; Calavia, M.G.; Laura, R.; Germana, A.; Vega, J.A. Expression of TRPV4 in the zebrafish retina during development. *Microscopy research and technique* **2012**, *75*, 743-748, doi:10.1002/jemt.21120.
311. Mangos, S.; Liu, Y.; Drummond, I.A. Dynamic expression of the osmosensory channel *trpv4* in multiple developing organs in zebrafish. *Gene expression patterns : GEP* **2007**, *7*, 480-484, doi:10.1016/j.modgep.2006.10.011.
312. Vanoevelen, J.; Janssens, A.; Huitema, L.F.; Hammond, C.L.; Metz, J.R.; Flik, G.; Voets, T.; Schulte-Merker, S. *Trpv5/6* is vital for epithelial calcium uptake and bone formation. *FASEB journal : official publication of the Federation of American Societies for Experimental Biology* **2011**, *25*, 3197-3207, doi:10.1096/fj.11-183145.
313. Shu, Y.; Lou, Q.; Dai, Z.; Dai, X.; He, J.; Hu, W.; Yin, Z. The basal function of teleost prolactin as a key regulator on ion uptake identified with zebrafish knockout models. *Scientific reports* **2016**, *6*, 18597, doi:10.1038/srep18597.
314. Pan, T.C.; Liao, B.K.; Huang, C.J.; Lin, L.Y.; Hwang, P.P. Epithelial  $\text{Ca}(2+)$  channel expression and  $\text{Ca}(2+)$  uptake in developing zebrafish. *American journal of physiology. Regulatory, integrative and comparative physiology* **2005**, *289*, R1202-1211, doi:10.1152/ajpregu.00816.2004.
315. Gebriel, M.; Prabhudesai, S.; Uleberg, K.E.; Larssen, E.; Piston, D.; Bjornstad, A.H.; Moller, S.G. Zebrafish brain proteomics reveals central proteins involved in neurodegeneration. *Journal of neuroscience research* **2014**, *92*, 104-115, doi:10.1002/jnr.23297.
316. Yin, A.; Korzh, V.; Gong, Z. Perturbation of zebrafish swimbladder development by enhancing Wnt signaling in *Wif1* morphants. *Biochimica et biophysica acta* **2012**, *1823*, 236-244, doi:10.1016/j.bbamcr.2011.09.018.
317. Szeto, D.P.; Kimelman, D. The regulation of mesodermal progenitor cell commitment to somitogenesis subdivides the zebrafish body musculature into distinct domains. *Genes & development* **2006**, *20*, 1923-1932, doi:10.1101/gad.1435306.
318. Row, R.H.; Kimelman, D. Bmp inhibition is necessary for post-gastrulation patterning and morphogenesis of the zebrafish tailbud. *Developmental biology* **2009**, *329*, 55-63, doi:10.1016/j.ydbio.2009.02.016.
319. Smith, C.J.; Morris, A.D.; Welsh, T.G.; Kucenas, S. Contact-mediated inhibition between oligodendrocyte progenitor cells and motor exit point glia establishes the spinal cord transition zone. *PLoS biology* **2014**, *12*, e1001961, doi:10.1371/journal.pbio.1001961.
320. Lush, M.E.; Piotrowski, T. ErbB expressing Schwann cells control lateral line progenitor cells via non-cell-autonomous regulation of Wnt/beta-catenin. *eLife* **2014**, *3*, e01832, doi:10.7554/eLife.01832.
321. Samarut, E.; Bekri, A.; Drapeau, P. Transcriptomic Analysis of Purified Embryonic Neural Stem Cells from Zebrafish Embryos Reveals Signaling Pathways Involved in Glycine-Dependent Neurogenesis. *Frontiers in molecular neuroscience* **2016**, *9*, 22, doi:10.3389/fnmol.2016.00022.
